# Supplementary material
Source: publisher figshare collection journal article supplement (https://frontiersin.figshare.com/ndownloader/files/27459260)
Supplement: Supplementary file 1 [file 27459260]

languages	participants	tasks	sentences	contrast	positions	orthograph	Word	FixCount	FixPercent	DwellTime	DwellPercent	RunCount	Regression	pitchmax_hz	pitchmin_hz	pitchrange_hz	mean_hz	sd_hz	normpitchmax_hz	normpitchmin_hz	normpitchrange_hz	pitchmax_st	pitchmin_st	pitchrange_st	mean_st	sd_st	normpitchmax_st	normpitchmin_st	normpitchrange_st	Duration	Intensity
1	1	1	1	1	1	0	blue	2	25	806	37.42	2	1	224.7594605	200.5800439	24.17941667	198.7306972	41.7543901	0.623377882	0.044291071	0.579086811	93.74741873	91.7764338	1.970984934	91.19046363	4.003842904	0.638625231	0.146351938	0.492273293	0.259001414	63.62591252
1	1	1	1	0	2	0	drum							242.2136425	220.7058117	21.50783075	198.7306972	41.7543901	1.041398165	0.526294706	0.51510346	95.04164278	93.43188458	1.609758193	91.19046363	4.003842904	0.961870693	0.559817406	0.402053287	0.278409303	61.9413327
1	1	1	1	1	3	0	yellow	1	12.5	292	13.56	1	0	183.1778275	154.7737211	28.40410637	198.7306972	41.7543901	-0.372484659	-1.052751005	0.680266346	90.20507268	87.28820599	2.916866689	91.19046363	4.003842904	-0.246111292	-0.97462806	0.728516768	0.312721512	59.16495788
1	1	1	1	0	4	0	drum							229.3203646	108.3716189	120.9487457	198.7306972	41.7543901	0.732609608	-2.164061746	2.896671354	94.52189742	81.11811808	13.40377933	91.19046363	4.003842904	0.832059067	-2.515669519	3.347728585	0.38345614	52.8368542
1	1	1	2	0	1	0	blue							207.0773321	198.464325	8.613007137	198.7306972	41.7543901	0.199898378	-0.006379503	0.206277881	92.32831701	91.59282944	0.735487568	91.19046363	4.003842904	0.284190316	0.100494904	0.183695412	0.186567177	65.01557086
1	1	1	2	1	2	0	drum	0	0	0	0	0	0	249.8791688	216.6876276	33.19154121	198.7306972	41.7543901	1.224984281	0.430060894	0.794923387	95.58104581	93.11188093	2.469164887	91.19046363	4.003842904	1.096592021	0.479893279	0.616698742	0.296984486	62.51266206
1	1	1	2	0	3	0	blue							192.0450849	177.3388872	14.70619762	198.7306972	41.7543901	-0.160117591	-0.512324812	0.352207221	91.02466126	89.64470983	1.379951424	91.19046363	4.003842904	-0.041410808	-0.386067545	0.344656737	0.197989658	59.66464633
1	1	1	2	1	4	0	ball	1	11.11	894	34.2	1	0	186.1302448	150.035622	36.09462285	198.7306972	41.7543901	-0.301775512	-1.166226476	0.864450965	90.48227923	86.74994732	3.732331907	91.19046363	4.003842904	-0.176876171	-1.109063571	0.932187401	0.258909552	58.28178958
1	1	1	3	0	1	0	gold							215.0941258	204.8547618	10.23936406	198.7306972	41.7543901	0.3918972	0.146668758	0.245228441	92.98589179	92.14149172	0.844400069	91.19046363	4.003842904	0.448426225	0.237528822	0.210897403	0.223690647	65.68137317
1	1	1	3	1	2	0	sock	0	0	0	0	0	0	212.0320719	195.6867806	16.34529132	198.7306972	41.7543901	0.318562303	-0.072900518	0.39146282	92.73766431	91.34885612	1.388808196	91.19046363	4.003842904	0.386428918	0.039560116	0.346868802	0.298254196	64.09533842
1	1	1	3	0	3	0	gold							191.4595237	172.4130382	19.04648549	198.7306972	41.7543901	-0.174141534	-0.630296814	0.45615528	90.97074738	89.15675983	1.813987549	91.19046363	4.003842904	-0.054876341	-0.507937961	0.453061619	0.186408872	59.00243136
1	1	1	3	1	4	0	star	1	10	544	20.28	1	0	237.3879097	231.9678359	5.420073805	198.7306972	41.7543901	0.925823904	0.796015427	0.129808477	94.69323179	94.29337162	0.399860172	91.19046363	4.003842904	0.874851547	0.774982452	0.099869096	0.410099519	55.07410809
1	1	1	4	1	1	0	gold	1	7.14	300	9.57	1	0	245.4061191	203.928679	41.47744011	198.7306972	41.7543901	1.117856631	0.124489467	0.993367164	95.26854396	92.06307035	3.205473608	91.19046363	4.003842904	1.018541543	0.217942297	0.800599246	0.262797805	62.07165115
1	1	1	4	0	2	0	sock							207.352126	179.5951844	27.75694153	198.7306972	41.7543901	0.206479576	-0.458287447	0.664767023	92.35126835	89.86325986	2.488008487	91.19046363	4.003842904	0.289922644	-0.331482479	0.621405123	0.305997444	63.08815197
1	1	1	4	1	3	0	red	2	14.29	788	25.13	2	0	197.2455847	165.1827604	32.06282431	198.7306972	41.7543901	-0.035567818	-0.803458912	0.767891094	91.48640696	88.41596092	3.070446033	91.19046363	4.003842904	0.073914821	-0.692959933	0.766874754	0.327597263	58.5814569
1	1	1	4	0	4	0	sock							162.9198158	155.220131	7.699684886	198.7306972	41.7543901	-0.857655479	-1.042059677	0.184404198	88.17621934	87.3380624	0.83815694	91.19046363	4.003842904	-0.752837802	-0.96217592	0.209338118	0.381596812	57.73543625
1	1	1	5	0	1	1	yellow							216.4706986	200.7863622	15.6843364	198.7306972	41.7543901	0.424865537	0.049232307	0.375633229	93.09634541	91.79422185	1.30212357	91.19046363	4.003842904	0.476013127	0.150794683	0.325218444	0.251507897	66.12313229
1	1	1	5	1	2	1	tree	2	20	266	10.07	1	0	249.7212562	212.3271219	37.39413425	198.7306972	41.7543901	1.221202341	0.325628625	0.895573716	95.57010819	92.76173829	2.808369899	91.19046363	4.003842904	1.09386024	0.392441636	0.701418604	0.288023562	62.71675757
1	1	1	5	0	3	1	yellow							198.7799862	172.8821023	25.89788387	198.7306972	41.7543901	0.00118045	-0.619062927	0.620243376	91.6201668	89.20374291	2.416423884	91.19046363	4.003842904	0.107322685	-0.496203465	0.603526149	0.316540747	60.7413034
1	1	1	5	1	4	1	star	1	10	164	6.21	1	0	207.0793016	174.9960953	32.08320628	198.7306972	41.7543901	0.199945547	-0.568433688	0.768379234	92.3284749	89.41410616	2.914368741	91.19046363	4.003842904	0.284229751	-0.443663129	0.727892879	0.427757766	52.8010638
1	1	1	6	1	1	1	yellow	2	13.33	416	16.57	2	0	208.744356	180.8198512	27.92450481	198.7306972	41.7543901	0.239822896	-0.428957195	0.668780091	92.46712074	89.98092507	2.48619567	91.19046363	4.003842904	0.318857942	-0.30209441	0.620952352	0.298523359	65.32640258
1	1	1	6	0	2	1	tree							282.9298656	225.6002794	57.32958619	198.7306972	41.7543901	2.016534504	0.643515139	1.373019365	97.73160795	93.81165808	3.919949869	91.19046363	4.003842904	1.633716526	0.654669654	0.979046872	0.31510799	63.15248012
1	1	1	6	1	3	1	white	2	13.33	318	12.67	2	0	174.0329852	163.2229443	10.81004083	198.7306972	41.7543901	-0.591499768	-0.85039568	0.258895912	89.31869302	88.20840074	1.110292281	91.19046363	4.003842904	-0.467493519	-0.744800174	0.277306654	0.174138626	56.67684112
1	1	1	6	0	4	1	tree							83.43365422	72.17311292	11.2605413	198.7306972	41.7543901	-2.761315463	-3.031000669	0.269685206	76.59166606	74.0934571	2.498208956	91.19046363	4.003842904	-3.646196397	-4.27014919	0.623952792	0.265354097	53.85355505
1	1	1	7	0	1	1	brown							225.7444154	202.0568064	23.68760901	198.7306972	41.7543901	0.646967135	0.079658909	0.567308227	93.82233189	91.90345463	1.918877258	91.19046363	4.003842904	0.657335546	0.178076667	0.479258879	0.222351673	63.53970193
1	1	1	7	1	2	1	angel	1	10	198	11	1	0	205.6916074	192.4512047	13.24040276	198.7306972	41.7543901	0.166710857	-0.150391193	0.31710205	92.2134313	91.0601867	1.153244603	91.19046363	4.003842904	0.255496455	-0.032537973	0.288034428	0.393391422	62.51376112
1	1	1	7	0	3	1	brown							192.3341485	173.9542213	18.37992717	198.7306972	41.7543901	-0.15319464	-0.59338613	0.44019149	91.04968709	89.31076654	1.738920548	91.19046363	4.003842904	-0.035160356	-0.469473237	0.434312882	0.260835617	60.21715663
1	1	1	7	1	4	1	egg	1	10	188	10.44	1	0	59.0095273	58.50826976	0.50125754	198.7306972	41.7543901	-3.346262982	-3.358267888	0.012004906	70.59451639	70.44682379	0.147692593	91.19046363	4.003842904	-5.144044793	-5.180932504	0.036887711	0.241593645	55.07339665
1	1	1	8	1	1	1	brown	1	8.33	312	12.94	1	0	260.0154444	205.5900962	54.42534822	198.7306972	41.7543901	1.467743799	0.164279707	1.303464092	96.27026055	92.20352635	4.066734205	91.19046363	4.003842904	1.268730328	0.253022595	1.015707733	0.296662844	64.41710234
1	1	1	8	0	2	1	angel							212.8202071	183.3801586	29.44004852	198.7306972	41.7543901	0.337437808	-0.367638914	0.705076722	92.80166247	90.22427642	2.577386049	91.19046363	4.003842904	0.402413101	-0.241314965	0.643728066	0.448365435	62.88468716
1	1	1	8	1	3	1	green	1	8.33	284	11.77	1	0	189.1830601	94.55172049	94.63133962	198.7306972	41.7543901	-0.228661875	-2.495042473	2.266380598	91.07312386	78.75638166	12.3167422	91.19046363	4.003842904	-0.029306787	-3.105536923	3.076230136	0.260099504	56.35462695
1	1	1	8	0	4	1	angel							222.7525518	108.4705642	114.2819875	198.7306972	41.7543901	0.575313266	-2.161692048	2.737005314	93.59164969	81.13391736	12.45773233	91.19046363	4.003842904	0.599720348	-2.51172349	3.111443838	0.434880761	53.70556586
1	1	1	9	0	1	2	blue							213.7260115	202.1364192	11.58959229	198.7306972	41.7543901	0.35913144	0.081565602	0.277565838	92.87449132	91.9102528	0.96423852	91.19046363	4.003842904	0.420602838	0.179774578	0.24082826	0.126340576	67.65503155
1	1	1	9	1	2	2	egg	2	22.2	250	10.11	2	0	225.8640514	168.7788272	57.08522424	198.7306972	41.7543901	0.649832367	-0.717334632	1.367166999	93.83173031	88.79145599	5.040274318	91.19046363	4.003842904	0.659682895	-0.599176266	1.258859161	0.302319593	59.95220139
1	1	1	9	0	3	2	blue							168.8032479	161.4620025	7.341245433	198.7306972	41.7543901	-0.716749766	-0.892569492	0.175819725	88.79038623	88.02061064	0.769775597	91.19046363	4.003842904	-0.599443449	-0.791702638	0.192259189	0.192669378	58.79730098
1	1	1	9	1	4	2	sock	1	11.11	236	9.55	1	0	161.398776	161.398776	0	198.7306972	41.7543901	-0.89408374	-0.89408374	0	88.01382992	88.01382992	0	91.19046363	4.003842904	-0.793396191	-0.793396191	0	0.262156695	57.12539628
1	1	1	10	1	1	2	blue	1	12.5	244	10.98	1	0	207.3885398	198.8675503	8.520989475	198.7306972	41.7543901	0.207351671	0.003277573	0.204074098	92.35432704	91.62797386	0.72635318	91.19046363	4.003842904	0.290686582	0.109272576	0.181414006	0.166112122	65.48073315
1	1	1	10	0	2	2	egg							201.849511	193.9742918	7.875219158	198.7306972	41.7543901	0.074694272	-0.113913901	0.188608172	91.88561464	91.19667298	0.688941663	91.19046363	4.003842904	0.17362095	0.001550847	0.172070103	0.194526038	65.34424951
1	1	1	10	1	3	2	brown	1	12.5	318	14.31	1	0	188.7749876	97.81378584	90.96120177	198.7306972	41.7543901	-0.238435039	-2.416917387	2.178482347	90.72628494	79.34359089	11.38269406	91.19046363	4.003842904	-0.115933292	-2.958875517	2.842942224	0.229497011	58.43512983
1	1	1	10	0	4	2	egg							77.16123505	75.57662068	1.584614374	198.7306972	41.7543901	-2.911537251	-2.949488096	0.037950845	75.23765196	74.87841731	0.359234652	91.19046363	4.003842904	-3.984375025	-4.074097489	0.089722464	0.24042544	55.03184398
1	1	1	11	0	1	2	green							210.4759444	199.0427228	11.43322158	198.7306972	41.7543901	0.281293706	0.00747288	0.273820826	92.61014632	91.6432168	0.966929516	91.19046363	4.003842904	0.354580018	0.113079654	0.241500364	0.308184776	63.35646176
1	1	1	11	1	2	2	bell	1	7.69	136	5.67	1	0	207.2963238	177.4267694	29.86955435	198.7306972	41.7543901	0.205143137	-0.51022007	0.715363207	92.34658552	89.65293011	2.693655407	91.19046363	4.003842904	0.28875306	-0.384014447	0.672767507	0.308184776	62.46443549
1	1	1	11	0	3	2	green							179.8886793	164.5409723	15.34770697	198.7306972	41.7543901	-0.451258368	-0.818829466	0.367571098	89.89152878	88.34763677	1.543892013	91.19046363	4.003842904	-0.324422032	-0.710024576	0.385602544	0.293272609	58.4772632
1	1	1	11	1	4	2	egg	0	0	0	0	0	0	158.9159784	143.4756693	15.44030902	198.7306972	41.7543901	-0.953545693	-1.323334572	0.369788879	87.74544811	85.97594754	1.769500574	91.19046363	4.003842904	-0.860427245	-1.302377795	0.441950549	0.283331165	52.9448452
1	1	1	12	1	1	2	green	0	0	0	0	0	0	209.5800033	200.0479394	9.532063812	198.7306972	41.7543901	0.259836296	0.031547393	0.228288903	92.53628734	91.7304281	0.805859236	91.19046363	4.003842904	0.336132996	0.134861552	0.201271443	0.26095273	64.11622611
1	1	1	12	0	2	2	bell							203.4185899	182.5602763	20.85831353	198.7306972	41.7543901	0.112273048	-0.387274749	0.499547797	92.01928336	90.1466775	1.872605857	91.19046363	4.003842904	0.207006056	-0.260696075	0.467702131	0.26095273	65.54889839
1	1	1	12	1	3	2	silver	2	15.38	376	16.08	2	0	182.8615519	162.036106	20.82544589	198.7306972	41.7543901	-0.380059326	-0.878819955	0.49876063	90.1752955	88.08209013	2.093205376	91.19046363	4.003842904	-0.253548442	-0.776347518	0.522799076	0.412587424	59.4592826
1	1	1	12	0	4	2	bell							161.37079	93.71623344	67.65455652	198.7306972	41.7543901	-0.894753992	-2.515052035	1.620298043	88.01047207	78.60278346	9.407688615	91.19046363	4.003842904	-0.794234848	-3.143899617	2.349664769	0.26095273	55.8959462
1	1	2	13	1	5	0	brother	2	12.5	582	20.89	2	1	254.3147638	208.0272516	46.28751225	198.7306972	41.7543901	1.331214907	0.222648549	1.108566359	95.88569155	92.40756572	3.478125839	91.19046363	4.003842904	1.172680356	0.303983478	0.868696878	0.333877626	66.59875504
1	1	2	13	0	6	0	doctor							181.4002672	62.73612941	118.6641378	198.7306972	41.7543901	-0.415056477	-3.257012436	2.84195596	90.03639325	71.68566972	18.35072353	91.19046363	4.003842904	-0.288240675	-4.871518284	4.583277609	0.455794062	55.65657459
1	1	2	13	0	5	0	brother							236.8636923	206.3236896	30.54000273	198.7306972	41.7543901	0.913269119	0.181848958	0.73142016	94.6545971	92.26518866	2.389408439	91.19046363	4.003842904	0.865202145	0.268423376	0.596778769	0.181814543	67.79913072
1	1	2	13	1	6	0	doctor	1	10	242	11.97	1	0	234.8527341	172.1888695	62.66386462	198.7306972	41.7543901	0.86510752	-0.63566556	1.500773079	94.50725094	89.1342059	5.37304504	91.19046363	4.003842904	0.828400961	-0.513571032	1.341971993	0.507754365	56.81360649
1	1	2	14	0	5	0	He							226.8791225	190.5776866	36.30143583	198.7306972	41.7543901	0.674142891	-0.19526116	0.869404051	93.91904259	90.89161012	3.027432479	91.19046363	4.003842904	0.681490015	-0.074641667	0.756131682	0.108605691	59.59954943
1	1	2	14	1	6	0	study	0	0	0	0	0	0	219.0002823	95.54908949	123.4511928	198.7306972	41.7543901	0.485447997	-2.471155907	2.956603905	93.29746703	78.93821508	14.35925195	91.19046363	4.003842904	0.526245272	-3.060122199	3.586367471	0.458946632	57.61896585
1	1	2	14	1	5	0	He	1	11.11	404	19.54	1	0	255.6457689	214.9147736	40.73099529	198.7306972	41.7543901	1.363091917	0.38760179	0.975490127	95.97596447	92.97181475	3.004149726	91.19046363	4.003842904	1.195226924	0.444910343	0.750316581	0.087736975	61.08322472
1	1	2	14	0	6	0	study							200.5962677	171.9606117	28.63565599	198.7306972	41.7543901	0.044679624	-0.641132237	0.685811861	91.77781144	89.11124727	2.666564167	91.19046363	4.003842904	0.146696018	-0.51930518	0.666001198	0.30159585	61.74980732
1	1	2	15	0	5	0	three							238.1140048	220.208129	17.90587582	198.7306972	41.7543901	0.943213575	0.514375415	0.428838159	94.74612065	93.392687	1.353433652	91.19046363	4.003842904	0.888061072	0.550027417	0.338033655	0.170824643	62.88687387
1	1	2	15	1	6	0	shirts	0	0	0	0	0	0	207.7032394	191.6468767	16.05636271	198.7306972	41.7543901	0.214888593	-0.169654509	0.384543102	92.38055888	90.98768501	1.392873867	91.19046363	4.003842904	0.297238248	-0.050645998	0.347884246	0.514721622	58.32669924
1	1	2	15	1	5	0	three	3	37.5	688	33.5	2	0	222.3818779	205.4375735	16.9443044	198.7306972	41.7543901	0.566435783	0.160626852	0.405808931	93.562745	92.19074763	1.371997366	91.19046363	4.003842904	0.592501111	0.249830981	0.34267013	0.219388568	59.42798283
1	1	2	15	0	6	0	shirts							184.8303912	96.19541433	88.63497686	198.7306972	41.7543901	-0.332906456	-2.4556767	2.122770244	90.36069822	79.0547546	11.30594362	91.19046363	4.003842904	-0.20724225	-3.031015283	2.823773033	0.571055538	55.50066043
1	1	3	16	1	7	1	must	0	0	0	0	0	0	204.4771955	173.7029808	30.77421472	198.7306972	41.7543901	0.137626205	-0.599403234	0.737029439	92.10955373	89.28581555	2.823738182	91.19046363	4.003842904	0.229551988	-0.475704998	0.705256986	0.592839772	57.9975768
1	1	3	16	1	8	1	may	1	0.99	186	0.97	1	0	175.5408841	169.671026	5.869858137	198.7306972	41.7543901	-0.555386226	-0.695966847	0.140580621	89.46798588	88.87919933	0.588786549	91.19046363	4.003842904	-0.430206127	-0.577261485	0.147055358	0.3213524	57.6530069
1	1	3	17	1	9	1	allows	2	1.98	196	1.03	1	0	206.7992546	85.9778572	120.8213974	198.7306972	41.7543901	0.193238539	-2.700382876	2.893621416	92.30508138	77.11071918	15.1943622	91.19046363	4.003842904	0.278386984	-3.516557665	3.794944648	0.55568086	60.71543347
1	1	3	17	1	10	1	requires	2	1.98	244	1.28	2	0	180.1686527	87.28141602	92.88723666	198.7306972	41.7543901	-0.444553124	-2.669163193	2.22461007	89.91845052	77.37123123	12.54721929	91.19046363	4.003842904	-0.317698057	-3.451492162	3.133794105	0.637608166	56.6033835
1	1	3	18	1	11	0	personal	4	5.56	678	4.66	3	0	235.6975892	185.0643869	50.63320228	198.7306972	41.7543901	0.885341442	-0.327302358	1.2126438	94.56952809	90.38248902	4.187039065	91.19046363	4.003842904	0.843955305	-0.201799778	1.045755084	0.470156926	59.32138794
1	1	3	18	1	12	0	group	2	2.78	226	1.55	2	1	195.162843	111.986575	83.176268	198.7306972	41.7543901	-0.085448602	-2.077485075	1.992036473	91.30246097	81.68619017	9.616270798	91.19046363	4.003842904	0.027972461	-2.373787806	2.401760267	0.464752823	53.42039768
1	1	3	19	1	13	0	group	1	1.39	178	1.22	1	0	225.1044901	178.0105741	47.093916	198.7306972	41.7543901	0.631641195	-0.496238194	1.127879389	93.77345554	89.70994417	4.063511368	91.19046363	4.003842904	0.645128186	-0.369774613	1.014902799	0.259396925	55.82059175
1	1	3	19	1	14	0	personal	2	2.78	376	2.59	1	0	208.0844881	166.3040706	41.78041745	198.7306972	41.7543901	0.224019339	-0.776604007	1.000623345	92.41230734	88.53233221	3.879975132	91.19046363	4.003842904	0.305167745	-0.663895034	0.969062779	0.43773231	56.54865357
1	2	1	1	1	1	0	blue	3	20	586	21.06	2	1	136.468692	99.19848274	37.27020927	124.4344326	56.94531394	0.211330108	-0.443161134	0.654491242	85.18033506	79.67554363	5.504791433	82.71012903	4.392050016	0.562426661	-0.690926877	1.253353539	0.243920856	59.36570059
1	2	1	1	0	2	0	drum							132.6424498	114.6756313	17.96681856	124.4344326	56.94531394	0.144138588	-0.171371455	0.315510044	84.61678505	82.09704571	2.519739344	82.71012903	4.392050016	0.434115279	-0.139589331	0.57370461	0.376044653	60.95897532
1	2	1	1	1	3	0	yellow	1	6.67	176	6.33	1	0	114.6832955	97.9732108	16.71008473	124.4344326	56.94531394	-0.171236867	-0.464677776	0.293440909	82.09891598	79.37231031	2.726605668	82.71012903	4.392050016	-0.1391635	-0.759968286	0.620804786	0.338778967	59.84465745
1	2	1	1	0	4	0	drum							52.00068789	51.79285777	0.207830124	124.4344326	56.94531394	-1.271987802	-1.275637446	0.003649644	68.40550564	68.33617511	0.069330528	82.71012903	4.392050016	-3.25693545	-3.27272091	0.01578546	0.145674956	56.64797099
1	2	1	2	0	1	0	blue							124.1376671	115.7716648	8.366002268	124.4344326	56.94531394	-0.005211413	-0.152124332	0.146912919	83.46956649	82.26027929	1.209287194	82.71012903	4.392050016	0.172911842	-0.102423638	0.27533548	0.194769731	63.8656422
1	2	1	2	1	2	0	drum	6	20.69	972	18.97	6	2	151.0001479	124.6668583	26.33328964	124.4344326	56.94531394	0.466512755	0.004081559	0.462431195	86.86087851	83.54321012	3.317668388	82.71012903	4.392050016	0.945059702	0.189679326	0.755380375	0.453051331	64.27042128
1	2	1	2	0	3	0	blue							108.2571262	99.80787106	8.449255128	124.4344326	56.94531394	-0.284084946	-0.432459844	0.148374898	81.09982405	79.69299024	1.406833806	82.71012903	4.392050016	-0.366640857	-0.686954561	0.320313704	0.177833233	58.06250552
1	2	1	2	1	4	0	ball	2	6.9	192	3.75	2	1	148.0419036	51.42585628	96.6160473	124.4344326	56.94531394	0.414563892	-1.282082252	1.696646144	86.51834138	68.21306465	18.30527672	82.71012903	4.392050016	0.86706944	-3.300751205	4.167820645	0.364134715	55.11664724
1	2	1	3	0	1	0	gold							125.7128075	112.5254791	13.1873284	124.4344326	56.94531394	0.022449167	-0.209129649	0.231578816	83.68785393	81.76939274	1.918461192	82.71012903	4.392050016	0.222612423	-0.214190706	0.436803129	0.201345362	61.40685951
1	2	1	3	1	2	0	sock	0	0	0	0	0	0	130.5418189	59.73946102	70.80235789	124.4344326	56.94531394	0.107250024	-1.136089471	1.243339495	84.34045044	70.8073478	13.53310264	82.71012903	4.392050016	0.371198279	-2.710074154	3.081272433	0.336732761	58.04111707
1	2	1	3	0	3	0	gold							104.8775165	102.3085086	2.569007942	124.4344326	56.94531394	-0.343433283	-0.388546879	0.045113596	80.55074262	80.12145374	0.429288878	82.71012903	4.392050016	-0.491657974	-0.589400231	0.097742257	0.173573588	62.11517314
1	2	1	3	1	4	0	star	0	0	0	0	0	0	103.6506953	50.26233522	53.38836011	124.4344326	56.94531394	-0.364977131	-1.302514505	0.937537374	80.34703181	67.81686955	12.53016226	82.71012903	4.392050016	-0.538039689	-3.390958534	2.852918845	0.291603628	53.50935296
1	2	1	4	1	1	0	gold	3	15	684	12.95	3	0	123.748387	97.99385526	25.75453175	124.4344326	56.94531394	-0.012047447	-0.464315245	0.452267798	83.41524803	79.37543518	4.039812854	82.71012903	4.392050016	0.160544392	-0.759256803	0.919801194	0.282149989	62.0934086
1	2	1	4	0	2	0	sock							124.5564649	109.2528763	15.30358855	124.4344326	56.94531394	0.002142973	-0.26659887	0.268741843	83.52789757	81.2585182	2.269379367	82.71012903	4.392050016	0.186192902	-0.330508721	0.516701623	0.317418738	60.34205624
1	2	1	4	1	3	0	red	1	5	166	3.14	1	0	103.3514241	64.63324601	38.71817813	124.4344326	56.94531394	-0.370232545	-1.050151145	0.679918599	80.4649616	72.17045452	8.294507082	82.71012903	4.392050016	-0.511188949	-2.399716414	1.888527464	0.206574099	59.40041456
1	2	1	4	0	4	0	sock							65.60304168	61.88334375	3.719697935	124.4344326	56.94531394	-1.033120847	-1.098441374	0.065320527	72.42828962	71.41775096	1.010538657	82.71012903	4.392050016	-2.341011458	-2.571095054	0.230083596	0.307341953	53.63411904
1	2	1	5	0	1	1	yellow							129.0819316	113.6421516	15.43978001	124.4344326	56.94531394	0.08161337	-0.18952009	0.27113346	84.14572522	81.93984352	2.205881695	82.71012903	4.392050016	0.326862441	-0.175381772	0.502244212	0.25886895	66.56960593
1	2	1	5	1	2	1	tree	2	9.52	370	8.73	1	0	134.72974	118.5613054	16.16843457	124.4344326	56.94531394	0.180792881	-0.103136269	0.28392915	84.8870944	82.67387374	2.213220655	82.71012903	4.392050016	0.495660423	-0.008254754	0.503915177	0.374678744	59.47262065
1	2	1	5	0	3	1	yellow							99.28932738	90.9225815	8.366745876	124.4344326	56.94531394	-0.441565838	-0.588491815	0.146925977	79.60280095	78.07880089	1.524000053	82.71012903	4.392050016	-0.70748923	-1.054479827	0.346990598	0.183933202	61.63104088
1	2	1	5	1	4	1	star	1	4.76	134	3.16	1	0	95.60936696	94.86390639	0.745460577	124.4344326	56.94531394	-0.506188546	-0.519279361	0.013090815	78.94798164	78.81344848	0.134533164	82.71012903	4.392050016	-0.856581182	-0.887212245	0.030631063	0.579573876	54.25026042
1	2	1	6	1	1	1	yellow	5	26.32	842	21.75	4	2	139.3875212	104.3425253	35.04499586	124.4344326	56.94531394	0.262586814	-0.352828107	0.615414921	85.47553018	80.46217256	5.013357625	82.71012903	4.392050016	0.6296379	-0.511823969	1.141461869	0.425678386	66.34041564
1	2	1	6	0	2	1	tree							151.604164	133.3225804	18.28158365	124.4344326	56.94531394	0.477119705	0.156082163	0.321037542	86.93001864	84.70538961	2.224629028	82.71012903	4.392050016	0.960801811	0.454289129	0.506512681	0.190343994	62.46534547
1	2	1	6	1	3	1	white	2	10.53	476	12.29	2	2	96.93440543	75.80513954	21.12926589	124.4344326	56.94531394	-0.482919933	-0.853964791	0.371044857	79.18868293	74.93060331	4.258079628	82.71012903	4.392050016	-0.801777323	-1.771274392	0.96949707	0.238795192	58.10914644
1	2	1	6	0	4	1	tree							--undefined--	--undefined--	#VALUE!	124.4344326	56.94531394	#VALUE!	#VALUE!	#VALUE!	--undefined--	--undefined--	#VALUE!	82.71012903	4.392050016	#VALUE!	#VALUE!	#VALUE!	0.231873592	49.58788247
1	2	1	7	0	1	1	brown							109.8454101	103.1357834	6.709626737	124.4344326	56.94531394	-0.256193557	-0.374019349	0.117825792	81.3515973	80.26082528	1.090772013	82.71012903	4.392050016	-0.309316089	-0.557667546	0.248351457	0.198733911	65.29773787
1	2	1	7	1	2	1	angel	2	9.52	216	4.97	2	0	147.320503	105.2591546	42.06134849	124.4344326	56.94531394	0.401895587	-0.336731448	0.738627035	86.43378817	80.61356087	5.820227305	82.71012903	4.392050016	0.847818018	-0.477355257	1.325173274	0.520682847	61.08921457
1	2	1	7	0	3	1	brown							106.7233016	95.5075631	11.2157385	124.4344326	56.94531394	-0.311019991	-0.507976294	0.196956303	80.85271383	78.93069791	1.922015916	82.71012903	4.392050016	-0.422903928	-0.860516412	0.437612485	0.162961807	63.07337734
1	2	1	7	1	4	1	egg	1	4.76	68	1.56	1	0	140.4054853	98.65828275	41.74720252	124.4344326	56.94531394	0.280462984	-0.452647428	0.733110412	85.60146642	79.49241925	6.10904717	82.71012903	4.392050016	0.65831158	-0.732621389	1.390932969	0.393493144	54.60827311
1	2	1	8	1	1	1	brown	4	25	894	23.22	3	1	132.0156883	97.90046983	34.11521852	124.4344326	56.94531394	0.133132213	-0.465955159	0.599087372	84.5347948	79.35892654	5.175868259	82.71012903	4.392050016	0.415447402	-0.763015558	1.17846296	0.310776904	64.73150745
1	2	1	8	0	2	1	angel							99.96306457	94.38997424	5.573090335	124.4344326	56.94531394	-0.429734536	-0.527601945	0.097867409	79.71992232	78.72613882	0.993783494	82.71012903	4.392050016	-0.680822555	-0.907091267	0.226268712	0.169157049	58.46681036
1	2	1	8	1	3	1	green	1	6.25	414	10.75	1	0	137.9946697	54.02152039	83.97314936	124.4344326	56.94531394	0.238127356	-1.236500554	1.474627911	85.75552834	69.06554806	16.68998028	82.71012903	4.392050016	0.693389032	-3.106654278	3.80004331	0.267504171	57.55341296
1	2	1	8	0	4	1	angel							52.03354164	50.44478312	1.588758513	124.4344326	56.94531394	-1.271410867	-1.299310591	0.027899724	68.41545619	67.87959806	0.535858127	82.71012903	4.392050016	-3.254669867	-3.376676249	0.122006382	0.141619855	58.48098548
1	2	1	9	0	1	2	blue							125.0272969	113.6046333	11.42266361	124.4344326	56.94531394	0.010411116	-0.190178938	0.200590054	83.59384148	81.93453438	1.659307105	82.71012903	4.392050016	0.201207282	-0.176590578	0.377797861	0.142054909	61.71772788
1	2	1	9	1	2	2	egg	2	9.52	532	12.98	2	0	138.9033021	64.68321797	74.22008416	124.4344326	56.94531394	0.254083584	-1.049273602	1.303357186	85.41524504	72.18383459	13.23141045	82.71012903	4.392050016	0.615911931	-2.396669984	3.012581916	0.372894137	56.5499733
1	2	1	9	0	3	2	blue							115.7783824	109.8640122	5.914370199	124.4344326	56.94531394	-0.152006366	-0.255866891	0.103860525	82.26278915	81.3549046	0.907884558	82.71012903	4.392050016	-0.101852183	-0.308563069	0.206710886	0.088784318	60.02997783
1	2	1	9	1	4	2	sock	0	0	0	0	0	0	141.4204654	110.6477865	30.77267881	124.4344326	56.94531394	0.298286753	-0.24210326	0.540390012	85.72616522	81.4779568	4.248208415	82.71012903	4.392050016	0.686703516	-0.280546038	0.967249554	0.310745114	56.30130152
1	2	1	10	1	1	2	blue	6	35.29	1320	32.5	6	2	135.5093602	66.36709242	69.14226774	124.4344326	56.94531394	0.194483563	-1.019703575	1.214187138	84.98698438	72.62875341	12.35823097	82.71012903	4.392050016	0.518403784	-2.295369039	2.813772823	0.369096567	60.798266
1	2	1	10	0	2	2	egg							129.2539911	123.5942558	5.659735285	124.4344326	56.94531394	0.084634856	-0.0147541	0.099388956	84.16888531	83.39370192	0.775183395	82.71012903	4.392050016	0.332135625	0.155638685	0.17649694	0.259365155	61.46816791
1	2	1	10	1	3	2	brown	2	11.76	368	9.06	2	1	139.4740821	97.58517898	41.88890316	124.4344326	56.94531394	0.264106885	-0.471491889	0.735598774	85.48623896	79.30308175	6.183157212	82.71012903	4.392050016	0.632076119	-0.775730529	1.407806648	0.259365155	60.72273701
1	2	1	10	0	4	2	egg							68.22925269	66.68000858	1.549244108	124.4344326	56.94531394	-0.987002723	-1.014208546	0.027205823	73.10830018	72.71018827	0.398111913	82.71012903	4.392050016	-2.186183859	-2.276827615	0.090643756	0.1745727	54.54039772
1	2	1	11	0	1	2	green							129.3986555	111.7916114	17.60704408	124.4344326	56.94531394	0.087175266	-0.222016885	0.309192151	84.18814779	81.65601751	2.532130285	82.71012903	4.392050016	0.336521386	-0.240004444	0.57652583	0.314392004	65.0839294
1	2	1	11	1	2	2	bell	2	11.76	358	9.86	2	1	132.9449789	109.0283482	23.91663068	124.4344326	56.94531394	0.149451213	-0.270541742	0.419992955	84.65750653	81.22307172	3.43443481	82.71012903	4.392050016	0.443386913	-0.338579321	0.781966234	0.503507718	63.02725857
1	2	1	11	0	3	2	green							107.1013896	98.87124655	8.230143018	124.4344326	56.94531394	-0.304380498	-0.448907633	0.144527135	80.91355271	79.5297494	1.383803312	82.71012903	4.392050016	-0.409051882	-0.724121907	0.315070025	0.170557288	58.92490319
1	2	1	11	1	4	2	egg	1	5.88	126	3.47	1	0	129.0349862	90.77035666	38.26462949	124.4344326	56.94531394	0.080788975	-0.59116499	0.671953966	84.13942172	78.04989483	6.08952689	82.71012903	4.392050016	0.325427234	-1.061061278	1.386488512	0.306227858	53.02061986
1	2	1	12	1	1	2	green	4	26.67	822	20.68	4	1	121.4087781	102.7194449	18.68933317	124.4344326	56.94531394	-0.053132634	-0.381330547	0.328197913	83.08475259	80.190796	2.893956591	82.71012903	4.392050016	0.085295831	-0.5736121	0.658907931	0.429328762	59.80951304
1	2	1	12	0	2	2	bell							128.0875216	111.1752324	16.9122892	124.4344326	56.94531394	0.064150827	-0.232840937	0.296991763	84.01185814	81.56032946	2.451528682	82.71012903	4.392050016	0.296383034	-0.261791093	0.558174126	0.314622604	63.63936993
1	2	1	12	1	3	2	silver	2	13.33	610	15.35	2	1	108.7617342	91.09176211	17.66997209	124.4344326	56.94531394	-0.275223672	-0.585520883	0.310297211	81.180327	78.11158127	3.068745729	82.71012903	4.392050016	-0.348311615	-1.047016256	0.698704641	0.4883205	55.82111842
1	2	1	12	0	4	2	bell							68.05091035	54.31892408	13.73198627	124.4344326	56.94531394	-0.990134541	-1.231277935	0.241143394	73.06392236	69.16059598	3.903326378	82.71012903	4.392050016	-2.196287983	-3.085013377	0.888725394	0.629245209	48.08154733
1	2	2	13	1	5	0	brother	10	50	3252	60.36	6	1	133.1228025	102.8358795	30.28692306	124.4344326	56.94531394	0.152573922	-0.379285873	0.531859795	84.67936784	80.21092784	4.468440005	82.71012903	4.392050016	0.448364386	-0.5690284	1.017392786	0.405158244	66.61067093
1	2	2	13	0	6	0	doctor							103.0936532	96.99935313	6.094300095	124.4344326	56.94531394	-0.374759185	-0.481779406	0.107020221	80.2537405	79.19883865	1.054901846	82.71012903	4.392050016	-0.559280637	-0.799465027	0.240184389	0.177301854	56.21222792
1	2	2	13	0	5	0	brother							118.3941814	108.0145988	10.37958259	124.4344326	56.94531394	-0.106071085	-0.288343899	0.182272814	82.64945958	81.06017602	1.589283563	82.71012903	4.392050016	-0.01381347	-0.375668084	0.361854613	0.291765685	67.25465106
1	2	2	13	1	6	0	doctor	2	11.76	396	7.82	2	0	105.2336829	102.8545178	2.379165038	124.4344326	56.94531394	-0.337178749	-0.378958572	0.041779822	80.60943325	80.21353626	0.395896997	82.71012903	4.392050016	-0.47829505	-0.568434504	0.090139454	0.241569438	58.38030947
1	2	2	14	0	5	0	He							123.1736162	118.3124883	4.861127932	124.4344326	56.94531394	-0.022140829	-0.107505674	0.085364845	83.3346364	82.64682444	0.687811962	82.71012903	4.392050016	0.142190404	-0.01441345	0.156603854	0.080672839	58.46151713
1	2	2	14	1	6	0	study	1	6.25	114	2.94	1	0	101.6306916	57.36597937	44.26471226	124.4344326	56.94531394	-0.400449826	-1.177769488	0.777319663	80.00629176	70.10548977	9.900801992	82.71012903	4.392050016	-0.615620784	-2.869876075	2.254255292	0.553953498	55.46985369
1	2	2	14	1	5	0	He	2	11.76	394	12.03	2	1	161.4382643	54.33382148	107.1044428	124.4344326	56.94531394	0.649813463	-1.231016326	1.880829789	88.01809585	69.16534338	18.85275247	82.71012903	4.392050016	1.208539702	-3.08393247	4.292472172	0.320181755	58.48881056
1	2	2	14	0	6	0	study							130.512475	130.296792	0.215682953	124.4344326	56.94531394	0.106734724	0.102947178	0.003787546	84.33641198	84.30789305	0.028518929	82.71012903	4.392050016	0.370278786	0.363785479	0.006493307	0.408742666	54.61482549
1	2	2	15	0	5	0	three							138.9689081	122.0057062	16.96320194	124.4344326	56.94531394	0.255235672	-0.042650154	0.297885826	85.42341997	83.16965798	2.253761996	82.71012903	4.392050016	0.617773233	0.104627439	0.513145793	0.229020376	63.24876406
1	2	2	15	1	6	0	shirts	1	5.88	180	5.11	1	0	153.2503619	62.12726818	91.12309369	124.4344326	56.94531394	0.506028104	-1.094157888	1.600185993	87.11696004	71.48540804	15.631552	82.71012903	4.392050016	1.003365397	-2.555690612	3.559056009	0.489413407	57.33671642
1	2	2	15	1	5	0	three	3	21.43	546	17.62	3	0	137.3919225	118.1269398	19.26498276	124.4344326	56.94531394	0.227542689	-0.110764036	0.338306726	85.22584054	82.61033059	2.615509953	82.71012903	4.392050016	0.572787536	-0.02272252	0.595510056	0.329144471	59.79542231
1	2	2	15	0	6	0	shirts							130.5697255	129.610729	0.95899655	124.4344326	56.94531394	0.107740083	0.090899426	0.016840657	84.34416832	84.21650573	0.12766259	82.71012903	4.392050016	0.372044781	0.342978038	0.029066743	0.490489801	54.36670124
1	2	3	16	1	7	1	must	0	0	0	0	0	0	139.2266033	92.00474479	47.22185851	124.4344326	56.94531394	0.259760982	-0.569488262	0.829249244	85.45617623	78.28392021	7.172256014	82.71012903	4.392050016	0.625231313	-1.007777418	1.63300873	0.410322653	61.31581443
1	2	3	16	1	8	1	may	1	0.99	366	2.04	1	0	128.8246511	95.91912518	32.90552589	124.4344326	56.94531394	0.077095342	-0.500748973	0.577844315	84.11117956	79.0050006	5.106178967	82.71012903	4.392050016	0.318996943	-0.843598871	1.162595813	0.393460078	63.12420816
1	2	3	17	1	9	1	allow	2	1.98	564	3.14	2	0	139.8983374	92.67811648	47.22022096	124.4344326	56.94531394	0.271557108	-0.557663378	0.829220486	85.53886887	78.41007714	7.128791736	82.71012903	4.392050016	0.644059113	-0.979053489	1.623112602	0.404701794	65.99683584
1	2	3	17	1	10	1	requires	4	3.96	648	3.6	3	0	129.954338	54.54701963	75.40731835	124.4344326	56.94531394	0.096933443	-1.227272416	1.324205859	84.26234265	69.2331416	15.02920105	82.71012903	4.392050016	0.353414376	-3.068495892	3.421910269	0.629536125	61.11227735
1	2	3	18	1	11	0	personal	2	2.25	318	1.83	2	0	138.6934305	127.8824012	10.81102926	124.4344326	56.94531394	0.25039809	0.060548767	0.189849323	85.38906771	83.98413461	1.404933101	82.71012903	4.392050016	0.609951769	0.290070826	0.319880943	0.446788631	64.83093037
1	2	3	18	1	12	0	group	1	1.12	358	2.05	1	0	132.6538657	122.8777223	9.776143414	124.4344326	56.94531394	0.14433906	-0.027336935	0.171675994	84.61828531	83.29305573	1.325229587	82.71012903	4.392050016	0.434456864	0.132723146	0.301733718	0.213681519	54.69222029
1	2	3	19	1	13	0	group	2	2.25	438	2.51	1	0	119.4321577	68.32593554	51.10622218	124.4344326	56.94531394	-0.087843487	-0.985304904	0.897461417	82.80057038	73.13242963	9.668140749	82.71012903	4.392050016	0.020592058	-2.180689967	2.201282024	0.252532704	54.77836393
1	2	3	19	1	14	0	personal	1	1.12	290	1.66	1	0	129.4117772	69.59219202	59.81958517	124.4344326	56.94531394	0.087405692	-0.963068544	1.050474236	84.18990128	73.45024254	10.73965874	82.71012903	4.392050016	0.336920627	-2.108329017	2.445249645	0.401462248	57.70606649
1	3	1	1	1	1	0	blue	0	0	0	0	0	0	211.9209444	185.1330547	26.7878897	190.4587246	73.15596961	0.293376192	-0.072798843	0.366175035	92.72858841	90.3888864	2.339702009	89.68852746	6.552250609	0.46397202	0.106888302	0.357083718	0.286064277	58.14244407
1	3	1	1	0	2	0	drum							207.8229201	194.834988	12.98793208	190.4587246	73.15596961	0.237358558	0.059821001	0.177537557	92.39053155	91.27331056	1.117220992	89.68852746	6.552250609	0.412378014	0.241868512	0.170509502	0.252690111	61.05822198
1	3	1	1	1	3	0	yellow	0	0	0	0	0	0	204.9334797	86.61948215	118.3139976	190.4587246	73.15596961	0.197861571	-1.419422681	1.617284251	92.14817606	77.23930712	14.90886895	89.68852746	6.552250609	0.375389885	-1.899991481	2.275381366	0.324206181	59.02722661
1	3	1	1	0	4	0	drum							200.4162534	185.5066266	14.90962681	190.4587246	73.15596961	0.136113687	-0.06769233	0.203806017	91.76226955	90.42393393	1.33833562	89.68852746	6.552250609	0.316493098	0.112237232	0.204255866	0.23361916	56.09241719
1	3	1	2	0	1	0	blue							189.2685396	177.2382852	12.03025435	190.4587246	73.15596961	-0.016269145	-0.180715798	0.164446654	90.77148384	89.63460172	1.136882119	89.68852746	6.552250609	0.165280061	-0.008230109	0.17351017	0.194716483	60.19557134
1	3	1	2	1	2	0	drum	0	0	0	0	0	0	196.4250744	89.16330951	107.2617648	190.4587246	73.15596961	0.081556567	-1.384650025	1.466206592	91.41402356	77.74052647	13.67349709	89.68852746	6.552250609	0.263344033	-1.823495727	2.08683976	0.345553196	58.72994338
1	3	1	2	0	3	0	blue							93.40820588	83.46625532	9.941950556	190.4587246	73.15596961	-1.326624735	-1.462525477	0.135900742	78.54572869	76.59745611	1.948272582	89.68852746	6.552250609	-1.700606316	-1.997950342	0.297344027	0.186489026	55.5275208
1	3	1	2	1	4	0	ball	0	0	0	0	0	0	236.8486115	177.349836	59.49877551	190.4587246	73.15596961	0.634123054	-0.179190963	0.813314017	94.65385685	89.64548655	5.008370298	89.68852746	6.552250609	0.757805171	-0.006568874	0.764374045	0.44428268	56.1061689
1	3	1	3	0	1	0	gold							183.6921969	180.0877159	3.60448105	190.4587246	73.15596961	-0.09249454	-0.141765721	0.049271181	90.2537584	89.9106859	0.343072496	89.68852746	6.552250609	0.086265159	0.033905669	0.05235949	0.172214789	58.52955537
1	3	1	3	1	2	0	sock	0	0	0	0	0	0	217.5648576	183.4617834	34.10307417	190.4587246	73.15596961	0.370525237	-0.09564416	0.466169396	93.18362084	90.23202692	2.95159392	89.68852746	6.552250609	0.533418758	0.082948516	0.450470242	0.402179859	55.90226299
1	3	1	3	0	3	0	gold							90.79921765	85.42909024	5.370127414	190.4587246	73.15596961	-1.362288102	-1.435694653	0.073406551	78.05529554	76.9997032	1.05559234	89.68852746	6.552250609	-1.775455887	-1.936559667	0.16110378	0.14690402	55.62670681
1	3	1	3	1	4	0	star	0	0	0	0	0	0	200.477087	84.81279614	115.6642909	190.4587246	73.15596961	0.136945247	-1.444119039	1.581064286	91.76761424	76.87452051	14.89309373	89.68852746	6.552250609	0.317308801	-1.955664963	2.272973764	0.582799556	56.26599044
1	3	1	4	1	1	0	gold	1	8.33	214	9.43	1	0	287.8747609	176.2172131	111.6575477	190.4587246	73.15596961	1.331621148	-0.194673266	1.526294414	98.03156997	89.5345344	8.49703557	89.68852746	6.552250609	1.273309434	-0.023502315	1.296811749	0.335941277	64.86434761
1	3	1	4	0	2	0	sock							222.5965128	215.4479827	7.148530046	190.4587246	73.15596961	0.439305067	0.341588775	0.097716292	93.57967593	93.01434936	0.565326574	89.68852746	6.552250609	0.593864415	0.507584661	0.086279754	0.203048502	59.11551162
1	3	1	4	1	3	0	red	0	0	0	0	0	0	184.796482	173.9106746	10.8858074	190.4587246	73.15596961	-0.077399598	-0.22620232	0.148802722	90.3575543	89.3064427	1.051111596	89.68852746	6.552250609	0.102106418	-0.058313514	0.160419932	0.174041573	57.34378849
1	3	1	4	0	4	0	sock							209.8591128	192.0028967	17.85621609	190.4587246	73.15596961	0.26519214	0.021107943	0.244084197	92.55932761	91.0198136	1.53951401	89.68852746	6.552250609	0.438139553	0.203179979	0.234959574	0.527926106	55.94035684
1	3	1	5	0	1	1	yellow							199.2149163	179.7252124	19.48970391	190.4587246	73.15596961	0.1196921	-0.146720935	0.266413035	91.65819058	89.87578908	1.782401501	89.68852746	6.552250609	0.300608637	0.028579741	0.272028896	0.297103654	60.32404831
1	3	1	5	1	2	1	tree	1	7.69	266	10.43	1	0	229.49239	96.12993363	133.3624563	190.4587246	73.15596961	0.53356774	-1.289420283	1.822988022	94.10763005	79.04326419	15.06436585	89.68852746	6.552250609	0.674440411	-1.624672788	2.299113199	0.413494777	58.48990853
1	3	1	5	0	3	1	yellow							95.8223288	82.42601769	13.39631111	190.4587246	73.15596961	-1.293625064	-1.476744926	0.183119863	78.9875424	76.38041578	2.607126619	89.68852746	6.552250609	-1.63317701	-2.031074889	0.397897879	0.248096866	58.18126795
1	3	1	5	1	4	1	star	0	0	0	0	0	0	211.9541651	89.81000044	122.1441647	190.4587246	73.15596961	0.293830299	-1.375810132	1.669640431	93.20044864	77.86591503	15.33453361	89.68852746	6.552250609	0.535987005	-1.804359011	2.340346016	0.578892688	55.4858943
1	3	1	6	1	1	1	yellow	0	0	0	0	0	0	221.5693219	179.3508601	42.21846179	190.4587246	73.15596961	0.425263959	-0.151838115	0.577102074	93.49937198	89.83971275	3.65965923	89.68852746	6.552250609	0.581608481	0.023073796	0.558534685	0.447594084	56.97285617
1	3	1	6	0	2	1	tree							207.7902101	199.1312195	8.658990591	190.4587246	73.15596961	0.236911431	0.118548013	0.118363418	92.38781461	91.64966116	0.738153445	89.68852746	6.552250609	0.411963356	0.299306882	0.112656474	0.190227485	59.62080089
1	3	1	6	1	3	1	white	0	0	0	0	0	0	210.3522908	86.78075299	123.5715378	190.4587246	73.15596961	0.2719336	-1.417218201	1.689151801	92.60008597	77.27163848	15.32844749	89.68852746	6.552250609	0.444360066	-1.895057091	2.339417157	0.32077576	56.51362771
1	3	1	6	0	4	1	tree							224.0239546	208.2934406	15.73051399	190.4587246	73.15596961	0.458817375	0.243790302	0.215027073	93.69007901	92.42968327	1.26039574	89.68852746	6.552250609	0.610714057	0.418353323	0.192360735	0.227526992	60.97692502
1	3	1	7	0	1	1	brown							187.5016588	175.3886175	12.11304132	190.4587246	73.15596961	-0.040421388	-0.205999691	0.165578303	90.60911458	89.45297018	1.156144404	89.68852746	6.552250609	0.140499376	-0.03595059	0.176449966	0.227164218	59.64520715
1	3	1	7	1	2	1	angel	1	6.67	278	9.13	1	0	183.6828375	75.98304767	107.6997898	190.4587246	73.15596961	-0.092622477	-1.564816618	1.472194141	90.27943582	75.73741861	14.54201721	89.68852746	6.552250609	0.09018403	-2.129208676	2.219392706	0.405995623	58.51556747
1	3	1	7	0	3	1	brown							88.68369215	82.67249985	6.011192295	190.4587246	73.15596961	-1.391206118	-1.473375657	0.082169539	77.64716316	76.43272405	1.214439111	89.68852746	6.552250609	-1.837744771	-2.023091636	0.185346865	0.183664687	56.62654815
1	3	1	7	1	4	1	egg	1	6.67	240	7.88	1	0	238.139735	202.3338802	35.80585484	190.4587246	73.15596961	0.651771969	0.162326542	0.489445427	94.74797576	91.92712926	2.820846506	89.68852746	6.552250609	0.772169534	0.341653874	0.430515661	0.289996874	54.98103569
1	3	1	8	1	1	1	brown	2	22.22	576	33.33	2	1	222.5535841	89.60429473	132.9492894	190.4587246	73.15596961	0.438718257	-1.378622011	1.817340267	93.57675053	77.82626484	15.75048569	89.68852746	6.552250609	0.593417942	-1.810410396	2.403828338	0.489282191	58.49476106
1	3	1	8	0	2	1	angel							221.1149171	199.2316716	21.88324548	190.4587246	73.15596961	0.419052507	0.119921136	0.299131371	93.46343071	91.65965598	1.803774738	89.68852746	6.552250609	0.576123149	0.300832285	0.275290864	0.18937748	61.1047311
1	3	1	8	1	3	1	green	1	11.11	266	15.39	1	0	199.1536464	90.6981189	108.4555275	190.4587246	73.15596961	0.118854576	-1.363670064	1.48252464	91.65285701	78.03567346	13.61718355	89.68852746	6.552250609	0.299794631	-1.778450595	2.078245226	0.27156016	56.16124211
1	3	1	8	0	4	1	angel							207.4221464	77.88939155	129.5327549	190.4587246	73.15596961	0.231880212	-1.538757995	1.770638207	92.86795787	76.20620488	16.66175299	89.68852746	6.552250609	0.485242492	-2.057662837	2.542905329	0.403767079	54.69885242
1	3	1	9	0	1	2	blue							182.4804492	170.7820918	11.6983574	190.4587246	73.15596961	-0.109058434	-0.268968246	0.159909813	90.13917712	88.9921547	1.147022414	89.68852746	6.552250609	0.068777843	-0.106279933	0.175057776	0.159246479	62.12758517
1	3	1	9	1	2	2	egg	3	30	312	17.39	2	1	206.2305215	97.48270954	108.747812	190.4587246	73.15596961	0.215591386	-1.270928615	1.48652	92.25739052	79.28489341	12.97249711	89.68852746	6.552250609	0.392058121	-1.587795502	1.979853623	0.213202412	58.82085047
1	3	1	9	0	3	2	blue							85.39332955	52.96896884	32.4243607	190.4587246	73.15596961	-1.436183481	-1.87940583	0.443222349	76.99261769	68.89234497	8.100272715	89.68852746	6.552250609	-1.937641053	-3.173899127	1.236258074	0.144816733	55.53982044
1	3	1	9	1	4	2	sock	1	10	230	12.82	1	0	219.4450751	86.57117684	132.8738983	190.4587246	73.15596961	0.396226728	-1.420082987	1.816309714	93.33265599	78.05921807	15.27343791	89.68852746	6.552250609	0.556164401	-1.774857233	2.331021634	0.33790571	57.80037802
1	3	1	10	1	1	2	blue	2	18.18	270	18.34	2	0	219.32156	188.2611866	31.06037342	190.4587246	73.15596961	0.394538347	-0.03003908	0.424577428	93.32433151	90.67911248	2.645219034	89.68852746	6.552250609	0.554893924	0.151182408	0.403711517	0.285221203	59.5843291
1	3	1	10	0	2	2	egg							194.2545303	188.5431268	5.711403475	190.4587246	73.15596961	0.051886479	-0.02618512	0.078071599	91.22165321	90.70501017	0.51664304	89.68852746	6.552250609	0.233984602	0.155134895	0.078849707	0.156411627	57.47931568
1	3	1	10	1	3	2	brown	0	0	0	0	0	0	166.7386985	93.50497127	73.23372723	190.4587246	73.15596961	-0.324239106	-1.325302007	1.001062902	88.5770994	78.56372327	10.01337612	89.68852746	6.552250609	-0.169625389	-1.697859995	1.528234606	0.285221203	54.42067708
1	3	1	10	0	4	2	egg							196.2951756	190.7783103	5.516865328	190.4587246	73.15596961	0.079780925	0.004368552	0.075412373	91.40269178	90.90904231	0.493649469	89.68852746	6.552250609	0.261614585	0.186274141	0.075340444	0.128809575	57.60944122
1	3	1	11	0	1	2	green							193.8111178	178.139954	15.6711638	190.4587246	73.15596961	0.045825285	-0.168390505	0.21421579	91.18180391	89.72240788	1.459396032	89.68852746	6.552250609	0.227902829	0.005170807	0.222732022	0.219182055	59.69371104
1	3	1	11	1	2	2	bell	2	16.67	292	17.57	2	0	210.0611959	180.5794582	29.48173771	190.4587246	73.15596961	0.2679545	-0.135043886	0.402998386	92.57599341	89.95776924	2.618224171	89.68852746	6.552250609	0.440683076	0.041091496	0.399591579	0.306159061	61.59045494
1	3	1	11	0	3	2	green							174.0472504	156.9527285	17.09452189	190.4587246	73.15596961	-0.224335407	-0.458007683	0.233672276	89.32002254	87.53023559	1.789786958	89.68852746	6.552250609	-0.056240968	-0.329397026	0.273156058	0.219182055	54.27341763
1	3	1	11	1	4	2	egg	0	0	0	0	0	0	203.9716596	94.91954199	109.0521176	190.4587246	73.15596961	0.184714043	-1.30596564	1.490679683	92.06669884	78.82359881	13.24310003	89.68852746	6.552250609	0.362954887	-1.658197968	2.021152856	0.247014697	62.08987651
1	3	1	12	1	1	2	green	1	9.09	144	7.6	1	0	219.9952466	100.4929348	119.5023118	190.4587246	73.15596961	0.403747255	-1.229780568	1.633527823	93.3759425	79.81140319	13.56453931	89.68852746	6.552250609	0.562770758	-1.50743994	2.070210698	0.298583758	59.56871885
1	3	1	12	0	2	2	bell							205.6991375	200.3269356	5.372201832	190.4587246	73.15596961	0.208327672	0.134892764	0.073434908	92.21270591	91.75455171	0.458154198	89.68852746	6.552250609	0.385238387	0.315315206	0.06992318	0.17737933	61.19607594
1	3	1	12	1	3	2	silver	0	0	0	0	0	0	250.639109	78.38897421	172.2501347	190.4587246	73.15596961	0.822631218	-1.531928987	2.354560205	95.63361283	75.51094066	20.12267217	89.68852746	6.552250609	0.907334857	-2.163773586	3.071108444	0.665780141	56.79234529
1	3	1	12	0	4	2	bell							240.0392983	202.458145	37.5811533	190.4587246	73.15596961	0.677737906	0.16402517	0.513712736	94.88562899	91.9379701	2.947658885	89.68852746	6.552250609	0.793178076	0.343308395	0.449869681	0.239264738	56.28390168
1	3	2	13	1	5	0	brother	3	25	636	34.38	2	0	230.4680759	186.5641663	43.90390958	190.4587246	73.15596961	0.546904804	-0.053236371	0.600141176	94.18107737	90.52239961	3.658677761	89.68852746	6.552250609	0.68564989	0.127264997	0.558384894	0.412933462	60.10387933
1	3	2	13	0	6	0	doctor							198.0665663	190.7373015	7.329264798	190.4587246	73.15596961	0.103994817	0.003807985	0.100186831	91.55809876	90.90531842	0.652780341	89.68852746	6.552250609	0.285332692	0.185705803	0.099626888	0.297554995	48.55554808
1	3	2	13	0	5	0	brother							250.1078464	202.1423562	47.96549015	190.4587246	73.15596961	0.815369164	0.159708519	0.655660645	95.59689474	91.91072949	3.686165258	89.68852746	6.552250609	0.901730968	0.339150952	0.562580016	0.202651049	61.90337337
1	3	2	13	1	6	0	doctor	1	12.5	122	13.77	1	0	119.5674682	69.30250038	50.26496786	190.4587246	73.15596961	-0.969042675	-1.656135855	0.68709318	82.82017327	73.37802599	9.44214728	89.68852746	6.552250609	-1.048243512	-2.489297562	1.44105405	0.51911981	53.45014336
1	3	2	14	0	5	0	He							103.7892472	96.92284786	6.866399327	190.4587246	73.15596961	-1.184721875	-1.278581602	0.093859727	80.36967155	79.18540412	1.184267432	89.68852746	6.552250609	-1.422237406	-1.60297949	0.180742084	0.042941985	57.38998779
1	3	2	14	1	6	0	study	0	0	0	0	0	0	233.0203267	90.66446633	142.3558604	190.4587246	73.15596961	0.581792604	-1.364130075	1.945922679	94.37175898	78.02958394	16.34217504	89.68852746	6.552250609	0.714751587	-1.779379974	2.494131561	0.478087436	54.87926545
1	3	2	14	1	5	0	He	0	0	0	0	0	0	258.4682876	195.7016263	62.76666123	190.4587246	73.15596961	0.929651583	0.071667448	0.857984135	96.16615623	91.35030924	4.815846987	89.68852746	6.552250609	0.988611266	0.253619997	0.734991269	0.116593754	52.84445617
1	3	2	14	0	6	0	study							326.0202221	162.0018862	164.0183359	190.4587246	73.15596961	1.853047648	-0.388988603	2.242036252	100.1858117	88.17509538	12.01071634	89.68852746	6.552250609	1.602088331	-0.230978967	1.833067298	0.369213555	59.74442464
1	3	2	15	0	5	0	three							220.594131	205.8934934	14.70063763	190.4587246	73.15596961	0.411933661	0.210984405	0.200949255	93.42430843	92.22927718	1.19503125	89.68852746	6.552250609	0.570152333	0.387767482	0.182384851	0.315772648	55.36434557
1	3	2	15	1	6	0	shirts	0	0	0	0	0	0	268.0349482	50.98935327	217.0455949	190.4587246	73.15596961	1.060422327	-1.906466036	2.966888363	96.79532773	68.12024847	28.67507926	89.68852746	6.552250609	1.08463499	-3.291735966	4.376370956	0.689234529	50.65992143
1	3	2	15	1	5	0	three	1	14.29	140	11.97	1	0	316.5201434	222.2842546	94.23588884	190.4587246	73.15596961	1.72318704	0.435036677	1.288150363	99.67392634	93.55514561	6.118780732	89.68852746	6.552250609	1.523964738	0.590120614	0.933844124	0.356896309	55.57109492
1	3	2	15	0	6	0	shirts							67.39266863	51.73862726	15.65404137	190.4587246	73.15596961	-1.682242156	-1.896223892	0.213981736	72.90701751	68.31803846	4.588979049	89.68852746	6.552250609	-2.561182554	-3.261549393	0.700366839	0.628255486	50.29611736
1	3	3	16	1	7	1	must	0	0	0	0	0	0	225.2971496	173.9816115	51.31553805	190.4587246	73.15596961	0.476221218	-0.225232653	0.701453871	93.78846981	89.31349281	4.474976996	89.68852746	6.552250609	0.625730394	-0.057237531	0.682967925	0.279643845	60.89915436
1	3	3	16	1	8	1	may	0	0	0	0	0	0	217.761972	186.5747885	31.18718356	190.4587246	73.15596961	0.373219677	-0.053091172	0.426310849	93.19931809	90.52334076	2.675977334	89.68852746	6.552250609	0.535814462	0.127408634	0.408405827	0.254256007	63.98118084
1	3	3	17	1	9	1	allows	4	5.8	600	4.36	3	1	234.6568404	53.93378988	180.7230506	190.4587246	73.15596961	0.604162804	-1.866217282	2.470380086	94.49290513	69.03743698	25.45546814	89.68852746	6.552250609	0.73324083	-3.151755284	3.884996113	0.45263019	61.01230585
1	3	3	17	1	10	1	requires	3	4.35	732	5.32	3	1	216.4357057	76.8481941	139.5875116	190.4587246	73.15596961	0.35509038	-1.552990565	1.908080945	93.09353413	75.16731738	17.92621676	89.68852746	6.552250609	0.519669786	-2.216217136	2.735886922	0.540113336	57.21136319
1	3	3	18	1	11	0	personal	0	0	0	0	0	0	313.6301699	80.4864996	233.1436703	190.4587246	73.15596961	1.683682766	-1.503257022	3.186939788	99.51504644	75.9680989	23.54694755	89.68852746	6.552250609	1.499716596	-2.094002409	3.593719005	0.390045921	63.06817326
1	3	3	18	1	12	0	group	1	1.92	190	1.74	1	0	219.9023419	191.922323	27.98001889	190.4587246	73.15596961	0.402477302	0.020006547	0.382470755	93.36863291	91.01278206	2.355850851	89.68852746	6.552250609	0.561655173	0.20210683	0.359548343	0.360042388	57.95855262
1	3	3	19	1	13	0	group	1	1.92	86	0.79	1	0	265.0119792	180.9642175	84.0477617	190.4587246	73.15596961	1.019100081	-0.129784448	1.148884529	96.59900758	89.99472792	6.604279658	89.68852746	6.552250609	1.054672743	0.046732105	1.007940638	0.32403815	59.45446632
1	3	3	19	1	14	0	personal	1	1.92	136	1.25	1	0	231.4572308	47.70618289	183.7510479	190.4587246	73.15596961	0.560425983	-1.951345085	2.511771068	94.25522188	67.12656278	27.1286591	89.68852746	6.552250609	0.696965775	-3.443391595	4.14035737	0.42605016	57.87682905
1	4	1	1	1	1	0	blue	1	6.25	94	2.71	1	0	230.8435474	68.61516733	162.2283801	177.3239757	93.77897406	0.570699053	-1.159202363	1.729901417	94.20925915	73.42843522	20.78082393	87.79030979	7.670420355	0.836844536	-1.872371253	2.709215788	0.570949678	49.97097249
1	4	1	1	0	2	0	drum							113.4374465	69.11212938	44.32531711	177.3239757	93.77897406	-0.681245768	-1.153903073	0.472657305	81.90903922	73.33040471	8.578634509	87.79030979	7.670420355	-0.76674684	-1.885151583	1.118404743	0.395771936	49.65687246
1	4	1	1	1	3	0	yellow	1	6.25	354	10.22	1	0	207.232522	73.47100319	133.7615188	177.3239757	93.77897406	0.318925928	-1.107422784	1.426348711	92.34128837	74.38923682	17.95205155	87.79030979	7.670420355	0.593315408	-1.747110634	2.340426042	0.447676452	50.05743832
1	4	1	1	0	4	0	drum							250.4778773	237.2805809	13.19729639	177.3239757	93.77897406	0.780067199	0.63933953	0.140727669	95.62247253	94.68540387	0.93706866	87.79030979	7.670420355	1.021086509	0.898919976	0.122166533	0.476872743	46.35682929
1	4	1	2	0	1	0	blue							108.7742819	106.3257292	2.448552698	177.3239757	93.77897406	-0.730970822	-0.757080648	0.026109826	81.18232418	80.78816317	0.394161013	87.79030979	7.670420355	-0.861489371	-0.912876517	0.051387146	0.13883886	50.3743027
1	4	1	2	1	2	0	drum	5	31.25	1248	33.95	3	2	223.3672357	105.6061889	117.7610469	177.3239757	93.77897406	0.490976367	-0.764753374	1.255729741	93.63928526	80.67062255	12.96866271	87.79030979	7.670420355	0.762536497	-0.9282004	1.690736897	0.394302362	48.42162163
1	4	1	2	0	3	0	blue							108.2255253	104.8422267	3.383298537	177.3239757	93.77897406	-0.736822418	-0.772899786	0.036077368	81.09476391	80.54429136	0.550472549	87.79030979	7.670420355	-0.872904687	-0.944670317	0.07176563	0.183267295	50.98108819
1	4	1	2	1	4	0	ball	5	31.25	1192	32.43	2	1	269.1146707	72.76455742	196.3501133	177.3239757	93.77897406	0.978798243	-1.114955877	2.09375412	96.86492677	74.22196803	22.64295875	87.79030979	7.670420355	1.18306645	-1.768917625	2.951984075	0.338766818	48.56951474
1	4	1	3	0	1	0	gold							113.8969754	109.6308287	4.26614667	177.3239757	93.77897406	-0.676345641	-0.721837146	0.045491505	81.97902751	81.31811685	0.660910652	87.79030979	7.670420355	-0.7576224	-0.843785952	0.086163552	0.099322456	50.35266169
1	4	1	3	1	2	0	sock	1	7.69	172	5.16	1	0	107.8107297	74.34275497	33.46797472	177.3239757	93.77897406	-0.741245537	-1.098126971	0.356881434	81.02828348	74.59344296	6.43484052	87.79030979	7.670420355	-0.881571804	-1.720488085	0.838916281	0.412808958	48.10971441
1	4	1	3	0	3	0	gold							109.3745162	70.20910239	39.1654138	177.3239757	93.77897406	-0.724570301	-1.142205642	0.417635341	81.2775939	73.60303799	7.674555912	87.79030979	7.670420355	-0.849068967	-1.849608123	1.000539156	0.155191337	48.51219371
1	4	1	3	1	4	0	star	0	0	0	0	0	0	272.1860919	107.8145745	164.3715174	177.3239757	93.77897406	1.011549947	-0.741204538	1.752754485	97.0616246	81.0288834	16.0327412	87.79030979	7.670420355	1.208710133	-0.881493592	2.090203725	0.45539146	46.55857459
1	4	1	4	1	1	0	gold	2	11.76	310	9.25	1	0	107.82487	46.37658623	61.44828374	177.3239757	93.77897406	-0.741094754	-1.396340606	0.655245852	81.03059141	67.25611146	13.77447995	87.79030979	7.670420355	-0.881270917	-2.677062974	1.795792057	0.417865023	49.28258271
1	4	1	4	0	2	0	sock							210.1313415	50.49466742	159.6366741	177.3239757	93.77897406	0.349837116	-1.352427978	1.702265094	92.58180638	68.00629479	24.57551159	87.79030979	7.670420355	0.62467197	-2.579260859	3.203932829	0.329375959	47.78398435
1	4	1	4	1	3	0	red	0	0	0	0	0	0	204.6938296	49.2316133	155.4622163	177.3239757	93.77897406	0.291854909	-1.365896393	1.657751302	92.12788564	67.5699083	24.55797735	87.79030979	7.670420355	0.565493891	-2.636152981	3.201646872	0.339208078	49.80873312
1	4	1	4	0	4	0	star							254.2322517	59.82071958	194.4115321	177.3239757	93.77897406	0.820101486	-1.252980823	2.073082309	95.88003901	70.83088031	25.0491587	87.79030979	7.670420355	1.054665696	-2.211016958	3.265682654	0.383452609	48.9007131
1	4	1	5	0	1	1	yellow							108.8086828	100.4610863	8.34759649	177.3239757	93.77897406	-0.730603993	-0.819617512	0.089013519	81.18845178	79.80591565	1.382536132	87.79030979	7.670420355	-0.86069051	-1.040933061	0.180242551	0.404565068	48.9623146
1	4	1	5	1	2	1	tree	2	11.11	296	8.36	2	1	110.9586418	103.4815661	7.477075712	177.3239757	93.77897406	-0.707678182	-0.787409015	0.079730833	81.52653868	80.31880839	1.207730295	87.79030979	7.670420355	-0.816613799	-0.974066746	0.157452947	0.356969178	47.97395928
1	4	1	5	0	3	1	yellow							114.9554797	69.05442842	45.90105128	177.3239757	93.77897406	-0.665058416	-1.154518359	0.489459943	82.32702689	73.3159512	9.01107569	87.79030979	7.670420355	-0.71225339	-1.887035901	1.174782512	0.31466172	48.79355899
1	4	1	5	1	4	1	star	3	16.67	806	22.76	2	1	234.6752846	55.21518625	179.4600984	177.3239757	93.77897406	0.611558289	-1.302091334	1.913649623	94.49426519	69.44391854	25.05034664	87.79030979	7.670420355	0.874001044	-2.391836483	3.265837528	0.349036529	47.79218416
1	4	1	6	1	1	1	yellow	4	33.33	976	31.9	4	0	234.9032015	103.3603209	131.5428807	177.3239757	93.77897406	0.613988651	-0.788701897	1.402690549	94.51116954	80.29846854	14.212701	87.79030979	7.670420355	0.876204881	-0.976718472	1.852923352	0.343881726	51.05006524
1	4	1	6	0	2	1	tree							107.6889977	65.96719185	41.72180585	177.3239757	93.77897406	-0.74254361	-1.187438708	0.444895098	81.00872461	72.52412145	8.484603164	87.79030979	7.670420355	-0.884121712	-1.990267499	1.106145787	0.312971009	48.27261395
1	4	1	6	1	3	1	white	0	0	0	0	0	0	243.6412883	216.7876006	26.85368763	177.3239757	93.77897406	0.707166114	0.420815277	0.286350837	95.14337793	93.12165046	2.021727474	87.79030979	7.670420355	0.95862649	0.695051956	0.263574534	0.266604933	47.79022371
1	4	1	6	0	4	1	tree							125.1161731	112.3607346	12.75543853	177.3239757	93.77897406	-0.556711172	-0.692727146	0.136015974	83.60550014	81.74449641	1.861003731	87.79030979	7.670420355	-0.545577616	-0.788198443	0.242620827	0.289787971	45.76735834
1	4	1	7	0	1	1	brown							103.7121954	101.0110572	2.701138213	177.3239757	93.77897406	-0.784949729	-0.813752968	0.028803239	80.35730087	79.90046286	0.456838013	87.79030979	7.670420355	-0.969048445	-1.028606851	0.059558406	0.300941588	50.41253601
1	4	1	7	1	2	1	angel	2	13.33	426	10.64	2	1	108.8174639	66.65666443	42.16079951	177.3239757	93.77897406	-0.730510357	-1.180086606	0.44957625	81.18919561	72.70412974	8.485065872	87.79030979	7.670420355	-0.860593536	-1.966799647	1.106206111	0.466247531	50.65730378
1	4	1	7	0	3	1	brown							102.3140059	99.77866293	2.535342923	177.3239757	93.77897406	-0.799859143	-0.826894446	0.027035303	80.12232477	79.68792174	0.434403037	87.79030979	7.670420355	-0.999682503	-1.056316039	0.056633536	0.258555449	49.5909932
1	4	1	7	1	4	1	egg	1	6.67	174	4.35	1	0	208.239262	102.4490945	105.7901674	177.3239757	93.77897406	0.32966117	-0.798418643	1.128079813	92.42517952	80.14516108	12.28001844	87.79030979	7.670420355	0.604252377	-0.996705311	1.600957688	0.283193265	48.05652139
1	4	1	8	1	1	1	brown	2	10.53	416	10	2	0	222.6284921	48.02664099	174.6018511	177.3239757	93.77897406	0.48309887	-1.37874546	1.86184433	93.58193317	67.13916426	26.44276891	87.79030979	7.670420355	0.755059451	-2.692309492	3.447368943	0.506762577	52.18449538
1	4	1	8	0	2	1	angel							70.03397591	49.58460558	20.44937033	177.3239757	93.77897406	-1.144073081	-1.362132305	0.218059224	73.55980298	67.70350062	5.856302359	87.79030979	7.670420355	-1.855244713	-2.618736424	0.763491711	0.257340371	52.15192232
1	4	1	8	1	3	1	green	0	0	0	0	0	0	284.5948439	64.53491168	220.0599323	177.3239757	93.77897406	1.143869074	-1.202711643	2.346580717	97.83318857	72.14409512	25.68909345	87.79030979	7.670420355	1.309299662	-2.039811893	3.349111556	0.51072166	50.48858027
1	4	1	8	0	4	1	angel							80.36975812	79.85379032	0.515967804	177.3239757	93.77897406	-1.0338588	-1.039360756	0.005501956	75.94299033	75.83146779	0.111522534	87.79030979	7.670420355	-1.54454631	-1.55908561	0.0145393	0.344440189	48.13746999
1	4	1	9	0	1	2	blue							107.6673428	69.47396692	38.19337589	177.3239757	93.77897406	-0.742774525	-1.150044665	0.40727014	81.00524297	73.42086714	7.584375826	87.79030979	7.670420355	-0.884575617	-1.87335791	0.988782293	0.171443337	50.59373987
1	4	1	9	1	2	2	egg	2	16.67	696	23.82	1	0	224.0790842	70.56057487	153.5185093	177.3239757	93.77897406	0.498567072	-1.138457761	1.637024833	93.69437018	73.68901697	20.00535321	87.79030979	7.670420355	0.769717971	-1.838398962	2.608116933	0.36653403	49.24062175
1	4	1	9	0	3	2	blue							227.7943304	218.2862027	9.508127756	177.3239757	93.77897406	0.538184121	0.436795427	0.101388694	93.97905636	93.2401628	0.738893563	87.79030979	7.670420355	0.806832779	0.710502523	0.096330256	0.106413106	47.39046833
1	4	1	9	1	4	2	sock	0	0	0	0	0	0	274.0773966	107.002395	167.0750016	177.3239757	93.77897406	1.031717631	-0.74986511	1.78158274	97.18127451	80.89798585	16.28328866	87.79030979	7.670420355	1.224309006	-0.89855883	2.122867836	0.396093226	47.65867776
1	4	1	10	1	1	2	blue	0	0	0	0	0	0	220.4309638	68.21590202	152.2150618	177.3239757	93.77897406	0.45966581	-1.163459877	1.623125688	93.41059323	73.3395056	20.07108763	87.79030979	7.670420355	0.7327217	-1.883965092	2.616686792	0.414767996	51.34930292
1	4	1	10	0	2	2	egg							116.229704	74.32672805	41.90297596	177.3239757	93.77897406	-0.65147089	-1.098297872	0.446826982	82.49313765	74.58979069	7.903346955	87.79030979	7.670420355	-0.690597372	-1.720964235	1.030366863	0.275056671	50.97260279
1	4	1	10	1	3	2	brown	0	0	0	0	0	0	258.6798299	50.14061769	208.5392122	177.3239757	93.77897406	0.867527663	-1.356203342	2.223731005	96.18028508	67.77489437	28.40539071	87.79030979	7.670420355	1.093809062	-2.609428752	3.703237814	0.744698408	48.15320691
1	4	1	10	0	4	2	egg							116.2865128	54.86579513	61.42071772	177.3239757	93.77897406	-0.650865117	-1.305817021	0.654951905	82.33851537	69.3340213	13.00449408	87.79030979	7.670420355	-0.710755626	-2.406163891	1.695408265	0.209566987	47.26085224
1	4	1	11	0	1	2	green							55.18740445	51.48415381	3.703250639	177.3239757	93.77897406	-1.302387582	-1.341876717	0.039489136	69.43520556	68.23264539	1.202560164	87.79030979	7.670420355	-2.392972403	-2.549751316	0.156778914	0.285266842	51.6484812
1	4	1	11	1	2	2	bell	2	15.28	646	21.33	1	0	213.5595939	54.44977283	159.109821	177.3239757	93.77897406	0.386393843	-1.310253221	1.696647065	92.8619388	69.12228165	23.73965715	87.79030979	7.670420355	0.6611931	-2.433768591	3.09496169	0.330909536	49.86488755
1	4	1	11	0	3	2	green							68.92006835	50.03407777	18.88599058	177.3239757	93.77897406	-1.155951091	-1.357339416	0.201388326	73.28238303	67.83596804	5.446414992	87.79030979	7.670420355	-1.891412216	-2.60146652	0.710054304	0.228213473	51.7200521
1	4	1	11	1	4	2	egg	0	0	0	0	0	0	237.8528103	56.86389254	180.9889177	177.3239757	93.77897406	0.645441425	-1.284510567	1.929951992	94.72800592	69.95329146	24.77471446	87.79030979	7.670420355	0.904474046	-2.325429051	3.229903097	0.75690802	47.10900196
1	4	1	12	1	1	2	green	5	18.52	1354	22.11	5	2	239.7122504	103.9822079	135.7300425	177.3239757	93.77897406	0.665269324	-0.782070486	1.44733981	94.86188771	80.40159008	14.46029763	87.79030979	7.670420355	0.921928342	-0.963274419	1.885202761	0.508082123	50.49825359
1	4	1	12	0	2	2	bell							241.4767211	226.3859921	15.09072898	177.3239757	93.77897406	0.68408453	0.523166487	0.160918043	94.98888368	93.87169059	1.117193089	87.79030979	7.670420355	0.938484928	0.792835401	0.145649526	0.374082442	51.71468167
1	4	1	12	1	3	2	silver	3	11.11	690	11.27	3	2	107.4221071	63.6069261	43.81518101	177.3239757	93.77897406	-0.745389564	-1.212607098	0.467217534	80.96576538	72.12386656	8.841898828	87.79030979	7.670420355	-0.889722348	-2.04244911	1.152726762	0.591831923	49.15804093
1	4	1	12	0	4	2	bell							65.42585547	64.59588048	0.829974991	177.3239757	93.77897406	-1.193211179	-1.20206151	0.008850331	72.38146798	72.16044308	0.221024895	87.79030979	7.670420355	-2.008865368	-2.037680594	0.028815227	0.435498963	45.4814491
1	4	2	13	1	5	0	brother	2	15.38	690	23.03	1	0	226.8597107	102.8302504	124.0294604	177.3239757	93.77897406	0.528217924	-0.794354236	1.32257216	93.9076313	80.20967883	13.69795246	87.79030979	7.670420355	0.797521026	-0.988294071	1.785815097	0.381848171	49.46581393
1	4	2	13	0	6	0	doctor							242.1725944	224.0458298	18.12676459	177.3239757	93.77897406	0.691504885	0.498212468	0.193292417	95.03870161	93.69180076	1.346900846	87.79030979	7.670420355	0.944979738	0.769382993	0.175596745	0.513889128	48.27908012
1	4	2	13	0	5	0	brother							218.7130221	210.3366035	8.376418679	177.3239757	93.77897406	0.441346761	0.352025901	0.08932086	93.27475262	92.59870959	0.676043032	87.79030979	7.670420355	0.71501203	0.626875657	0.088136373	0.37956365	51.782072
1	4	2	13	1	6	0	doctor	2	28.57	640	26.29	1	0	265.808765	64.74291287	201.0658522	177.3239757	93.77897406	0.943546144	-1.20049365	2.144039793	96.65093842	72.19987725	24.45106117	87.79030979	7.670420355	1.155168585	-2.032539524	3.187708109	0.715331493	47.07925155
1	4	2	14	0	5	0	He							249.0097651	212.297473	36.71229207	177.3239757	93.77897406	0.764412174	0.37293538	0.391476794	95.5199626	92.75932192	2.760640679	87.79030979	7.670420355	1.007722192	0.64781484	0.359907352	0.105839864	50.67023592
1	4	2	14	1	6	0	study	1	9.09	68	2.13	1	0	266.4147142	74.86579206	191.5489222	177.3239757	93.77897406	0.950007605	-1.092549632	2.042557237	96.69035946	74.93193593	21.75842354	87.79030979	7.670420355	1.160307944	-1.676358434	2.836666378	0.441607708	47.65762442
1	4	2	14	1	5	0	He	1	7.69	164	4.79	1	0	248.3462646	212.3096086	36.03665595	177.3239757	93.77897406	0.757337022	0.373064786	0.384272235	95.47451084	92.76032671	2.714184128	87.79030979	7.670420355	1.001796602	0.647945835	0.353850768	0.11522417	49.76151179
1	4	2	14	0	6	0	study							221.4618717	220.4523408	1.009530814	177.3239757	93.77897406	0.470658764	0.459893761	0.010765003	93.49097431	93.41187631	0.079098005	87.79030979	7.670420355	0.743201058	0.732888976	0.010312082	0.271115693	46.72903207
1	4	2	15	0	5	0	three							245.2980479	215.9869678	29.31108014	177.3239757	93.77897406	0.724832756	0.412277832	0.312554924	95.26070331	93.05757034	2.203132974	87.79030979	7.670420355	0.973922311	0.68669777	0.287224542	0.124088396	50.1820388
1	4	2	15	1	6	0	shirts	0	0	0	0	0	0	235.085051	64.41188584	170.6731651	177.3239757	93.77897406	0.61592778	-1.204023514	1.819951294	94.52446789	72.13025816	22.39420973	87.79030979	7.670420355	0.877938599	-2.041615831	2.91955443	0.647032351	46.67317776
1	4	2	15	1	5	0	three	2	20	382	15.15	2	0	262.0447447	213.1698427	48.87490206	177.3239757	93.77897406	0.903408998	0.382237782	0.521171217	96.40400749	92.83031452	3.573692973	87.79030979	7.670420355	1.122975965	0.657070212	0.465905753	0.335507349	47.67311771
1	4	2	15	0	6	0	shirts							238.0854675	223.9602651	14.12520245	177.3239757	93.77897406	0.647922335	0.49730006	0.150622275	94.74402903	93.68519128	1.058837755	87.79030979	7.670420355	0.906562994	0.768521309	0.138041685	0.494658272	46.88275569
1	4	3	16	1	7	1	must	1	1.15	220	1.24	1	0	258.2025222	103.282811	154.9197113	177.3239757	93.77897406	0.862437954	-0.789528414	1.651966368	96.1483114	80.2855023	15.8628091	87.79030979	7.670420355	1.089640623	-0.978408893	2.068049516	0.486242016	49.64432815
1	4	3	16	1	8	1	may	0	0	0	0	0	0	237.0931335	101.7684522	135.3246813	177.3239757	93.77897406	0.637340709	-0.805676584	1.443017293	94.6717218	80.0297759	14.6419459	87.79030979	7.670420355	0.897136231	-1.011748187	1.908884419	0.381108607	51.74101946
1	4	3	17	1	9	1	allows	1	1.15	236	1.33	1	0	240.6409053	106.0281135	134.6127918	177.3239757	93.77897406	0.675171916	-0.760254235	1.435426151	94.92885707	80.7396538	14.18920328	87.79030979	7.670420355	0.930659201	-0.91920073	1.849859931	0.617658778	49.94097668
1	4	3	17	1	10	1	requires	2	2.3	400	2.25	1	0	218.9449488	64.45578481	154.489164	177.3239757	93.77897406	0.443819881	-1.203555403	1.647375284	93.74183311	72.36325939	21.37857373	87.79030979	7.670420355	0.775905758	-2.011239239	2.787144997	0.341683579	51.67743039
1	4	3	18	1	11	0	personal	2	2.5	548	3.14	1	0	249.90264	58.84773371	191.0549063	177.3239757	93.77897406	0.77393323	-1.263356132	2.037289363	95.58266798	70.54699049	25.0356775	87.79030979	7.670420355	1.015897152	-2.248027944	3.263925095	0.46553177	47.99689705
1	4	3	18	1	12	0	group	1	1.25	364	2.09	1	0	241.4278822	59.33616344	182.0917188	177.3239757	93.77897406	0.683563743	-1.258147825	1.941711568	94.98538189	70.69004101	24.29534087	87.79030979	7.670420355	0.938028396	-2.229378311	3.167406707	0.397818058	48.90849317
1	4	3	19	1	13	0	group	1	1.25	204	1.17	1	0	242.5740322	100.525297	142.0487351	177.3239757	93.77897406	0.695785566	-0.818932809	1.514718375	95.06737568	79.81697747	15.25039821	87.79030979	7.670420355	0.948718004	-1.039490921	1.988208925	0.315594162	48.9327783
1	4	3	19	1	14	0	personal	2	2.5	478	2.74	1	0	266.8548928	104.8386585	162.0162343	177.3239757	93.77897406	0.954701392	-0.772937835	1.727639228	96.71893984	80.54433462	16.17460522	87.79030979	7.670420355	1.164033995	-0.944664677	2.108698672	0.665751906	48.31267175
1	5	1	1	1	1	0	blue	1	10	186	9.37	1	0	219.8807021	209.7069097	10.17379241	197.6825795	61.74317504	0.359523504	0.19474752	0.164775984	93.36692617	92.54708559	0.819840584	90.68458427	5.574729865	0.481160875	0.334097143	0.147063732	0.218677616	54.56231882
1	5	1	1	0	2	0	drum							211.850934	194.1340626	17.71687145	197.6825795	61.74317504	0.2294724	-0.057472212	0.286944612	92.72299461	91.21091943	1.512075184	90.68458427	5.574729865	0.365651859	0.094414469	0.27123739	0.278810011	52.65754868
1	5	1	1	1	3	0	yellow	0	0	0	0	0	0	68.71433988	62.29366805	6.420671833	197.6825795	61.74317504	-2.088785352	-2.192775336	0.103989985	73.23047266	71.53216685	1.698305809	90.68458427	5.574729865	-3.13093406	-3.435577666	0.304643606	0.49652649	50.87029513
1	5	1	1	0	4	0	drum							67.15526686	64.74075086	2.414516001	197.6825795	61.74317504	-2.114036289	-2.153142085	0.039105796	72.83317308	72.19925947	0.63391362	90.68458427	5.574729865	-3.202202012	-3.315913999	0.113711987	0.360118114	46.74042997
1	5	1	2	0	1	0	blue							211.520373	201.0709209	10.44945211	197.6825795	61.74317504	0.224118593	0.054877991	0.169240602	92.69472634	91.81881834	0.875907992	90.68458427	5.574729865	0.360581072	0.203459916	0.157121156	0.155760749	53.97414183
1	5	1	2	1	2	0	drum	1	8.33	92	3.23	1	0	222.9579619	104.2724484	118.6855135	197.6825795	61.74317504	0.409363179	-1.512881885	1.922245065	93.60753491	80.45052907	13.15700584	90.68458427	5.574729865	0.524321485	-1.835793922	2.360115406	0.257186354	53.24145128
1	5	1	2	0	3	0	blue							204.1266742	182.8357852	21.29088903	197.6825795	61.74317504	0.104369345	-0.240460492	0.344829837	92.0798509	90.1729798	1.9068711	90.68458427	5.574729865	0.250284169	-0.091772065	0.342056233	0.195606522	49.58527485
1	5	1	2	1	4	0	ball	0	0	0	0	0	0	--undefined--	--undefined--	#VALUE!	197.6825795	61.74317504	#VALUE!	#VALUE!	#VALUE!	--undefined--	--undefined--	#VALUE!	90.68458427	5.574729865	#VALUE!	#VALUE!	#VALUE!	0.30065447	46.09554199
1	5	1	3	0	1	0	gold							199.9197517	192.557216	7.362535716	197.6825795	61.74317504	0.036233515	-0.083011012	0.119244527	91.71932646	91.06972054	0.649605915	90.68458427	5.574729865	0.185612974	0.069086086	0.116526888	0.202942752	53.45288762
1	5	1	3	1	2	0	sock	0	0	0	0	0	0	201.5662469	92.38052618	109.1857208	197.6825795	61.74317504	0.062900352	-1.705484909	1.768385261	91.86132317	78.3542023	13.50712087	90.68458427	5.574729865	0.21108447	-2.211834881	2.422919352	0.320198564	51.15298255
1	5	1	3	0	3	0	gold							65.646239	62.44009246	3.206146535	197.6825795	61.74317504	-2.138476688	-2.190403829	0.051927141	72.43968547	71.57289016	0.866795315	90.68458427	5.574729865	-3.272786169	-3.428272683	0.155486513	0.325109938	48.88616121
1	5	1	3	1	4	0	star	2	20	212	11.8	2	0	--undefined--	--undefined--	#VALUE!	197.6825795	61.74317504	#VALUE!	#VALUE!	#VALUE!	--undefined--	--undefined--	#VALUE!	90.68458427	5.574729865	#VALUE!	#VALUE!	#VALUE!	0.365296953	48.3968148
1	5	1	4	1	1	0	gold	1	10	190	8.59	1	0	208.3841942	99.46645276	108.9177415	197.6825795	61.74317504	0.173324659	-1.590720378	1.764045036	92.43723867	79.6336965	12.80354216	90.68458427	5.574729865	0.314392705	-1.982318074	2.296710779	0.242263855	53.41811429
1	5	1	4	0	2	0	sock							251.4046801	233.9610821	17.44359796	197.6825795	61.74317504	0.8700897	0.587571057	0.282518643	95.68641236	94.44149956	1.244912795	90.68458427	5.574729865	0.89723237	0.673918805	0.223313565	0.203721878	52.86780026
1	5	1	4	1	3	0	red	0	0	0	0	0	0	196.0354752	61.76355812	134.2719171	197.6825795	61.74317504	-0.026676702	-2.201361062	2.17468436	91.37958726	71.38420754	19.99537972	90.68458427	5.574729865	0.124670254	-3.462118739	3.586788993	0.258781845	48.85486863
1	5	1	4	0	4	0	sock							66.5228697	55.16973261	11.35313709	197.6825795	61.74317504	-2.12427867	-2.308155464	0.183876794	72.66934201	69.429661	3.239681011	90.68458427	5.574729865	-3.231590175	-3.812727035	0.58113686	0.644201614	46.1878548
1	5	1	5	0	1	1	yellow							207.558899	187.4401314	20.11876768	197.6825795	61.74317504	0.159958077	-0.165887939	0.325846016	92.36848293	90.60343326	1.765049668	90.68458427	5.574729865	0.302059239	-0.01455694	0.316616179	0.293474181	54.30813838
1	5	1	5	1	2	1	tree	2	14.29	198	5.97	2	1	229.9433649	67.51990266	162.4234623	197.6825795	61.74317504	0.522499619	-2.108130603	2.630630222	94.1416171	72.92689103	21.21472608	90.68458427	5.574729865	0.620125623	-3.185390803	3.805516426	0.554698453	52.13996401
1	5	1	5	0	3	1	yellow							91.46232188	87.17675486	4.285567024	197.6825795	61.74317504	-1.720356258	-1.789765825	0.069409567	78.18122373	77.35046119	0.830762543	90.68458427	5.574729865	-2.242863931	-2.391886854	0.149022923	0.190274469	48.69114762
1	5	1	5	1	4	1	star	2	14.29	658	19.84	2	0	88.34493161	86.77175023	1.57318138	197.6825795	61.74317504	-1.770845892	-1.796325329	0.025479438	77.58091012	77.26984229	0.311067833	90.68458427	5.574729865	-2.35054872	-2.406348344	0.055799624	0.528842425	47.77589043
1	5	1	6	1	1	1	yellow	1	6.67	106	3.18	1	0	266.2898079	193.5893737	72.70043425	197.6825795	61.74317504	1.111171047	-0.06629406	1.177465107	96.68224081	91.16229353	5.519947283	90.68458427	5.574729865	1.075864963	0.085691912	0.990173051	0.354285134	53.87300849
1	5	1	6	0	2	1	tree							248.1732428	237.1584821	11.01476072	197.6825795	61.74317504	0.817752947	0.639356538	0.178396409	95.4624339	94.67664444	0.785789459	90.68458427	5.574729865	0.857054915	0.716099303	0.140955612	0.120975412	51.30283395
1	5	1	6	1	3	1	white	0	0	0	0	0	0	199.3504977	68.15264362	131.1978541	197.6825795	61.74317504	0.027013807	-2.097882653	2.12489646	91.66995327	73.08837258	18.5815807	90.68458427	5.574729865	0.176756367	-3.156424099	3.333180466	0.30675908	50.73215266
1	5	1	6	0	4	1	tree							76.00210038	64.55437191	11.44772848	197.6825795	61.74317504	-1.970751893	-2.156160701	0.185408808	74.99574851	72.17098948	2.824759027	90.68458427	5.574729865	-2.814277309	-3.320985095	0.506707786	0.466619445	46.26192072
1	5	1	7	0	1	1	brown							215.2970059	199.7888674	15.5081385	197.6825795	61.74317504	0.285285401	0.034113696	0.251171704	93.00221335	91.7080252	1.294188152	90.68458427	5.574729865	0.415738365	0.183585744	0.232152621	0.182153758	52.94950568
1	5	1	7	1	2	1	angel	1	7.69	174	5.89	1	0	241.68303	197.7432347	43.93979529	197.6825795	61.74317504	0.712636668	0.00098238	0.711654288	95.01316617	91.52996101	3.483205153	90.68458427	5.574729865	0.77646487	0.151644431	0.624820439	0.531888973	53.3738763
1	5	1	7	0	3	1	brown							193.9593639	187.4224815	6.536882413	197.6825795	61.74317504	-0.060301654	-0.166173799	0.105872145	91.19532851	90.60181834	0.593510171	90.68458427	5.574729865	0.091617756	-0.014846626	0.106464382	0.155573746	51.20377399
1	5	1	7	1	4	1	egg	1	7.69	212	7.18	1	0	189.9633373	63.41234715	126.5509902	197.6825795	61.74317504	-0.125021788	-2.174657073	2.049635285	90.83492615	71.84049438	18.99443177	90.68458427	5.574729865	0.02696846	-3.3802696	3.40723806	0.875327371	46.07821363
1	5	1	8	1	1	1	brown	1	9.09	250	8.57	1	0	207.2265923	97.32785286	109.8987394	197.6825795	61.74317504	0.154575997	-1.625357403	1.7799334	92.34077966	79.25736988	13.08340978	90.68458427	5.574729865	0.297089802	-2.049823878	2.346913679	0.230526609	50.0926702
1	5	1	8	0	2	1	angel							247.799096	224.6559276	23.14316838	197.6825795	61.74317504	0.81169322	0.436863639	0.374829581	95.43632558	93.73886908	1.697456503	90.68458427	5.574729865	0.852371581	0.547880325	0.304491256	0.230526609	53.09857807
1	5	1	8	1	3	1	green	2	18.18	548	18.79	2	0	184.1878426	66.83239905	117.3554435	197.6825795	61.74317504	-0.218562406	-2.119265495	1.90070309	90.30034851	72.74975101	17.5505975	90.68458427	5.574729865	-0.068924552	-3.217166337	3.148241785	0.299923401	47.06620284
1	5	1	8	0	4	1	angel							--undefined--	--undefined--	#VALUE!	197.6825795	61.74317504	#VALUE!	#VALUE!	#VALUE!	--undefined--	--undefined--	#VALUE!	90.68458427	5.574729865	#VALUE!	#VALUE!	#VALUE!	0.665062443	45.14946941
1	5	1	9	0	1	2	blue							223.0971171	209.0565126	14.04060451	197.6825795	61.74317504	0.411616954	0.184213609	0.227403344	93.61902089	92.49299011	1.126030783	90.68458427	5.574729865	0.52638185	0.324393447	0.201988403	0.183142654	57.9703207
1	5	1	9	1	2	2	egg	0	0	0	0	0	0	236.3014674	208.6949603	27.60650715	197.6825795	61.74317504	0.625476223	0.178357864	0.447118359	94.61381769	92.46301618	2.150801513	90.68458427	5.574729865	0.704829384	0.319016697	0.385812687	0.313377431	50.9735476
1	5	1	9	0	3	2	blue							66.07001417	62.82923107	3.240783099	197.6825795	61.74317504	-2.131613174	-2.184101292	0.052488119	72.55146568	71.68229058	0.869175101	90.68458427	5.574729865	-3.252734936	-3.408648338	0.155913402	0.122095103	46.67338425
1	5	1	9	1	4	2	sock	3	8.82	634	9.38	3	0	173.6981929	55.50597601	118.1922169	197.6825795	61.74317504	-0.388454053	-2.302709625	1.914255573	89.28526722	69.53485442	19.7504128	90.68458427	5.574729865	-0.251010737	-3.793857346	3.542846609	0.700011924	45.55474413
1	5	1	10	1	1	2	blue	2	12.5	400	12.1	2	0	220.4818417	67.79985367	152.681988	197.6825795	61.74317504	0.369259634	-2.103596482	2.472856116	93.81056684	72.99852305	20.81204379	90.68458427	5.574729865	0.560741533	-3.172541387	3.73328292	0.240271671	55.5450649
1	5	1	10	0	2	2	egg							70.77606877	68.56882066	2.207248108	197.6825795	61.74317504	-2.055393339	-2.091142199	0.03574886	73.7422767	73.19375292	0.54852378	90.68458427	5.574729865	-3.039126196	-3.13752088	0.098394683	0.133484262	53.14535044
1	5	1	10	1	3	2	brown	0	0	0	0	0	0	193.9402209	61.86710803	132.0731128	197.6825795	61.74317504	-0.060611696	-2.199683955	2.139072258	91.19356843	71.40369529	19.78987314	90.68458427	5.574729865	0.091302031	-3.458623009	3.54992504	0.194505638	49.37149551
1	5	1	10	0	4	2	egg							92.65735713	58.97193603	33.6854211	197.6825795	61.74317504	-1.701001322	-2.246574514	0.545573192	78.57705934	70.58349396	7.993565384	90.68458427	5.574729865	-2.171858587	-3.605751453	1.433892865	0.137298098	48.16866729
1	5	1	11	0	1	2	green							105.749679	101.7662359	3.983443149	197.6825795	61.74317504	-1.488956478	-1.553472809	0.064516331	80.69411368	80.02938823	0.664725454	90.68458427	5.574729865	-1.792099498	-1.91133854	0.119239042	0.221877906	54.04558604
1	5	1	11	1	2	2	bell	0	0	0	0	0	0	219.9433517	105.6394086	114.3039431	197.6825795	61.74317504	0.360538185	-1.490742431	1.851280616	93.37186577	80.67605184	12.69581393	90.68458427	5.574729865	0.482046945	-1.795339447	2.277386391	0.408537096	54.15106752
1	5	1	11	0	3	2	green							65.7045567	63.08018797	2.624368729	197.6825795	61.74317504	-2.137532168	-2.180036764	0.042504596	72.45508031	71.7491372	0.70594311	90.68458427	5.574729865	-3.270024629	-3.396657332	0.126632703	0.123265503	49.26314878
1	5	1	11	1	4	2	egg	3	27.27	320	16.24	1	0	69.44927033	50.90827859	18.54099175	197.6825795	61.74317504	-2.076882328	-2.377174494	0.300292166	73.48022391	68.12477706	5.355446848	90.68458427	5.574729865	-3.086133459	-4.046798277	0.960664818	0.193702933	49.06661083
1	5	1	12	1	1	2	green	4	23.53	662	17.92	4	1	225.5844059	199.0464301	26.53797573	197.6825795	61.74317504	0.451901387	0.022089091	0.429812296	93.81028237	91.64359333	2.166689041	90.68458427	5.574729865	0.560690504	0.172027898	0.388662607	0.307891856	52.88602521
1	5	1	12	0	2	2	bell							216.8074991	204.7964059	12.01109324	197.6825795	61.74317504	0.309749533	0.115216401	0.194533132	93.12325018	92.13657069	0.986679488	90.68458427	5.574729865	0.437450059	0.260458615	0.176991444	0.278944758	54.77800813
1	5	1	12	1	3	2	silver	2	11.76	740	20.03	2	0	198.3106681	63.91995105	134.390717	197.6825795	61.74317504	0.0101726	-2.166435858	2.176608459	91.57935409	71.97836009	19.60099401	90.68458427	5.574729865	0.160504606	-3.355539126	3.516043732	0.626309929	49.2949012
1	5	1	12	0	4	2	bell							--undefined--	--undefined--	#VALUE!	197.6825795	61.74317504	#VALUE!	#VALUE!	#VALUE!	--undefined--	--undefined--	#VALUE!	90.68458427	5.574729865	#VALUE!	#VALUE!	#VALUE!	0.428943355	44.70239318
1	5	2	13	1	5	0	brother	3	25	818	29.49	3	0	247.3823921	197.5416069	49.8407852	197.6825795	61.74317504	0.804944232	-0.002283209	0.807227441	95.40725032	91.51215829	3.895092037	90.68458427	5.574729865	0.847156035	0.148450963	0.698705072	0.302854829	53.54839277
1	5	2	13	0	6	0	doctor							64.61750175	62.86057818	1.756923578	197.6825795	61.74317504	-2.155138242	-2.183593591	0.028455349	72.16623683	71.68900364	0.477233188	90.68458427	5.574729865	-3.32183763	-3.407444143	0.085606514	0.873810614	45.41331424
1	5	2	13	0	5	0	brother							216.2307519	192.868214	23.36253793	197.6825795	61.74317504	0.300408465	-0.077974051	0.378382516	93.07724198	91.0976638	1.979578182	90.68458427	5.574729865	0.429197067	0.074098573	0.355098494	0.167804633	54.29384408
1	5	2	13	1	6	0	doctor	1	10	240	11.75	1	0	196.9297813	63.83179654	133.0979848	197.6825795	61.74317504	-0.012192411	-2.16786362	2.155671209	91.45844992	71.95444017	19.50400975	90.68458427	5.574729865	0.138816708	-3.359829903	3.498646611	0.750994507	46.01926817
1	5	2	14	0	5	0	He							260.0435733	236.4726519	23.5709214	197.6825795	61.74317504	1.010006269	0.628248748	0.38175752	96.27131488	94.62633331	1.644981572	90.68458427	5.574729865	1.002152704	0.707074447	0.295078257	0.04641067	50.92004281
1	5	2	14	1	6	0	study	0	0	0	0	0	0	195.9412067	80.39025109	115.5509556	197.6825795	61.74317504	-0.028203486	-1.899680868	1.871477383	91.37131951	75.94738382	15.42393569	90.68458427	5.574729865	0.123187178	-2.64357212	2.766759298	0.47538733	47.10199412
1	5	2	14	1	5	0	He	1	12.5	86	4.24	1	0	273.8618697	220.0932969	53.76857282	197.6825795	61.74317504	1.233809084	0.362966715	0.870842369	97.16765521	93.38346118	3.784194022	90.68458427	5.574729865	1.16293903	0.48412694	0.67881209	0.125245687	55.49665073
1	5	2	14	0	6	0	study							66.05080431	64.11293593	1.937868378	197.6825795	61.74317504	-2.131924299	-2.163310252	0.031385953	72.54607303	72.03052285	0.515550181	90.68458427	5.574729865	-3.253702274	-3.346182124	0.09247985	0.387387822	47.45929448
1	5	2	15	0	5	0	three							220.1935629	204.9805126	15.21305031	197.6825795	61.74317504	0.364590636	0.118198216	0.24639242	93.39154181	92.1521154	1.23942641	90.68458427	5.574729865	0.48557645	0.263247039	0.222329411	0.241268268	49.30715702
1	5	2	15	1	6	0	shirts	2	22.22	486	27.46	2	0	--undefined--	--undefined--	#VALUE!	197.6825795	61.74317504	#VALUE!	#VALUE!	#VALUE!	--undefined--	--undefined--	#VALUE!	90.68458427	5.574729865	#VALUE!	#VALUE!	#VALUE!	0.465545812	45.99891648
1	5	2	15	1	5	0	three	1	12.5	258	16.04	1	0	237.4963598	72.8002478	164.696112	197.6825795	61.74317504	0.644828846	-2.022609488	2.667438335	94.70113908	74.23045747	20.47068161	90.68458427	5.574729865	0.720493173	-2.951555896	3.672049069	0.309717768	50.7276422
1	5	2	15	0	6	0	shirts							114.4805577	109.5781159	4.902441829	197.6825795	61.74317504	-1.347550101	-1.426950647	0.079400546	82.06750554	81.30979071	0.757714832	90.68458427	5.574729865	-1.545739245	-1.681658805	0.13591956	0.448556768	46.87277525
1	5	3	16	1	7	1	must	0	0	0	0	0	0	192.7023283	61.96995071	130.7323776	197.6825795	61.74317504	-0.080660756	-2.198018302	2.117357546	91.08307562	71.44196482	19.6411108	90.68458427	5.574729865	0.071481733	-3.451758187	3.523239919	0.515450844	48.63080493
1	5	3	16	1	8	1	may	6	6.52	1250	7.57	4	1	182.0286813	65.30943509	116.7192462	197.6825795	61.74317504	-0.253532446	-2.143931605	1.89039916	90.09626371	72.35037951	17.7458842	90.68458427	5.574729865	-0.105533465	-3.288805952	3.183272487	0.347423649	47.27416858
1	5	3	17	1	9	1	allows	0	0	0	0	0	0	199.475525	87.39463395	112.0808911	197.6825795	61.74317504	0.029038765	-1.786237029	1.815275793	91.6808152	77.39367391	14.28714128	90.68458427	5.574729865	0.17870479	-2.384135318	2.562840108	0.440069956	51.02835207
1	5	3	17	1	10	1	requires	3	3.26	554	3.35	3	0	192.0752343	63.69712661	128.3781077	197.6825795	61.74317504	-0.090817247	-2.17004475	2.079227503	91.02633244	71.91787666	19.10845577	90.68458427	5.574729865	0.06130309	-3.366388698	3.427691788	0.851637428	48.29563047
1	5	3	18	1	11	0	personal	3	3.41	626	2.92	2	0	226.0442599	87.75473351	138.2895264	197.6825795	61.74317504	0.459349238	-1.780404812	2.239754051	93.84553767	77.46487227	16.3806654	90.68458427	5.574729865	0.567014631	-2.371363693	2.938378324	0.642965012	50.3761863
1	5	3	18	1	12	0	group	2	2.27	268	1.25	1	0	200.7521911	177.11874	23.63345114	197.6825795	61.74317504	0.049715805	-0.333054454	0.382770259	91.79126309	89.62287665	2.168386443	90.68458427	5.574729865	0.198517031	-0.190450057	0.388967088	0.357202785	48.81399104
1	5	3	19	1	13	0	group	1	1.14	280	1.3	1	0	107.3925884	62.35205645	45.04053194	197.6825795	61.74317504	-1.462347717	-2.191829671	0.729481954	80.96100744	71.54838285	9.41262459	90.68458427	5.574729865	-1.744223858	-3.432668826	1.688444968	0.471878197	50.80168
1	5	3	19	1	14	0	personal	3	3.41	1002	4.67	2	0	209.372526	62.12695892	147.245567	197.6825795	61.74317504	0.189331801	-2.195475378	2.384807179	92.51913999	71.48578691	21.03335308	90.68458427	5.574729865	0.329084236	-3.443897341	3.772981577	0.540907074	48.23869826
2	6	1	1	1	1	0	blue	1	7.14	224	5.38	1	0	163.6550513	131.3106282	32.34442308	147.9611533	52.81610133	0.297142304	-0.315254717	0.612397021	88.25457595	84.4420797	3.812496249	85.93006287	3.889537421	0.597632271	-0.382560446	0.980192716	0.257665801	55.75329719
2	6	1	1	0	2	0	drum							176.0697818	99.39697384	76.67280797	147.9611533	52.81610133	0.532198095	-0.919495726	1.451693821	89.52004219	79.62169144	9.898350752	85.93006287	3.889537421	0.922983618	-1.62188218	2.544865797	0.272602948	50.1794731
2	6	1	1	1	3	0	yellow	1	7.14	308	7.4	1	0	161.4518935	130.9415907	30.5103028	147.9611533	52.81610133	0.255428551	-0.322241933	0.577670484	88.02000392	84.39330433	3.62669959	85.93006287	3.889537421	0.537323806	-0.395100593	0.932424399	0.365960123	56.80548055
2	6	1	1	0	4	0	drum							169.9039699	73.46537301	96.43859685	147.9611533	52.81610133	0.415456955	-1.410474806	1.825931761	88.90290902	74.50761245	14.39529657	85.93006287	3.889537421	0.764318691	-2.936711795	3.701030486	0.242728653	51.09415343
2	6	1	2	0	1	0	blue							154.5714884	134.9386697	19.63281862	147.9611533	52.81610133	0.125157574	-0.246562757	0.371720332	87.26556933	84.9139366	2.351632727	85.93006287	3.889537421	0.343358687	-0.261246045	0.604604732	0.304682036	56.39840787
2	6	1	2	1	2	0	drum	2	12.5	440	9.22	2	1	175.5270863	149.8361149	25.69097142	147.9611533	52.81610133	0.521922905	0.035499811	0.486423094	89.46705514	86.72689904	2.740156097	85.93006287	3.889537421	0.909360648	0.204866565	0.704494083	0.25840122	53.14696876
2	6	1	2	0	3	0	blue							146.7090153	126.1541183	20.55489699	147.9611533	52.81610133	-0.023707505	-0.412886117	0.389178612	86.36200848	83.74870893	2.613299548	85.93006287	3.889537421	0.111053209	-0.560826058	0.671879267	0.30853877	52.51886561
2	6	1	2	1	4	0	ball	2	12.5	1196	25.07	1	0	157.6680282	147.0385822	10.62944598	147.9611533	52.81610133	0.183786283	-0.01746761	0.201253893	87.60895597	86.40061141	1.208344562	85.93006287	3.889537421	0.431643385	0.120978021	0.310665364	0.219833874	51.73001375
2	6	1	3	0	1	0	gold							161.9731377	152.6984073	9.274730362	147.9611533	52.81610133	0.265297591	0.089693368	0.175604222	88.07533196	87.05450425	1.02082771	85.93006287	3.889537421	0.551548644	0.289093858	0.262454786	0.320969972	56.39738739
2	6	1	3	1	2	0	sock	4	25	954	22.78	4	1	151.9996261	116.895691	35.10393514	147.9611533	52.81610133	0.07646291	-0.588181662	0.664644573	86.97508758	82.42893528	4.546152299	85.93006287	3.889537421	0.268675834	-0.90013984	1.168815674	0.156663915	53.18852154
2	6	1	3	0	3	0	gold							152.4620482	140.5907981	11.87125012	147.9611533	52.81610133	0.085218235	-0.139547505	0.22476574	87.02767623	85.62453439	1.403141841	85.93006287	3.889537421	0.282196375	-0.078551367	0.360747741	0.351538541	51.26310702
2	6	1	3	1	4	0	star	2	12.5	494	11.8	1	0	119.7679089	113.0876985	6.680210388	147.9611533	52.81610133	-0.53380018	-0.660280746	0.126480566	82.84917105	81.85557832	0.993592733	85.93006287	3.889537421	-0.792097231	-1.047549904	0.255452673	0.183411413	44.00391255
2	6	1	4	1	1	0	gold	3	18.75	934	21.16	3	1	176.407922	151.7123076	24.69561436	147.9611533	52.81610133	0.538600313	0.071022931	0.467577382	89.55409466	86.94132057	2.612774092	85.93006287	3.889537421	0.931738507	0.259994336	0.671744171	0.190704205	62.35644423
2	6	1	4	0	2	0	sock							150.0089551	120.8764319	29.1325232	147.9611533	52.81610133	0.038772302	-0.512811826	0.551584128	86.74685781	83.00867003	3.738187778	85.93006287	3.889537421	0.209997964	-0.751090046	0.96108801	0.230619039	47.99591767
2	6	1	4	1	3	0	red	1	6.25	374	8.47	1	0	163.7568312	137.6395614	26.11726972	147.9611533	52.81610133	0.299069366	-0.1954251	0.494494466	88.26505487	85.25677975	3.008275118	85.93006287	3.889537421	0.600326401	-0.173101078	0.773427479	0.32375365	53.5085042
2	6	1	4	0	4	0	sock							120.6667342	118.5055164	2.161217829	147.9611533	52.81610133	-0.516782163	-0.55770184	0.040919677	82.97861033	82.66572489	0.312885439	85.93006287	3.889537421	-0.758818394	-0.839261235	0.080442841	0.217314094	44.01098601
2	6	1	5	0	1	1	yellow							172.1986261	145.7197534	26.47887267	147.9611533	52.81610133	0.458903104	-0.042437814	0.501340918	89.13537809	86.24368977	2.891688318	85.93006287	3.889537421	0.824086485	0.08063347	0.743453014	0.334632264	58.13978055
2	6	1	5	1	2	1	tree	2	11.76	730	14.2	2	1	153.6835046	148.3701153	5.313389275	147.9611533	52.81610133	0.108344826	0.007743132	0.100601695	87.16582216	86.55668068	0.609141478	85.93006287	3.889537421	0.317713691	0.161103428	0.156610263	0.215891783	45.27790987
2	6	1	5	0	3	1	yellow							153.1858071	133.5879209	19.59788627	147.9611533	52.81610133	0.098921611	-0.272137322	0.371058933	87.10966598	84.73974603	2.36991995	85.93006287	3.889537421	0.303275938	-0.306030438	0.609306376	0.323837674	55.88565913
2	6	1	5	1	4	1	star	1	5.88	626	12.18	1	0	145.5132879	145.4856639	0.027624033	147.9611533	52.81610133	-0.046346953	-0.046869975	0.000523022	86.2200848	86.21679825	0.003286554	85.93006287	3.889537421	0.074564633	0.073719661	0.000844972	0.25907014	42.64113183
2	6	1	6	1	1	1	yellow	2	11.11	472	9.2	2	1	161.0528499	137.5560944	23.49675557	147.9611533	52.81610133	0.247873211	-0.197005432	0.444878643	87.97762625	85.24651462	2.731111635	85.93006287	3.889537421	0.526428508	-0.175740243	0.70216875	0.327116594	56.6364266
2	6	1	6	0	2	1	tree							159.5287073	145.9912228	13.53748446	147.9611533	52.81610133	0.219015674	-0.037297915	0.256313589	87.81206701	86.27722351	1.534843498	85.93006287	3.889537421	0.48386323	0.089254994	0.394608236	0.154158395	52.66184317
2	6	1	6	1	3	1	white	2	11.11	502	9.79	2	0	154.8030668	132.5763818	22.22668505	147.9611533	52.81610133	0.129542192	-0.291289419	0.420831611	87.2915365	84.60526792	2.686268577	85.93006287	3.889537421	0.350034846	-0.340604757	0.690639603	0.26319726	52.45131161
2	6	1	6	0	4	1	tree							143.5632039	119.0642873	24.49891653	147.9611533	52.81610133	-0.083269103	-0.547122284	0.463853181	85.98650657	82.74719245	3.239314127	85.93006287	3.889537421	0.014511674	-0.818315927	0.832827601	0.206797847	46.47037943
2	6	1	7	0	1	1	brown							145.0454678	124.1855634	20.85990442	147.9611533	52.81610133	-0.055204481	-0.450157987	0.394953506	86.16433688	83.47624428	2.688092605	85.93006287	3.889537421	0.060231844	-0.630876715	0.691108558	0.475911261	46.81030005
2	6	1	7	1	2	1	angel	5	27.78	1112	22.37	3	1	160.690947	148.6232611	12.06768588	147.9611533	52.81610133	0.241021079	0.012536098	0.228484981	87.93773811	86.58619344	1.351544666	85.93006287	3.889537421	0.516173268	0.168691158	0.34748211	0.492043846	42.23129498
2	6	1	7	0	3	1	brown							149.0667079	122.2759709	26.790737	147.9611533	52.81610133	0.020932151	-0.486313486	0.507245638	86.66117534	83.20796574	3.453209604	85.93006287	3.889537421	0.187969003	-0.699851122	0.887820125	0.395248335	49.07527615
2	6	1	7	1	4	1	egg	1	5.56	198	3.98	1	0	139.8257442	118.6338227	21.19192153	147.9611533	52.81610133	-0.154032745	-0.555272537	0.401239792	85.52984982	82.68445888	2.845390946	85.93006287	3.889537421	-0.102894768	-0.834444727	0.731549959	0.298452825	44.05134325
2	6	1	8	1	1	1	brown	3	20	1126	24.64	3	1	170.9587136	131.5351467	39.42356697	147.9611533	52.81610133	0.435427071	-0.311003769	0.74643084	89.01004977	84.47168776	4.53836201	85.93006287	3.889537421	0.791864576	-0.374948214	1.16681279	0.407843069	54.52391356
2	6	1	8	0	2	1	angel							169.9548106	75.93203266	94.02277795	147.9611533	52.81610133	0.416419553	-1.363772009	1.780191562	88.91723485	74.95964068	13.95759416	85.93006287	3.889537421	0.768001862	-2.820495345	3.588497207	0.366052099	51.55585903
2	6	1	8	1	3	1	green	1	6.67	188	4.11	1	0	155.1607083	126.7380069	28.42270143	147.9611533	52.81610133	0.13631364	-0.401830992	0.538144632	87.33143534	83.82847658	3.502958768	85.93006287	3.889537421	0.360292837	-0.540317797	0.900610633	0.364659685	53.01012784
2	6	1	8	0	4	1	angel							153.2457453	93.90708426	59.338661	147.9611533	52.81610133	0.100056458	-1.02343921	1.123495668	87.08862628	78.90784272	8.180783558	85.93006287	3.889537421	0.297866632	-1.805412673	2.103279304	0.30708184	49.72997529
2	6	1	9	0	1	2	blue							157.8985899	125.8711118	32.02747814	147.9611533	52.81610133	0.18815165	-0.418244454	0.606396104	87.6343034	83.70959587	3.924707538	85.93006287	3.889537421	0.438160209	-0.570882025	1.009042234	0.26731684	54.78478475
2	6	1	9	1	2	2	egg	2	10	276	5.23	2	1	153.3125558	112.1504958	41.16206008	147.9611533	52.81610133	0.101321423	-0.678025386	0.779346808	87.12398809	81.71228349	5.4117046	85.93006287	3.889537421	0.306958152	-1.084391002	1.391349154	0.197305287	51.22555043
2	6	1	9	0	3	2	blue							155.1381781	126.3241669	28.81401119	147.9611533	52.81610133	0.135887062	-0.409666481	0.545553543	87.3289261	83.77184227	3.557083838	85.93006287	3.889537421	0.359647711	-0.554878477	0.914526188	0.330963706	53.34492142
2	6	1	9	1	4	2	sock	1	5	262	4.96	1	0	162.8798497	156.2139502	6.665899524	147.9611533	52.81610133	0.282464931	0.156255322	0.126209609	88.1719719	87.44855381	0.72341809	85.93006287	3.889537421	0.576394771	0.390403993	0.185990778	0.330963706	45.90329425
2	6	1	10	1	1	2	blue	3	13.64	902	15.76	3	1	166.0916958	107.6979755	58.39372036	147.9611533	52.81610133	0.343276805	-0.762327714	1.105604519	88.6374426	81.18025299	7.457189603	85.93006287	3.889537421	0.696067279	-1.221176034	1.917243313	0.248143109	55.1684035
2	6	1	10	0	2	2	egg							169.2622908	112.3476952	56.91459553	147.9611533	52.81610133	0.403307647	-0.674291687	1.077599334	88.83761969	81.74196627	7.095653423	85.93006287	3.889537421	0.747532805	-1.07675956	1.824292365	0.214810452	52.39139527
2	6	1	10	1	3	2	brown	2	9.09	482	8.42	2	0	158.4892072	125.2899788	33.19922846	147.9611533	52.81610133	0.199334174	-0.429247406	0.62858158	87.69889651	83.62952848	4.069368032	85.93006287	3.889537421	0.454767097	-0.59146735	1.046234446	0.259253994	54.29264422
2	6	1	10	0	4	2	egg							157.169663	144.8036101	12.36605286	147.9611533	52.81610133	0.174350425	-0.059783723	0.234134148	87.5514863	86.13544512	1.416041178	85.93006287	3.889537421	0.416867934	0.052803773	0.364064162	0.166663282	52.88294261
2	6	1	11	0	1	2	green							139.730632	115.4369798	24.29365213	147.9611533	52.81610133	-0.155833563	-0.615800346	0.459966783	85.51806205	82.2115398	3.306522248	85.93006287	3.889537421	-0.105925403	-0.956032214	0.85010681	0.297866817	52.39727835
2	6	1	11	1	2	2	bell	3	15	928	19.49	3	1	152.0271142	120.0903906	31.93672364	147.9611533	52.81610133	0.07698336	-0.527694434	0.604677793	86.97900817	82.89572284	4.083285331	85.93006287	3.889537421	0.269683818	-0.780128766	1.049812584	0.246670958	49.69058641
2	6	1	11	0	3	2	green							123.063951	114.8401639	8.223787164	147.9611533	52.81610133	-0.471394171	-0.627100232	0.155706061	83.31946676	82.12182546	1.197641303	85.93006287	3.889537421	-0.671184212	-0.979097769	0.307913556	0.246670958	48.65491448
2	6	1	11	1	4	2	egg	1	5	150	3.15	1	0	131.0759275	114.3995297	16.67639785	147.9611533	52.81610133	-0.319698451	-0.635443032	0.315744581	84.41110733	82.05524772	2.355859607	85.93006287	3.889537421	-0.390523442	-0.996214904	0.605691463	0.218745944	44.37374974
2	6	1	12	1	1	2	green	2	13.33	412	8.87	2	0	154.3046885	129.7871258	24.51756272	147.9611533	52.81610133	0.120106086	-0.344100133	0.464206219	87.23563211	84.24004783	2.995584278	85.93006287	3.889537421	0.335661828	-0.434502836	0.770164664	0.311444254	53.2258381
2	6	1	12	0	2	2	bell							167.6241244	136.5997892	31.02433526	147.9611533	52.81610133	0.372291226	-0.215111752	0.587402978	88.67174012	85.12573736	3.546002759	85.93006287	3.889537421	0.704885171	-0.206792074	0.911677245	0.208850853	54.09567791
2	6	1	12	1	3	2	silver	1	6.67	744	16.01	1	0	150.1721162	135.0226833	15.14943284	147.9611533	52.81610133	0.041861532	-0.244972076	0.286833608	86.76572543	84.92611389	1.839611544	85.93006287	3.889537421	0.214848829	-0.258115264	0.472964093	0.355412854	51.09784882
2	6	1	12	0	4	2	bell							158.9994232	129.799053	29.20037026	147.9611533	52.81610133	0.20899441	-0.343874308	0.552868717	87.75453266	84.24163256	3.512900098	85.93006287	3.889537421	0.46907115	-0.434095402	0.903166552	0.179538452	52.13424207
2	6	2	13	1	5	0	brother	6	33.33	2530	48.77	5	0	170.1517185	121.3919054	48.75981309	147.9611533	52.81610133	0.420147733	-0.503052047	0.923199779	88.9281384	83.08244848	5.845689918	85.93006287	3.889537421	0.770805164	-0.732121608	1.502926772	0.464575827	54.13143762
2	6	2	13	0	6	0	doctor							157.9317688	70.0093231	87.92244569	147.9611533	52.81610133	0.188779847	-1.475910342	1.664690189	87.63789115	73.55370183	14.08418932	85.93006287	3.889537421	0.43908262	-3.181962198	3.621044818	0.436248033	40.27910157
2	6	2	13	0	5	0	brother							175.8813842	129.4963678	46.38501639	147.9611533	52.81610133	0.528631047	-0.349605234	0.878236281	89.50150799	84.20099662	5.30051137	85.93006287	3.889537421	0.918218475	-0.444542901	1.362761377	0.427454738	55.41273882
2	6	2	13	1	6	0	doctor	5	26.32	1228	26.92	4	1	152.9669054	98.6500775	54.31682791	147.9611533	52.81610133	0.094777009	-0.933637178	1.028414187	87.08490927	79.49822274	7.586686528	85.93006287	3.889537421	0.296910988	-1.65362598	1.950536969	0.531080129	41.46177094
2	6	2	14	0	5	0	He							154.8197237	149.0513476	5.768376149	147.9611533	52.81610133	0.129857567	0.020641325	0.109216242	87.29331812	86.63599903	0.657319089	85.93006287	3.889537421	0.3504929	0.181496174	0.168996726	0.151696447	53.44390578
2	6	2	14	1	6	0	study	5	26.32	1268	25.01	3	0	140.5976996	118.603986	21.99371357	147.9611533	52.81610133	-0.139416835	-0.555837454	0.416420619	85.62515016	82.68015503	2.944995123	85.93006287	3.889537421	-0.078393052	-0.835551246	0.757158194	0.334624515	42.18440734
2	6	2	14	1	5	0	He	5	27.78	1380	32.42	3	0	145.8046608	136.6883907	9.116270163	147.9611533	52.81610133	-0.040830209	-0.213434205	0.172603995	86.25471633	85.13698585	1.117730485	85.93006287	3.889537421	0.083468399	-0.203900087	0.287368486	0.220203956	50.42548087
2	6	2	14	0	6	0	study							121.3076967	111.4260957	9.881601009	147.9611533	52.81610133	-0.504646422	-0.691740902	0.18709448	83.07074656	81.59937308	1.471373481	85.93006287	3.889537421	-0.735130171	-1.113420266	0.378290095	0.241792579	44.51739245
2	6	2	15	0	5	0	three							201.485875	128.180055	73.30581998	147.9611533	52.81610133	1.013416749	-0.374527801	1.38794455	91.85475194	84.02436634	7.830385597	85.93006287	3.889537421	1.523237452	-0.489954543	2.013191995	0.427454396	50.3615
2	6	2	15	1	6	0	shirt	1	9.09	768	18.55	1	0	177.3759424	158.5678453	18.80809709	147.9611533	52.81610133	0.556928444	0.200823078	0.356105366	89.64799847	87.70747725	1.940521214	85.93006287	3.889537421	0.955881175	0.456973205	0.49890797	0.398957436	41.41753298
2	6	2	15	1	5	0	three	4	28.57	1134	24.52	4	0	170.0999761	137.1556854	32.94429074	147.9611533	52.81610133	0.419168062	-0.204586624	0.623754686	88.92300034	85.19605304	3.726947297	85.93006287	3.889537421	0.769484169	-0.188713914	0.958198083	0.427168504	50.44359522
2	6	2	15	0	6	0	shirt							164.8964714	107.3429014	57.55356992	147.9611533	52.81610133	0.32064688	-0.769050552	1.089697432	88.3850006	81.09652138	7.288479216	85.93006287	3.889537421	0.631164446	-1.242703429	1.873867875	0.398959263	43.95406665
2	6	3	16	1	7	1	must	2	1.17	538	1.14	1	0	153.7719618	122.0284413	31.74352054	147.9611533	52.81610133	0.110019641	-0.491000118	0.601019759	87.17578394	83.17288073	4.002903204	85.93006287	3.889537421	0.320274864	-0.708871478	1.029146342	0.282563279	50.68770932
2	6	3	16	1	8	1	may	3	1.75	804	1.71	3	0	132.3342992	121.303194	11.03110518	147.9611533	52.81610133	-0.295872919	-0.504731675	0.208858756	84.57651872	83.06965445	1.506864267	85.93006287	3.889537421	-0.347996176	-0.735410953	0.387414776	0.215286308	50.16329983
2	6	3	17	1	9	1	allows	3	1.75	732	1.55	2	0	144.7865117	121.823337	22.96317477	147.9611533	52.81610133	-0.060107458	-0.494883485	0.434776027	86.13396183	83.14378621	2.990175621	85.93006287	3.889537421	0.052422419	-0.716351678	0.768774097	0.296018673	54.68950657
2	6	3	17	1	10	1	requires	1	0.58	458	0.97	1	0	145.6214255	117.2258397	28.39558577	147.9611533	52.81610133	-0.044299517	-0.581930752	0.537631235	86.23312842	82.47777031	3.755358114	85.93006287	3.889537421	0.077918147	-0.887584354	0.965502502	0.632403529	47.9903473
2	6	3	18	1	11	0	personal	3	2.38	582	1.81	2	0	154.959098	136.9680832	17.99101482	147.9611533	52.81610133	0.132496427	-0.208138613	0.34063504	87.30892381	85.17415466	2.134769153	85.93006287	3.889537421	0.354505123	-0.194343987	0.54884911	0.450776459	50.05166767
2	6	3	18	1	12	0	group	1	0.79	262	0.81	1	0	162.8917791	133.7403592	29.15141991	147.9611533	52.81610133	0.282690798	-0.269251113	0.551941911	88.17374598	84.75971038	3.414035602	85.93006287	3.889537421	0.576850887	-0.300897604	0.877748491	0.346328255	49.83500049
2	6	3	19	1	13	0	group	1	0.79	296	0.92	1	0	166.6362419	135.0629634	31.57327853	147.9611533	52.81610133	0.353587034	-0.244209428	0.597796462	88.56672102	84.92986016	3.63686086	85.93006287	3.889537421	0.677884762	-0.257152098	0.935036861	0.29685279	53.3873367
2	6	3	19	1	14	0	personal	1	0.79	238	0.74	1	0	175.044092	129.5558403	45.48825175	147.9611533	52.81610133	0.512778074	-0.348479204	0.861257279	89.41894255	84.20918071	5.209761847	85.93006287	3.889537421	0.896990902	-0.442438772	1.339429674	0.516743746	52.53017654
2	7	1	1	1	1	0	blue	1	8.33	636	21.39	1	0	106.2325149	101.4039142	4.828600699	118.3060725	56.63017727	-0.213200068	-0.298465573	0.085265506	80.77307051	79.96764187	0.805428641	81.79422806	4.43399672	-0.230301828	-0.41195028	0.181648452	0.234777663	62.72576321
2	7	1	1	0	2	0	drum							115.5258633	106.2847353	9.241128016	118.3060725	56.63017727	-0.049094129	-0.212277937	0.163183808	82.22486473	80.78149581	1.443368919	81.79422806	4.43399672	0.097121558	-0.228401669	0.325523227	0.349770805	60.24777929
2	7	1	1	1	3	0	yellow	1	8.33	434	14.59	1	0	102.4093661	93.9863192	8.423046946	118.3060725	56.63017727	-0.280710872	-0.429448653	0.148737781	80.13844877	78.65330448	1.485144292	81.79422806	4.43399672	-0.373428172	-0.708373005	0.334944833	0.27310871	59.71883015
2	7	1	1	0	4	0	drum							145.5112103	121.3855275	24.12568288	118.3060725	56.63017727	0.480400011	0.054378339	0.426021672	86.21999801	83.08143134	3.138566667	81.79422806	4.43399672	0.998144615	0.290303165	0.707841451	0.397684613	53.49082453
2	7	1	2	0	1	0	blue							108.6322808	100.3680075	8.264273355	118.3060725	56.63017727	-0.17082397	-0.316758059	0.145934088	81.15975614	79.79106502	1.368691114	81.79422806	4.43399672	-0.143092555	-0.451773686	0.30868113	0.193715341	62.33056709
2	7	1	2	1	2	0	drum	1	9.09	204	7.98	1	0	112.9021546	106.1184536	6.783700992	118.3060725	56.63017727	-0.095424704	-0.215214211	0.119789507	81.82716189	80.75438541	1.072776483	81.79422806	4.43399672	0.007427572	-0.234515882	0.241943454	0.362524423	59.66983594
2	7	1	2	0	3	0	blue							103.8272724	100.1662377	3.661034653	118.3060725	56.63017727	-0.255672873	-0.320320997	0.064648124	80.37682652	79.75508496	0.621741567	81.79422806	4.43399672	-0.319666799	-0.459888274	0.140221475	0.262899391	62.47229336
2	7	1	2	1	4	0	ball	1	9.09	260	10.17	1	0	80.58595351	70.85997509	9.725978413	118.3060725	56.63017727	-0.666078067	-0.837823573	0.171745505	75.98947785	73.76278864	2.226689209	81.79422806	4.43399672	-1.309146257	-1.811331836	0.502185579	0.235225771	57.40291021
2	7	1	3	0	1	0	gold							110.5069496	107.2733093	3.233640311	118.3060725	56.63017727	-0.137720263	-0.194821273	0.05710101	81.45593158	80.94176078	0.514170804	81.79422806	4.43399672	-0.07629606	-0.192257084	0.115961024	0.20997687	62.33456822
2	7	1	3	1	2	0	sock	0	0	0	0	0	0	128.2309148	109.5551945	18.67572026	118.3060725	56.63017727	0.175257129	-0.154526764	0.329783893	84.0312037	81.30619738	2.725006315	81.79422806	4.43399672	0.504505479	-0.110065638	0.614571118	0.379049155	61.20163867
2	7	1	3	0	3	0	gold							101.7202013	98.27840012	3.441801226	118.3060725	56.63017727	-0.29288044	-0.353657244	0.060776804	80.02176764	79.42563058	0.596137057	81.79422806	4.43399672	-0.399743286	-0.534190174	0.134446888	0.199068981	63.20446424
2	7	1	3	1	4	0	star	0	0	0	0	0	0	105.7514278	94.14924214	11.60218568	118.3060725	56.63017727	-0.22169531	-0.426571689	0.204876379	80.69439999	78.68255717	2.011842819	81.79422806	4.43399672	-0.248044403	-0.701775641	0.453731238	0.455404381	56.98485897
2	7	1	4	1	1	0	gold	1	9.09	330	10.65	1	0	110.9760031	103.6248464	7.35115668	118.3060725	56.63017727	-0.129437515	-0.259247398	0.129809883	81.52924727	80.34271839	1.186528884	81.79422806	4.43399672	-0.059761161	-0.327359211	0.267598051	0.211499645	64.18494298
2	7	1	4	0	2	0	sock							110.6331536	104.96549	5.667663601	118.3060725	56.63017727	-0.135491699	-0.235573738	0.100082039	81.4756797	80.56525529	0.910424408	81.79422806	4.43399672	-0.071842263	-0.277170428	0.205328165	0.377445521	59.84754737
2	7	1	4	1	3	0	red	2	18.18	736	23.74	1	0	106.3936934	98.12668537	8.267008039	118.3060725	56.63017727	-0.210353909	-0.356336288	0.14598238	80.79936279	79.39831453	1.401048264	81.79422806	4.43399672	-0.224372126	-0.540350767	0.315978642	0.253799574	63.82893002
2	7	1	4	0	4	0	sock							--undefined--	--undefined--	#VALUE!	118.3060725	56.63017727	#VALUE!	#VALUE!	#VALUE!	--undefined--	--undefined--	#VALUE!	81.79422806	4.43399672	#VALUE!	#VALUE!	#VALUE!	0.37419168	53.00521929
2	7	1	5	0	1	1	yellow							106.3828005	100.3996406	5.983159835	118.3060725	56.63017727	-0.21054626	-0.316199468	0.105653208	80.79757322	79.79532444	1.002248777	81.79422806	4.43399672	-0.224775728	-0.450813058	0.22603733	0.288401931	65.53200781
2	7	1	5	1	2	1	tree	1	7.69	148	4.98	1	0	116.2523382	106.4721421	9.780196105	118.3060725	56.63017727	-0.036265723	-0.208968628	0.172702905	82.33339108	80.81198806	1.521403019	81.79422806	4.43399672	0.121597523	-0.221524747	0.34312227	0.443456732	59.18571735
2	7	1	5	0	3	1	yellow							103.3303713	97.8926681	5.437703234	118.3060725	56.63017727	-0.264447366	-0.360468666	0.096021299	80.29343544	79.35760159	0.935833856	81.79422806	4.43399672	-0.338474003	-0.549532763	0.21105876	0.254289874	65.48968241
2	7	1	5	1	4	1	star	0	0	0	0	0	0	88.52090487	70.32018247	18.2007224	118.3060725	56.63017727	-0.525959287	-0.847355463	0.321396176	77.61535552	73.63040291	3.984952614	81.79422806	4.43399672	-0.942461802	-1.841188811	0.898727009	0.356626043	56.17606706
2	7	1	6	1	1	1	yellow	2	18.18	670	17.04	2	0	107.9746055	102.8858739	5.088731643	118.3060725	56.63017727	-0.182437483	-0.272296492	0.089859009	81.05459171	80.21897779	0.835613917	81.79422806	4.43399672	-0.166810306	-0.355266449	0.188456143	0.292466717	62.65616401
2	7	1	6	0	2	1	tree							116.961222	94.45148405	22.50973798	118.3060725	56.63017727	-0.023747948	-0.421234572	0.397486624	82.43863776	78.73807158	3.700566183	81.79422806	4.43399672	0.145333824	-0.689255467	0.834589291	0.394386937	59.93731155
2	7	1	6	1	3	1	white	0	0	0	0	0	0	100.3727353	94.98592419	5.386811118	118.3060725	56.63017727	-0.316674573	-0.411797198	0.095122625	79.790732	78.83570201	0.955029991	81.79422806	4.43399672	-0.451848792	-0.66723686	0.215388069	0.257016206	60.03474392
2	7	1	6	0	4	1	tree							93.61283859	92.73065559	0.882183007	118.3060725	56.63017727	-0.436043734	-0.4516217	0.015577966	78.58361397	78.41970344	0.163910536	81.79422806	4.43399672	-0.724090317	-0.761057085	0.036966768	0.381092995	51.87473145
2	7	1	7	0	1	1	brown							112.8712456	105.2019046	7.669340972	118.3060725	56.63017727	-0.095970509	-0.231399027	0.135428518	81.82241028	80.60421096	1.218199317	81.79422806	4.43399672	0.006355941	-0.26838475	0.27474069	0.358411768	61.89374473
2	7	1	7	1	2	1	angel	1	5.88	300	8.56	1	0	117.9740303	103.148499	14.82553126	118.3060725	56.63017727	-0.005863344	-0.267658945	0.261795601	82.58790603	80.26297822	2.324927817	81.79422806	4.43399672	0.178998321	-0.345343025	0.524341346	0.440749607	59.16950061
2	7	1	7	0	3	1	brown							105.8906482	103.4114745	2.479173675	118.3060725	56.63017727	-0.219236897	-0.263015211	0.043778314	80.71718011	80.30703709	0.410143022	81.79422806	4.43399672	-0.242906799	-0.335406421	0.092499622	0.222796505	61.58917606
2	7	1	7	1	4	1	egg	0	0	0	0	0	0	105.1026454	92.98368481	12.11896057	118.3060725	56.63017727	-0.233151789	-0.447153602	0.214001813	80.58786108	78.4669314	2.12092968	81.79422806	4.43399672	-0.272072141	-0.750405756	0.478333615	0.271230527	58.64525695
2	7	1	8	1	1	1	brown	2	20	518	24.32	2	0	107.8622685	105.8801001	1.982168395	118.3060725	56.63017727	-0.184421179	-0.21942316	0.035001981	81.03656408	80.71549904	0.32106504	81.79422806	4.43399672	-0.17087608	-0.243285931	0.072409851	0.254898816	62.34158663
2	7	1	8	0	2	1	angel							106.2038948	85.26810203	20.93579277	118.3060725	56.63017727	-0.213705454	-0.583398677	0.369693223	80.76831439	76.97098003	3.797334355	81.79422806	4.43399672	-0.231374476	-1.087787911	0.856413435	0.395906672	60.06567416
2	7	1	8	1	3	1	green	1	10	202	9.48	1	0	101.9759219	99.62957493	2.346347005	118.3060725	56.63017727	-0.288364816	-0.329797619	0.041432803	80.06504164	79.66209554	0.402946096	81.79422806	4.43399672	-0.389983694	-0.480860193	0.090876499	0.238628679	62.56850427
2	7	1	8	0	4	1	angel							142.8609136	89.7692659	53.09164766	118.3060725	56.63017727	0.433599933	-0.503915192	0.937515125	85.9016093	77.85813307	8.043476229	81.79422806	4.43399672	0.926338358	-0.887708142	1.8140465	0.455563842	55.99708046
2	7	1	9	0	1	2	blue							121.1058455	101.1333187	19.97252678	118.3060725	56.63017727	0.049439594	-0.303243865	0.352683459	83.0414963	79.92162006	3.119876245	81.79422806	4.43399672	0.281296609	-0.422329586	0.703626195	0.240641274	65.85107804
2	7	1	9	1	2	2	egg	1	12.5	184	9.17	1	0	115.128456	104.2020725	10.92638354	118.3060725	56.63017727	-0.056111718	-0.249054492	0.192942774	82.1652419	80.4388826	1.726359302	81.79422806	4.43399672	0.083674812	-0.305671282	0.389346093	0.254796643	63.02732668
2	7	1	9	0	3	2	blue							103.6800733	101.4073792	2.272694098	118.3060725	56.63017727	-0.258272178	-0.298404387	0.040132209	80.351938	79.96837172	0.383566284	81.79422806	4.43399672	-0.325279911	-0.411785677	0.086505765	0.231204361	63.52666193
2	7	1	9	1	4	2	sock	0	0	0	0	0	0	104.0574397	92.71379065	11.34364902	118.3060725	56.63017727	-0.25160848	-0.451919509	0.200311028	80.41483566	78.41654451	1.998291154	81.79422806	4.43399672	-0.311094592	-0.761769519	0.450674927	0.311418119	55.81070632
2	7	1	10	1	1	2	blue	1	7.69	188	6.46	1	0	110.4498822	106.3836964	4.066185751	118.3060725	56.63017727	-0.138727984	-0.21053044	0.071802456	81.44694081	80.79762728	0.649313535	81.79422806	4.43399672	-0.07832375	-0.224763536	0.146439786	0.234090892	64.22071439
2	7	1	10	0	2	2	egg							113.442677	109.4501615	3.992515519	118.3060725	56.63017727	-0.085879928	-0.156381482	0.070501554	81.90987222	81.28957311	0.620299115	81.79422806	4.43399672	0.026081246	-0.113814913	0.139896159	0.2160839	62.9625571
2	7	1	10	1	3	2	brown	1	7.69	306	10.52	1	0	107.8506775	103.700234	4.150443461	118.3060725	56.63017727	-0.184625857	-0.257916172	0.073290314	81.034704	80.35530803	0.679395969	81.79422806	4.43399672	-0.171295584	-0.324519868	0.153224283	0.158098781	64.66766449
2	7	1	10	0	4	2	egg							106.6868086	70.84219211	35.84461652	118.3060725	56.63017727	-0.205177954	-0.838137592	0.632959638	80.84674442	73.7584434	7.08830102	81.79422806	4.43399672	-0.213686139	-1.812311819	1.59862568	0.230040884	58.94895978
2	7	1	11	0	1	2	green							109.126089	99.15992982	9.966159155	118.3060725	56.63017727	-0.162104093	-0.338090814	0.175986721	81.23824291	79.5810145	1.657228415	81.79422806	4.43399672	-0.125391421	-0.499146413	0.373754992	0.296896134	56.87190208
2	7	1	11	1	2	2	bell	2	14.29	370	13.7	2	0	111.2938451	104.4709899	6.82285522	118.3060725	56.63017727	-0.123824925	-0.244305833	0.120480908	81.57876095	80.48350581	1.095255139	81.79422806	4.43399672	-0.048594332	-0.295607402	0.24701307	0.300654313	59.69175159
2	7	1	11	0	3	2	green							107.9069492	103.2853482	4.621601003	118.3060725	56.63017727	-0.183632188	-0.265242404	0.081610216	81.04372761	80.28578322	0.757944389	81.79422806	4.43399672	-0.169260488	-0.34019981	0.170939321	0.225490735	59.87331305
2	7	1	11	1	4	2	egg	2	14.29	818	30.3	1	0	99.05713887	71.04732991	28.00980896	118.3060725	56.63017727	-0.33990594	-0.834515181	0.49460924	79.56135998	73.80850231	5.752857663	81.79422806	4.43399672	-0.503579101	-1.801022025	1.297442924	0.199183482	55.35449296
2	7	1	12	1	1	2	green	2	22.22	528	25.34	2	1	107.0606495	100.3569832	6.703666308	118.3060725	56.63017727	-0.198576511	-0.316952731	0.11837622	80.907414	79.78798713	1.119426875	81.79422806	4.43399672	-0.200003319	-0.452467843	0.252464524	0.306037208	61.61549336
2	7	1	12	0	2	2	bell							114.8129402	106.7696882	8.043251954	118.3060725	56.63017727	-0.061683231	-0.203714431	0.142031199	82.11769731	80.86034988	1.257347432	81.79422806	4.43399672	0.072952073	-0.210617697	0.28356977	0.422814564	62.28432557
2	7	1	12	1	3	2	silver	2	22.22	640	30.71	1	0	107.126308	70.24961605	36.87669192	118.3060725	56.63017727	-0.197417085	-0.848601555	0.65118447	80.918029	73.61302122	7.305007779	81.79422806	4.43399672	-0.197609316	-1.845108907	1.647499591	0.390600121	61.83950463
2	7	1	12	0	4	2	bell							146.2502625	121.0550242	25.19523832	118.3060725	56.63017727	0.493450512	0.04854217	0.444908342	86.30756056	83.05736898	3.250191577	81.79422806	4.43399672	1.017892611	0.284876377	0.733016235	0.318117624	52.2683232
2	7	2	13	1	5	0	brother	2	13.33	424	12.41	2	1	122.7619383	113.401614	9.360324276	118.3060725	56.63017727	0.078683592	-0.086605036	0.165288628	83.27664381	81.9035718	1.373072017	81.79422806	4.43399672	0.334329465	0.024660311	0.309669153	0.51162662	66.24743153
2	7	2	13	0	6	0	doctor							151.6491273	80.2913669	71.3577604	118.3060725	56.63017727	0.588785986	-0.671280004	1.26006599	86.93512063	75.92607563	11.00904499	81.79422806	4.43399672	1.159426336	-1.32344537	2.482871706	0.534969407	54.96971319
2	7	2	13	0	5	0	brother							119.1112896	101.9979452	17.11334437	118.3060725	56.63017727	0.014218869	-0.287975919	0.302194788	82.75400075	80.06905199	2.684948765	81.79422806	4.43399672	0.216457691	-0.389079239	0.60553693	0.560756925	66.55295055
2	7	2	13	1	6	0	doctor	1	7.69	114	3.63	1	0	143.481624	107.0183267	36.46329736	118.3060725	56.63017727	0.444560704	-0.199323865	0.643884569	85.98296954	80.9005788	5.082390745	81.79422806	4.43399672	0.944687546	-0.201544863	1.146232409	0.491329877	55.26803311
2	7	2	14	0	5	0	He							139.7511833	100.7188472	39.03233617	118.3060725	56.63017727	0.378686979	-0.310562781	0.68924976	85.59528812	79.8523347	5.74295342	81.79422806	4.43399672	0.857253692	-0.437955525	1.295209217	0.116397781	58.8157433
2	7	2	14	1	6	0	study	2	15.38	498	14.79	2	0	108.3711959	88.99845491	19.37274103	118.3060725	56.63017727	-0.17543432	-0.517526503	0.342092183	81.11812547	77.70850062	3.409624855	81.79422806	4.43399672	-0.152481527	-0.921454773	0.768973246	0.442684135	58.85674097
2	7	2	14	1	5	0	He	1	6.67	164	3.63	1	0	125.4335438	111.1611131	14.27243071	118.3060725	56.63017727	0.12585995	-0.126168763	0.252028713	83.6493528	81.55810051	2.091252281	81.79422806	4.43399672	0.418386584	-0.053253885	0.471640468	0.08562849	63.50985754
2	7	2	14	0	6	0	study							106.4294364	95.8279667	10.60146975	118.3060725	56.63017727	-0.209722743	-0.39692805	0.187205307	80.80504103	78.98849823	1.816542799	81.79422806	4.43399672	-0.223091511	-0.632776704	0.409685193	0.319460136	57.3724689
2	7	2	15	0	5	0	three							120.7904114	114.968874	5.821537437	118.3060725	56.63017727	0.043869523	-0.058929685	0.102799208	82.99637141	82.1412183	0.855153111	81.79422806	4.43399672	0.271119585	0.078256765	0.19286282	0.372505998	62.45323736
2	7	2	15	1	6	0	shirts	1	8.33	280	8.46	1	0	119.2911074	98.7413341	20.54977328	118.3060725	56.63017727	0.017394169	-0.345482557	0.362876726	82.78011228	79.50698679	3.273125494	81.79422806	4.43399672	0.222346628	-0.515841895	0.738188523	0.59314058	57.86740519
2	7	2	15	1	5	0	three	1	6.67	364	10.51	1	0	120.9377972	104.4533472	16.48445004	118.3060725	56.63017727	0.046472125	-0.244617375	0.2910895	83.01755742	80.48512071	2.532436714	81.79422806	4.43399672	0.275897669	-0.295243193	0.571140862	0.548615291	60.17243024
2	7	2	15	0	6	0	shirts							142.008869	97.90884038	44.10002866	118.3060725	56.63017727	0.418554163	-0.360183089	0.778737252	85.79910297	79.36040669	6.438696279	81.79422806	4.43399672	0.903220089	-0.548900129	1.452120217	0.526816008	52.77121147
2	7	3	16	1	7	1	must	1	0.76	368	1.23	1	0	100.6296831	80.23877429	20.39090884	118.3060725	56.63017727	-0.312137279	-0.672208707	0.360071428	79.83494538	75.91473195	3.920213429	81.79422806	4.43399672	-0.441877341	-1.326003712	0.884126371	0.264391793	58.33366472
2	7	3	16	1	8	1	may	0	0	0	0	0	0	102.2466668	97.13932605	5.107340707	118.3060725	56.63017727	-0.283583886	-0.373771503	0.090187617	80.11104651	79.22380619	0.887240318	81.79422806	4.43399672	-0.379608208	-0.579707662	0.200099453	0.310151911	61.1760117
2	7	3	17	1	9	1	allow	0	0	0	0	0	0	140.776126	133.1665752	7.609550805	118.3060725	56.63017727	0.396785858	0.262413141	0.134372717	85.64710656	84.6862898	0.960816763	81.79422806	4.43399672	0.868940314	0.652247154	0.21669316	0.149250218	60.33224286
2	7	3	17	1	10	1	requires	1	0.76	298	1	1	0	113.0730984	102.3743579	10.6987405	118.3060725	56.63017727	-0.092406105	-0.281329062	0.188922956	81.85334308	80.13258745	1.720755631	81.79422806	4.43399672	0.01333222	-0.374750076	0.388082297	0.36045454	58.31018399
2	7	3	18	1	11	0	personal	2	1.13	366	0.81	2	0	104.1592591	91.18026554	12.97899354	118.3060725	56.63017727	-0.249810509	-0.478999154	0.229188644	80.43176737	78.12779647	2.303970905	81.79422806	4.43399672	-0.307275981	-0.826890912	0.519614931	0.56664421	54.88726567
2	7	3	18	1	12	0	group	3	1.69	916	2.02	1	0	92.77601124	90.37342073	2.402590514	118.3060725	56.63017727	-0.450820791	-0.493246766	0.042425975	78.42852887	77.97384611	0.454682755	81.79422806	4.43399672	-0.759066685	-0.861611361	0.102544677	0.168461792	60.37450633
2	7	3	19	1	13	0	group	2	1.13	482	1.06	1	0	107.754966	95.52183718	12.23312884	118.3060725	56.63017727	-0.186315972	-0.402333817	0.216017844	81.01932659	78.93310942	2.086217167	81.79422806	4.43399672	-0.174763654	-0.645268551	0.470504897	0.260350042	58.63363
2	7	3	19	1	14	0	personal	2	1.13	400	0.88	1	0	142.3186539	121.2886893	21.02996461	118.3060725	56.63017727	0.424024478	0.052668328	0.37135615	85.85452055	83.08923525	2.765285304	81.79422806	4.43399672	0.915718424	0.292063182	0.623655243	0.331818682	53.65608083
2	8	1	1	1	1	0	blue	4	11.43	242	6.99	2	1	138.6152262	131.2153829	7.399843334	135.35301	35.23724004	0.092578651	-0.117421998	0.21000065	85.37935939	84.42962689	0.949732501	84.69117005	2.653188054	0.259382043	-0.098576941	0.357958984	0.262572672	67.00292474
2	8	1	1	0	2	0	drum							136.1330972	111.817677	24.3154202	135.35301	35.23724004	0.022138146	-0.667910796	0.690048942	85.06648883	81.66031557	3.406173262	84.69117005	2.653188054	0.141459546	-1.142344387	1.283803933	0.268473181	64.74945364
2	8	1	1	1	3	0	yellow	3	8.57	538	15.54	3	1	170.0613555	138.5571156	31.50423995	135.35301	35.23724004	0.984990465	0.090929527	0.894060939	88.91893839	85.37207156	3.546866821	84.69117005	2.653188054	1.593467275	0.256635223	1.336832052	0.447818277	68.11778941
2	8	1	1	0	4	0	drum							154.7464621	73.90333529	80.84312684	135.35301	35.23724004	0.550368077	-1.743884444	2.294252522	87.28515139	74.49144121	12.79371019	84.69117005	2.653188054	0.977684689	-3.8443294	4.822014089	0.262572672	62.17569816
2	8	1	2	0	1	0	blue							153.1651801	128.0263218	25.13885827	135.35301	35.23724004	0.505492769	-0.207924577	0.713417347	87.10733688	84.00382516	3.103511725	84.69117005	2.653188054	0.910665501	-0.259063767	1.169729268	0.295452775	70.33805673
2	8	1	2	1	2	0	drum	1	11.11	192	13.91	1	0	143.3612505	108.869698	34.49155255	135.35301	35.23724004	0.227266393	-0.75157169	0.978838083	85.9621358	81.19793112	4.764204681	84.69117005	2.653188054	0.47903342	-1.316619425	1.795652846	0.234779437	67.47011597
2	8	1	2	0	3	0	blue							134.5011909	128.2202694	6.280921581	135.35301	35.23724004	-0.024173833	-0.202420526	0.178246693	84.85774253	84.02976685	0.827975681	84.69117005	2.653188054	0.06278201	-0.249286213	0.312068222	0.292814804	67.47572987
2	8	1	2	1	4	0	ball	0	0	0	0	0	0	129.972458	103.2619887	26.71046923	135.35301	35.23724004	-0.152695048	-0.910713249	0.758018201	84.26474555	80.28227755	3.982467992	84.69117005	2.653188054	-0.160721552	-1.661733888	1.501012336	0.232141466	67.16808107
2	8	1	3	0	1	0	gold							149.49791	137.183485	12.31442505	135.35301	35.23724004	0.401419065	0.051947172	0.349471894	86.6877813	85.19955601	1.488225286	84.69117005	2.653188054	0.75253288	0.19161324	0.560919641	0.242884955	66.8380908
2	8	1	3	1	2	0	sock	1	16.67	156	19.12	1	0	141.4252435	123.9993308	17.42591272	135.35301	35.23724004	0.172324321	-0.322206825	0.494531146	85.72675014	83.4502623	2.276487846	84.69117005	2.653188054	0.390315374	-0.467704409	0.858019784	0.299447205	65.52969034
2	8	1	3	0	3	0	gold							153.7384939	129.5459735	24.19252044	135.35301	35.23724004	0.52176288	-0.16479828	0.68656116	87.17946571	84.20792078	2.971544928	84.69117005	2.653188054	0.937851222	-0.182139095	1.119990317	0.329391925	64.99332887
2	8	1	3	1	4	0	star	0	0	0	0	0	0	143.3299355	118.0075857	25.32234985	135.35301	35.23724004	0.226377703	-0.492246962	0.718624664	85.95835378	82.59282949	3.365524294	84.69117005	2.653188054	0.477607958	-0.790875173	1.268483131	0.192977088	62.12728718
2	8	1	4	1	1	0	gold	1	8.33	58	3.81	1	0	145.7265093	136.4048495	9.321659784	135.35301	35.23724004	0.294390232	0.029850222	0.264540009	86.2454344	85.10265581	1.142778589	84.69117005	2.653188054	0.585810096	0.155091064	0.430719032	0.28487726	69.54476168
2	8	1	4	0	2	0	sock							142.0711335	123.1208367	18.95029679	135.35301	35.23724004	0.190654076	-0.347137668	0.537791745	85.80563571	83.32717357	2.478462138	84.69117005	2.653188054	0.420047745	-0.514097174	0.934144919	0.275881136	65.22057657
2	8	1	4	1	3	0	red	0	0	0	0	0	0	136.0202887	125.3829642	10.63732449	135.35301	35.23724004	0.018936746	-0.2829406	0.301877346	85.05293699	83.64179351	1.411143484	84.69117005	2.653188054	0.136351789	-0.395515327	0.531867117	0.275881136	66.33388543
2	8	1	4	0	4	0	sock							139.5802296	123.7857649	15.79446472	135.35301	35.23724004	0.119964547	-0.328267626	0.448232174	85.4994096	83.42041929	2.078990316	84.69117005	2.653188054	0.304629575	-0.478952391	0.783581965	0.242895348	58.76264986
2	8	1	5	0	1	1	yellow							139.9200647	128.3157546	11.60431012	135.35301	35.23724004	0.129608751	-0.199710745	0.329319495	85.54220695	84.04266665	1.4995403	84.69117005	2.653188054	0.320760112	-0.244424213	0.565184325	0.320692589	69.9352438
2	8	1	5	1	2	1	tree	0	0	0	0	0	0	146.8699716	118.6744611	28.1955105	135.35301	35.23724004	0.326840625	-0.47332166	0.800162285	86.38079517	82.69038825	3.690406913	84.69117005	2.653188054	0.636828255	-0.754104783	1.390933038	0.314147842	63.29380437
2	8	1	5	0	3	1	yellow							168.2714638	126.0952008	42.176263	135.35301	35.23724004	0.934195008	-0.26272799	1.196922998	88.73576075	83.74044374	4.995317012	84.69117005	2.653188054	1.524426695	-0.358333557	1.882760252	0.425699899	68.26625143
2	8	1	5	1	4	1	star	0	0	0	0	0	0	132.7636131	111.5637204	21.19989266	135.35301	35.23724004	-0.07348467	-0.675117847	0.601633178	84.63259184	81.62069289	3.011898955	84.69117005	2.653188054	-0.022078424	-1.157278376	1.135199951	0.274879362	59.34402287
2	8	1	6	1	1	1	yellow	0	0	0	0	0	0	134.9064529	125.4046716	9.501781357	135.35301	35.23724004	-0.012672875	-0.282324564	0.269651689	84.90981066	83.64539204	1.264418621	84.69117005	2.653188054	0.082406751	-0.394159023	0.476565774	0.323205746	68.84292714
2	8	1	6	0	2	1	tree							145.7926656	127.7208931	18.07177255	135.35301	35.23724004	0.296267686	-0.216592359	0.512860045	86.253292	83.96315544	2.290136565	84.69117005	2.653188054	0.588771665	-0.27439239	0.863164055	0.39246412	60.29206293
2	8	1	6	1	3	1	white	0	0	0	0	0	0	169.1617213	127.7010471	41.46067418	135.35301	35.23724004	0.959459686	-0.21715557	1.176615256	88.82711203	84.03817038	4.788941643	84.69117005	2.653188054	1.558857455	-0.24611888	1.804976335	0.277033496	64.53790965
2	8	1	6	0	4	1	tree							145.0899126	112.4728634	32.61704919	135.35301	35.23724004	0.276324211	-0.649317217	0.925641428	86.16964091	81.76226897	4.407371936	84.69117005	2.653188054	0.557243146	-1.103917635	1.661160781	0.319358058	61.64415646
2	8	1	7	0	1	1	brown							139.5435214	122.6307782	16.91274323	135.35301	35.23724004	0.118922803	-0.361045071	0.479967874	85.49485603	83.2581694	2.236686635	84.69117005	2.653188054	0.302913311	-0.540105195	0.843018506	0.378079772	66.99300613
2	8	1	7	1	2	1	angel	0	0	0	0	0	0	142.3339334	111.0039648	31.32996858	135.35301	35.23724004	0.198112092	-0.691003189	0.889115282	85.83818974	81.53570677	4.302482963	84.69117005	2.653188054	0.432317523	-1.189310074	1.621627597	0.414278899	64.76578172
2	8	1	7	0	3	1	brown							135.588066	123.706471	11.88159494	135.35301	35.23724004	0.006670669	-0.330517913	0.337188582	84.99703996	83.40936705	1.587672916	84.69117005	2.653188054	0.115283916	-0.483118036	0.598401952	0.317747894	66.62907208
2	8	1	7	1	4	1	egg	0	0	0	0	0	0	145.2557005	108.0906125	37.16508803	135.35301	35.23724004	0.281029117	-0.77368141	1.054710527	86.18941167	81.07345965	5.115952022	84.69117005	2.653188054	0.564694845	-1.363533352	1.928228198	0.357969146	66.32254377
2	8	1	8	1	1	1	brown	0	0	0	0	0	0	146.3289746	135.3969119	10.93206273	135.35301	35.23724004	0.311487635	0.001245894	0.310241741	86.31682686	84.97261328	1.344213584	84.69117005	2.653188054	0.612718275	0.106077377	0.506640899	0.201300951	69.2413547
2	8	1	8	0	2	1	angel							153.0293861	109.0007145	44.02867159	135.35301	35.23724004	0.501639062	-0.747853564	1.249492626	87.09198183	81.21834895	5.873632887	84.69117005	2.653188054	0.904878105	-1.308923842	2.213801947	0.671003171	66.24454475
2	8	1	8	1	3	1	green	1	10	82	11.71	1	0	145.9952055	130.3313063	15.66389918	135.35301	35.23724004	0.302015579	-0.142511268	0.444526847	86.27732618	84.31258793	1.964738249	84.69117005	2.653188054	0.597830269	-0.142689517	0.740519786	0.206892644	63.29439523
2	8	1	8	0	4	1	angel							139.7128716	104.2447619	35.46810973	135.35301	35.23724004	0.123728804	-0.882823062	1.006551866	85.51610367	80.44598071	5.070122967	84.69117005	2.653188054	0.310921654	-1.600033339	1.910954993	0.447335447	61.10900146
2	8	1	9	0	1	2	blue							140.9530244	127.0366663	13.91635813	135.35301	35.23724004	0.158923183	-0.236010077	0.394933261	85.66884749	83.86932684	1.799520644	84.69117005	2.653188054	0.368491572	-0.309756864	0.678248437	0.217059478	67.53843353
2	8	1	9	1	2	2	egg	1	16.67	150	24.59	1	0	143.8775878	108.3557332	35.52185462	135.35301	35.23724004	0.241919564	-0.766157532	1.008077096	86.0243768	81.11637023	4.90800657	84.69117005	2.653188054	0.502492368	-1.347360138	1.849852506	0.40072519	65.1815535
2	8	1	9	0	3	2	blue							135.0591747	131.3440629	3.715111777	135.35301	35.23724004	-0.008338773	-0.11377018	0.105431407	84.92937403	84.44676604	0.482607998	84.69117005	2.653188054	0.089780284	-0.092117108	0.181897393	0.256018871	69.14011065
2	8	1	9	1	4	2	sock	0	0	0	0	0	0	137.1958361	104.5365818	32.65925438	135.35301	35.23724004	0.052297684	-0.874541485	0.92683917	85.20111464	80.49438352	4.706731115	84.69117005	2.653188054	0.192200695	-1.581790075	1.77399077	0.294978265	61.35259247
2	8	1	10	1	1	2	blue	0	0	0	0	0	0	140.9865711	126.7061809	14.28039018	135.35301	35.23724004	0.159875207	-0.245388945	0.405264152	85.67397237	83.82455269	1.849419678	84.69117005	2.653188054	0.370423166	-0.326632468	0.697055633	0.219868461	67.05985701
2	8	1	10	0	2	2	egg							142.6621974	71.57962056	71.08257685	135.35301	35.23724004	0.207427918	-1.8098293	2.017257219	85.87751148	73.93772389	11.93978759	84.69117005	2.653188054	0.447138086	-4.053028259	4.500166345	0.450621498	64.88328391
2	8	1	10	1	3	2	brown	1	10	120	16.17	1	0	161.6102712	126.5674102	35.04286101	135.35301	35.23724004	0.745156577	-0.249327128	0.994483704	88.03650098	83.8047902	4.231710781	84.69117005	2.653188054	1.260872151	-0.33408105	1.594953201	0.296060501	67.95165329
2	8	1	10	0	4	2	egg							138.3242435	102.0518276	36.27241587	135.35301	35.23724004	0.084320834	-0.945056492	1.029377325	85.34292268	80.11890814	5.22401454	84.69117005	2.653188054	0.245648863	-1.723308645	1.968957508	0.391844781	61.17401503
2	8	1	11	0	1	2	green							146.9035376	131.6584589	15.24507873	135.35301	35.23724004	0.327793197	-0.104847915	0.432641112	86.38470393	84.48787689	1.896827042	84.69117005	2.653188054	0.638301486	-0.076622221	0.714923707	0.438522662	70.59630124
2	8	1	11	1	2	2	bell	0	0	0	0	0	0	139.2807709	104.8548667	34.42590423	135.35301	35.23724004	0.111466189	-0.865508857	0.976975046	85.4622274	80.54700016	4.915227239	84.69117005	2.653188054	0.290615415	-1.561958597	1.852574013	0.289135821	68.35869148
2	8	1	11	0	3	2	green							133.3754278	124.4798324	8.89559542	135.35301	35.23724004	-0.056121939	-0.308570638	0.252448699	84.71218906	83.51755614	1.194632924	84.69117005	2.653188054	0.007922171	-0.442341021	0.450263191	0.327687264	64.08371739
2	8	1	11	1	4	2	egg	0	0	0	0	0	0	142.5124533	103.6204817	38.89197159	135.35301	35.23724004	0.203178321	-0.900539552	1.103717872	85.86557144	80.34199235	5.523579092	84.69117005	2.653188054	0.442637824	-1.639227078	2.081864902	0.390333358	62.20583694
2	8	1	12	1	1	2	green	1	7.69	304	20.05	1	0	145.6301317	128.0655422	17.56458946	135.35301	35.23724004	0.291655125	-0.206811539	0.498466664	86.23520272	84.01025847	2.224944247	84.69117005	2.653188054	0.581953724	-0.25663902	0.838592744	0.374190692	69.95525207
2	8	1	12	0	2	2	bell							145.2704756	107.5301462	37.74032937	135.35301	35.23724004	0.281448421	-0.78958692	1.071035341	86.19308447	80.98340374	5.20968073	84.69117005	2.653188054	0.566079142	-1.39747588	1.963555023	0.307370926	68.6059297
2	8	1	12	1	3	2	silver	2	15.38	208	13.72	1	0	137.9900781	130.4204296	7.569648576	135.35301	35.23724004	0.074837531	-0.139982032	0.214819563	85.30104872	84.32435602	0.976692706	84.69117005	2.653188054	0.229866355	-0.138254064	0.36812042	0.458829063	66.75858361
2	8	1	12	0	4	2	bell							130.5341976	101.4941892	29.0400084	135.35301	35.23724004	-0.136753402	-0.960881749	0.824128347	84.33940807	79.98388919	4.355518886	84.69117005	2.653188054	-0.13258087	-1.774197971	1.6416171	0.227187206	64.50293344
2	8	2	13	1	5	0	brother	1	6.67	70	5.56	1	0	138.376443	128.1664323	10.21001064	135.35301	35.23724004	0.085802207	-0.203948372	0.289750579	85.34947431	84.02254606	1.326928253	84.69117005	2.653188054	0.248118205	-0.252007765	0.50012597	0.395017097	68.30004241
2	8	2	13	0	6	0	doctor							152.0768561	109.4879186	42.58893751	135.35301	35.23724004	0.47460715	-0.734027166	1.208634316	86.98388163	81.2954261	5.688455528	84.69117005	2.653188054	0.864134593	-1.279873074	2.144007667	0.417850455	60.32838521
2	8	2	13	0	5	0	brother							142.2918638	125.7371075	16.55475635	135.35301	35.23724004	0.196918196	-0.272890344	0.46980854	85.83414728	83.69124639	2.142900896	84.69117005	2.653188054	0.4307939	-0.376876287	0.807670186	0.407039955	66.19030459
2	8	2	13	1	6	0	doctor	1	6.25	40	2.41	1	0	145.7900699	109.914134	35.87593583	135.35301	35.23724004	0.296194022	-0.721931571	1.018125593	86.25298377	81.36296774	4.890016028	84.69117005	2.653188054	0.588655491	-1.254416289	1.84307178	0.419268623	59.83594783
2	8	2	14	0	5	0	He							147.5690954	140.6833112	6.885784227	135.35301	35.23724004	0.346681106	0.151268974	0.195412132	86.46295958	85.63570904	0.827250542	84.69117005	2.653188054	0.667796437	0.356001523	0.311794914	0.08963079	64.40520668
2	8	2	14	1	6	0	study	0	0	0	0	0	0	141.106924	122.1180162	18.98890782	135.35301	35.23724004	0.16329071	-0.375596779	0.538887489	85.69562885	83.1856149	2.510013956	84.69117005	2.653188054	0.378585603	-0.567451353	0.946036956	0.475834507	60.48747317
2	8	2	14	1	5	0	He	1	5	78	7.32	1	0	153.0227556	71.95539027	81.06736535	135.35301	35.23724004	0.501450895	-1.799165307	2.300616202	87.53010818	74.02795087	13.50215731	84.69117005	2.653188054	1.070010143	-4.019021254	5.089031397	0.246038622	64.83774569
2	8	2	14	0	6	0	study							136.5581149	110.3161188	26.24199606	135.35301	35.23724004	0.034199752	-0.710523617	0.744723369	85.12051901	81.42600443	3.694514579	84.69117005	2.653188054	0.161823794	-1.230657441	1.392481236	0.504803379	62.30613534
2	8	2	15	0	5	0	three							144.5520618	135.1804324	9.371629345	135.35301	35.23724004	0.261060507	-0.004897593	0.2659581	86.10534452	84.94519703	1.160147489	84.69117005	2.653188054	0.533009511	0.095744053	0.437265458	0.323770733	65.01592995
2	8	2	15	1	6	0	shirts	1	5.56	24	2.38	1	0	140.7535747	123.5589268	17.19464781	135.35301	35.23724004	0.153262987	-0.33470508	0.487968067	85.64433302	83.38866523	2.255667797	84.69117005	2.653188054	0.359251945	-0.490920657	0.850172601	0.378780324	60.35851598
2	8	2	15	1	5	0	three	1	4.35	54	2.37	1	0	142.5270695	131.4460553	11.0810142	135.35301	35.23724004	0.203593115	-0.110875731	0.314468846	85.86110568	84.45992698	1.401178701	84.69117005	2.653188054	0.440954657	-0.087156684	0.528111341	0.282552311	67.10476667
2	8	2	15	0	6	0	shirts							146.9728065	116.1726841	30.80012243	135.35301	35.23724004	0.329758983	-0.544319757	0.874078741	86.39286524	82.32160852	4.071256713	84.69117005	2.653188054	0.641377525	-0.893099729	1.534477254	0.449695931	58.77870415
2	8	3	16	1	7	1	must	1	0.94	154	0.67	1	0	135.979003	118.537086	17.44191697	135.35301	35.23724004	0.017765096	-0.477220237	0.494985333	85.04691761	82.67031406	2.376603556	84.69117005	2.653188054	0.134083054	-0.761670847	0.895753901	0.274016618	61.68726339
2	8	3	16	1	8	1	may	0	0	0	0	0	0	125.456104	119.4739505	5.982153462	135.35301	35.23724004	-0.280864961	-0.450632897	0.169767936	83.65384413	82.80803592	0.845808215	84.69117005	2.653188054	-0.390973388	-0.709762781	0.318789393	0.192826509	60.12494494
2	8	3	17	1	9	1	allows	0	0	0	0	0	0	138.0174819	117.8869929	20.13048904	135.35301	35.23724004	0.075615226	-0.495669273	0.571284498	85.30730116	82.5751341	2.732167059	84.69117005	2.653188054	0.232222932	-0.797544655	1.029767587	0.395801781	62.9014907
2	8	3	17	1	10	1	requires	1	0.94	184	0.8	1	0	145.3971724	124.6607806	20.73639181	135.35301	35.23724004	0.285043958	-0.303435497	0.588479455	86.20626484	83.54241977	2.663845064	84.69117005	2.653188054	0.57104689	-0.432969793	1.004016683	0.619074581	65.05964241
2	8	3	18	1	11	0	personal	1	0.86	264	1.1	1	0	143.5406522	117.3849949	26.15565728	135.35301	35.23724004	0.232357646	-0.509915508	0.742273154	85.98378685	82.50125032	3.482536529	84.69117005	2.653188054	0.48719381	-0.825391826	1.312585636	0.44089651	63.21472968
2	8	3	18	1	12	0	group	0	0	0	0	0	0	143.5846743	127.8624064	15.72226792	135.35301	35.23724004	0.233606952	-0.212576344	0.446183296	85.98909551	83.98144209	2.007653419	84.69117005	2.653188054	0.489194671	-0.267500059	0.756694731	0.245642341	61.21040749
2	8	3	19	1	13	0	group	3	2.59	316	1.31	3	0	135.052067	123.8209878	11.23107918	135.35301	35.23724004	-0.008540483	-0.327268033	0.31872755	84.92848329	83.42538469	1.503098605	84.69117005	2.653188054	0.08944456	-0.477080906	0.566525466	0.371612773	64.74655988
2	8	3	19	1	14	0	personal	1	0.86	212	0.88	1	0	158.0033445	113.0681191	44.93522545	135.35301	35.23724004	0.642795362	-0.632424416	1.275219777	87.64573544	81.85261708	5.793118361	84.69117005	2.653188054	1.113590642	-1.069864975	2.183455617	0.396806859	63.33083572
2	9	1	1	1	1	0	blue	1	9.09	174	7.37	1	0	104.0993854	97.59731232	6.502073045	188.9933548	98.86899689	-0.858651065	-0.924415594	0.06576453	80.42186869	79.30523416	1.116634531	88.92424808	7.671080172	-1.108367948	-1.253932133	0.145564185	0.255673428	59.98896416
2	9	1	1	0	2	0	drum							206.7342718	175.8071585	30.92711326	188.9933548	98.86899689	0.179438626	-0.133370386	0.312809013	92.29960517	89.49420006	2.805405106	88.92424808	7.671080172	0.440010665	0.074298791	0.365711875	0.302382997	56.78923614
2	9	1	1	1	3	0	yellow	1	9.09	236	10	1	0	195.6173553	176.2779139	19.33944136	188.9933548	98.86899689	0.066997751	-0.128608981	0.195606732	91.34272349	89.54049502	1.802228468	88.92424808	7.671080172	0.31527182	0.08033379	0.234938031	0.280257412	56.79754081
2	9	1	1	0	4	0	drum							--undefined--	--undefined--	#VALUE!	188.9933548	98.86899689	#VALUE!	#VALUE!	#VALUE!	--undefined--	--undefined--	#VALUE!	88.92424808	7.671080172	#VALUE!	#VALUE!	#VALUE!	0.272882217	50.50770389
2	9	1	2	0	1	0	blue							105.1004703	98.83194399	6.26852632	188.9933548	98.86899689	-0.848525697	-0.911928043	0.063402346	80.58750568	79.52318358	1.064322095	88.92424808	7.671080172	-1.086775553	-1.225520303	0.13874475	0.221812958	56.37725717
2	9	1	2	1	2	0	drum	2	16.67	448	17.1	2	1	237.5529033	101.9427696	135.6101338	188.9933548	98.86899689	0.491150411	-0.880463927	1.371614338	94.70526035	80.05938773	14.64587262	88.92424808	7.671080172	0.753611244	-1.155620871	1.909232115	0.318253374	59.15640658
2	9	1	2	0	3	0	blue							92.60730171	88.49329913	4.114002582	188.9933548	98.86899689	-0.974886528	-1.016497172	0.041610643	78.39664852	77.61017067	0.786477856	88.92424808	7.671080172	-1.372375118	-1.474900165	0.102525046	0.214579927	54.64647587
2	9	1	2	1	4	0	ball	1	8.33	414	15.8	1	0	100.9819051	89.26711314	11.714792	188.9933548	98.86899689	-0.890182489	-1.008670512	0.118488023	79.89543594	77.76068239	2.134753551	88.92424808	7.671080172	-1.176993583	-1.455279496	0.278285913	0.23386801	57.37778364
2	9	1	3	0	1	0	gold							200.822728	191.7781467	9.044581255	188.9933548	98.86899689	0.119646942	0.028166483	0.09148046	91.79734493	90.99955586	0.797789079	88.92424808	7.671080172	0.374536152	0.270536578	0.103999574	0.164663734	59.86944038
2	9	1	3	1	2	0	sock	3	17.65	488	19.2	2	1	111.9927897	100.518567	11.47422271	188.9933548	98.86899689	-0.778814063	-0.894868873	0.116054811	81.6871445	79.81874632	1.868398186	88.92424808	7.671080172	-0.943426925	-1.186990822	0.243563897	0.34814618	56.75909757
2	9	1	3	0	3	0	gold							194.9430476	82.70873094	112.2343166	188.9933548	98.86899689	0.060177538	-1.075004574	1.135182112	91.28290672	77.23597747	14.04692925	88.92424808	7.671080172	0.307474122	-1.523679892	1.831154014	0.191323576	56.70704488
2	9	1	3	1	4	0	star	1	5.88	68	2.68	1	0	104.1699259	91.89810182	12.27182412	188.9933548	98.86899689	-0.85793759	-0.982059655	0.124122065	80.43355406	78.26355795	2.169996115	88.92424808	7.671080172	-1.106844646	-1.38972477	0.282880124	0.33246392	56.89310111
2	9	1	4	1	1	0	gold	2	15.38	356	18.29	2	0	100.3778897	98.77518293	1.602706741	188.9933548	98.86899689	-0.896291739	-0.912502147	0.016210408	79.79157319	79.51293648	0.278636711	88.92424808	7.671080172	-1.190533104	-1.226856113	0.036323008	0.229766625	57.85591853
2	9	1	4	0	2	0	sock							102.3231198	97.668479	4.65464084	188.9933548	98.86899689	-0.876616915	-0.923695786	0.047078871	80.12434579	79.31785662	0.806489171	88.92424808	7.671080172	-1.147152955	-1.252286672	0.105133717	0.310495439	55.95164729
2	9	1	4	1	3	0	red	0	0	0	0	0	0	99.68400075	94.26205136	5.421949394	188.9933548	98.86899689	-0.903310005	-0.958149738	0.054839733	79.67148079	78.70327388	0.968206916	88.92424808	7.671080172	-1.206188318	-1.332403517	0.126215199	0.217346807	56.93799575
2	9	1	4	0	4	0	sock							103.8504505	102.1680743	1.682376168	188.9933548	98.86899689	-0.86116889	-0.878185106	0.017016216	80.38036588	80.09786005	0.282505828	88.92424808	7.671080172	-1.113778243	-1.150605629	0.036827386	0.326020211	53.907745
2	9	1	5	0	1	1	yellow							214.5306869	102.3182013	112.2124856	188.9933548	98.86899689	0.258294641	-0.876666662	1.134961304	92.94053773	80.12395828	12.81657944	88.92424808	7.671080172	0.523562466	-1.147203471	1.670765937	0.336776368	58.82035228
2	9	1	5	1	2	1	tree	1	6.67	164	5.42	1	0	100.2402684	85.86664998	14.37361845	188.9933548	98.86899689	-0.897683695	-1.043064136	0.145380442	79.76859407	77.08831203	2.680282041	88.92424808	7.671080172	-1.193528656	-1.54292952	0.349400864	0.368514455	54.61509079
2	9	1	5	0	3	1	yellow							201.6974939	89.38190949	112.3155844	188.9933548	98.86899689	0.128494669	-1.007509416	1.136004086	92.3201669	77.78314016	14.53702674	88.92424808	7.671080172	0.442691087	-1.452351907	1.895042994	0.326197006	56.2074478
2	9	1	5	1	4	1	star	3	20	760	25.12	2	0	189.5407057	93.68789634	95.85280938	188.9933548	98.86899689	0.005536122	-0.963956968	0.969493091	90.79636685	78.60565435	12.19071251	88.92424808	7.671080172	0.244048912	-1.345129173	1.589178085	0.335013141	55.68521184
2	9	1	6	1	1	1	yellow	3	25	502	21.69	2	1	218.0114881	178.0877471	39.923741	188.9933548	98.86899689	0.293500836	-0.110303615	0.403804451	93.21924672	89.71733298	3.501913743	88.92424808	7.671080172	0.559894897	0.10338634	0.456508557	0.345323035	59.89392013
2	9	1	6	0	2	1	tree							227.6938407	181.7302673	45.96357344	188.9933548	98.86899689	0.391431966	-0.07346173	0.464893696	93.97141747	90.06785893	3.903558537	88.92424808	7.671080172	0.657947678	0.149080811	0.508866868	0.304090434	56.16451818
2	9	1	6	1	3	1	white	1	8.33	234	10.11	1	0	106.8075785	93.99534329	12.8122352	188.9933548	98.86899689	-0.831259332	-0.960847329	0.129587996	80.86644247	78.654209	2.21223347	88.92424808	7.671080172	-1.050413427	-1.338799602	0.288386175	0.322129697	56.49667228
2	9	1	6	0	4	1	tree							255.59943	233.3991761	22.20025399	188.9933548	98.86899689	0.673680095	0.449137977	0.224542117	95.97288971	94.39986789	1.573021815	88.92424808	7.671080172	0.918859075	0.713800363	0.205058712	0.293782283	49.97690036
2	9	1	7	0	1	1	brown							106.0149729	99.67846867	6.336504201	188.9933548	98.86899689	-0.839276058	-0.903365959	0.064089901	80.73870615	79.67054812	1.068158039	88.92424808	7.671080172	-1.0670651	-1.206309901	0.139244801	0.261514336	59.61339906
2	9	1	7	1	2	1	angel	1	5.26	180	5.44	1	0	223.3882833	86.8894363	136.498847	188.9933548	98.86899689	0.347883862	-1.032719272	1.380603134	93.64144564	78.04045931	15.60098633	88.92424808	7.671080172	0.614932637	-1.41880785	2.033740488	0.476879084	57.58297595
2	9	1	7	0	3	1	brown							92.26428351	91.47333731	0.790946194	188.9933548	98.86899689	-0.978355949	-0.986355891	0.007999942	78.33241204	78.18335263	0.149059413	88.92424808	7.671080172	-1.380748969	-1.400180315	0.019431346	0.194853819	54.30702856
2	9	1	7	1	4	1	egg	2	10.53	318	9.62	2	0	100.7435437	92.31770393	8.425839769	188.9933548	98.86899689	-0.89259337	-0.977815634	0.085222264	79.85466196	78.34242525	1.512236711	88.92424808	7.671080172	-1.182308869	-1.37944365	0.197134781	0.253822738	54.46981414
2	9	1	8	1	1	1	brown	3	21.43	500	20.48	2	1	197.8080713	83.42592694	114.3821444	188.9933548	98.86899689	0.089155516	-1.067750571	1.156906087	91.53548981	77.39520086	14.14028895	88.92424808	7.671080172	0.340400787	-1.502923573	1.84332436	0.189447686	58.50852552
2	9	1	8	0	2	1	angel							206.6457346	93.38744683	113.2582878	188.9933548	98.86899689	0.178543126	-0.966995833	1.145538959	92.29223206	78.54189514	13.75033692	88.92424808	7.671080172	0.439049509	-1.353440807	1.792490316	0.56528745	57.05487258
2	9	1	8	1	3	1	green	2	14.29	302	12.37	2	0	94.7231529	88.07085298	6.652299926	188.9933548	98.86899689	-0.953485975	-1.020769958	0.067283983	78.78774453	77.5271128	1.260631726	88.92424808	7.671080172	-1.321391945	-1.485727567	0.164335622	0.195558902	55.88697234
2	9	1	8	0	4	1	angel							100.40565	94.44063983	5.965010187	188.9933548	98.86899689	-0.89601096	-0.956343424	0.060332464	79.79636097	78.7360389	1.060322071	88.92424808	7.671080172	-1.18990897	-1.328132277	0.138223307	0.433833525	51.6986085
2	9	1	9	0	1	2	blue							207.9734036	191.7770086	16.19639509	188.9933548	98.86899689	0.191971694	0.028154971	0.163816722	92.4030891	90.99943153	1.403657566	88.92424808	7.671080172	0.453500803	0.27052037	0.182980433	0.2207096	61.06206377
2	9	1	9	1	2	2	egg	2	15.38	614	25.5	2	1	224.3749769	104.7799504	119.5950265	188.9933548	98.86899689	0.35786367	-0.851767562	1.209631232	94.17166947	80.53462648	13.63704299	88.92424808	7.671080172	0.684052477	-1.093668872	1.777721349	0.287135892	57.70311002
2	9	1	9	0	3	2	blue							99.56992519	93.6990322	5.870892998	188.9933548	98.86899689	-0.90446381	-0.963844336	0.059380525	79.65167322	78.5995469	1.052126325	88.92424808	7.671080172	-1.208770428	-1.345925339	0.137154911	0.212054322	56.60123449
2	9	1	9	1	4	2	sock	3	23.08	298	12.38	2	0	194.5487021	178.739019	15.80968312	188.9933548	98.86899689	0.056188972	-0.103716394	0.159905366	91.24785055	89.78090834	1.466942202	88.92424808	7.671080172	0.302904209	0.111674007	0.191230202	0.207726683	54.42153381
2	9	1	10	1	1	2	blue	2	15.38	330	13.97	1	0	103.880396	97.43733031	6.443065657	188.9933548	98.86899689	-0.86086601	-0.926033715	0.065167706	80.38536387	79.27700815	1.108355722	88.92424808	7.671080172	-1.113126707	-1.257611668	0.144484961	0.227207762	59.68857818
2	9	1	10	0	2	2	egg							100.9959978	87.19079229	13.80520548	188.9933548	98.86899689	-0.89003995	-1.029671239	0.139631289	79.89785176	77.3532466	2.54460516	88.92424808	7.671080172	-1.176678658	-1.508392719	0.331714061	0.314595363	54.83265249
2	9	1	10	1	3	2	brown	2	15.38	222	9.4	1	0	190.657329	183.7682879	6.889041012	188.9933548	98.86899689	0.016830091	-0.052848386	0.069678477	90.89806851	90.2609132	0.637155308	88.92424808	7.671080172	0.257306714	0.174247315	0.083059399	0.192252722	57.97935291
2	9	1	10	0	4	2	egg							97.85545181	87.64448558	10.21096623	188.9933548	98.86899689	-0.92180467	-1.025082406	0.103277737	79.3509639	77.44315253	1.907811363	88.92424808	7.671080172	-1.247970816	-1.496672606	0.24870179	0.227207762	52.67852253
2	9	1	11	0	1	2	green							227.5728264	192.893264	34.67956235	188.9933548	98.86899689	0.39020798	0.039445218	0.350762762	93.96221389	91.10028949	2.861924404	88.92424808	7.671080172	0.656747902	0.283668188	0.373079714	0.256819577	56.88463355
2	9	1	11	1	2	2	bell	1	7.14	134	3.68	1	0	112.8100834	100.4896372	12.3204462	188.9933548	98.86899689	-0.770547632	-0.89516148	0.124613848	81.8153558	79.81084513	2.004510675	88.92424808	7.671080172	-0.926713334	-1.188020819	0.261307485	0.379878958	57.26204371
2	9	1	11	0	3	2	green							102.2746898	94.72817297	7.546516821	188.9933548	98.86899689	-0.877106755	-0.9534352	0.076328445	80.11592133	78.78866161	1.327259721	88.92424808	7.671080172	-1.148251166	-1.321272395	0.173021229	0.179238663	57.49984536
2	9	1	11	1	4	2	egg	2	14.29	664	18.25	2	0	105.5133945	95.33589782	10.17749668	188.9933548	98.86899689	-0.844349219	-0.947288432	0.102939212	80.65548358	78.89955706	1.755926522	88.92424808	7.671080172	-1.077913972	-1.306816093	0.228902121	0.235417946	56.70410474
2	9	1	12	1	1	2	green	2	12.5	544	19.93	2	1	225.009651	193.2916329	31.71801814	188.9933548	98.86899689	0.364283014	0.043474478	0.320808536	93.77487611	91.13695052	2.637925598	88.92424808	7.671080172	0.632326598	0.28844731	0.343879288	0.259631838	57.20043909
2	9	1	12	0	2	2	bell							207.6253572	177.9497094	29.67564778	188.9933548	98.86899689	0.188451415	-0.111699782	0.300151197	92.37412194	89.70392214	2.670199794	88.92424808	7.671080172	0.449724652	0.101638106	0.348086546	0.337222962	58.02367676
2	9	1	12	1	3	2	silver	2	12.5	390	14.29	2	0	203.5809608	87.53982173	116.0411391	188.9933548	98.86899689	0.147544796	-1.026141018	1.173685814	92.03351637	78.21635272	13.81716365	88.92424808	7.671080172	0.405323399	-1.395878432	1.801201831	0.334238688	56.30058042
2	9	1	12	0	4	2	bell							239.0670806	229.3013589	9.765721706	188.9933548	98.86899689	0.506465397	0.407691039	0.098774358	94.8152601	94.09369554	0.721564569	88.92424808	7.671080172	0.767950782	0.673887816	0.094062967	0.280521756	50.91059736
2	9	2	13	1	5	0	brother	5	35.71	1674	56.17	3	0	265.7008683	181.9093436	83.79152469	188.9933548	98.86899689	0.775850023	-0.071650481	0.847500504	96.64391034	90.08487761	6.559032733	88.92424808	7.671080172	1.006333148	0.151299361	0.855033787	0.430862158	60.82027345
2	9	2	13	0	6	0	doctor							188.6923291	179.139074	9.553255058	188.9933548	98.86899689	-0.003044693	-0.09967008	0.096625387	90.71870357	89.81924079	0.899462775	88.92424808	7.671080172	0.233924747	0.116671015	0.117253732	0.499316894	50.81098914
2	9	2	13	0	5	0	brother							229.2346601	105.3464578	123.8882023	188.9933548	98.86899689	0.407016421	-0.846037683	1.253054104	94.18371124	80.62889506	13.55481619	88.92424808	7.671080172	0.685622239	-1.081380045	1.767002283	0.419702255	61.18093692
2	9	2	13	1	6	0	doctor	1	7.14	170	8.93	1	0	285.1387192	198.9946248	86.14409447	188.9933548	98.86899689	0.972452107	0.101156786	0.871295321	97.86624177	91.63905027	6.227191495	88.92424808	7.671080172	1.165675953	0.353900902	0.811775051	0.476814726	53.42359009
2	9	2	14	0	5	0	He							266.3156122	210.067096	56.24851628	188.9933548	98.86899689	0.782067785	0.213148124	0.568919661	96.68391835	92.57695047	4.106967884	88.92424808	7.671080172	1.011548582	0.476165326	0.535383256	0.133217282	53.92055564
2	9	2	14	1	6	0	study	3	10.34	598	17.66	3	1	210.6080486	100.6104194	109.9976292	188.9933548	98.86899689	0.218619531	-0.893939842	1.112559373	92.62105549	79.83163093	12.78942456	88.92424808	7.671080172	0.481914845	-1.185311188	1.667226032	0.487575251	55.56903876
2	9	2	14	1	5	0	He	3	16.67	734	22.97	3	0	268.0504381	239.1842248	28.86621325	188.9933548	98.86899689	0.799614498	0.50765024	0.291964258	96.79632819	94.82374338	1.972584813	88.92424808	7.671080172	1.026202299	0.769056661	0.257145639	0.14514063	53.80468491
2	9	2	14	0	6	0	study							260.4133089	229.4958172	30.91749173	188.9933548	98.86899689	0.722369563	0.409657867	0.312711696	96.29606841	94.10788859	2.188179822	88.92424808	7.671080172	0.960988565	0.675738018	0.285250548	0.513653603	52.82240159
2	9	2	15	0	5	0	three							104.2277009	97.62397709	6.603723795	188.9933548	98.86899689	-0.857353231	-0.924145896	0.066792665	80.44314865	79.31018102	1.132967631	88.92424808	7.671080172	-1.105593898	-1.253287261	0.147693363	0.235395215	56.49273569
2	9	2	15	1	6	0	shirts	0	0	0	0	0	0	262.4985481	104.9478136	157.5507346	188.9933548	98.86899689	0.743460494	-0.850069727	1.593530221	96.4339876	80.5623396	15.87164799	88.92424808	7.671080172	0.978967675	-1.090056197	2.069023872	0.466134016	52.75039879
2	9	2	15	1	5	0	three	3	17.65	596	25.96	3	0	243.1497345	210.3433932	32.80634124	188.9933548	98.86899689	0.547758968	0.215942702	0.331816265	95.10841447	92.59930867	2.509105798	88.92424808	7.671080172	0.806166309	0.479079935	0.327086374	0.239484946	58.20491842
2	9	2	15	0	6	0	shirts							--undefined--	--undefined--	#VALUE!	188.9933548	98.86899689	#VALUE!	#VALUE!	#VALUE!	--undefined--	--undefined--	#VALUE!	88.92424808	7.671080172	#VALUE!	#VALUE!	#VALUE!	0.447110659	51.42364752
2	9	3	16	1	7	1	must	2	1.71	440	1.96	1	0	98.4153517	92.46313463	5.952217063	188.9933548	98.86899689	-0.916141621	-0.976344691	0.060203069	79.44973767	78.36968091	1.080056758	88.92424808	7.671080172	-1.235094693	-1.375890609	0.140795916	0.311830506	55.5954319
2	9	3	16	1	8	1	may	1	0.85	334	1.48	1	0	197.1959126	82.16992554	115.0259871	188.9933548	98.86899689	0.082963902	-1.080454264	1.163418166	91.48197786	77.14643397	14.33554389	88.92424808	7.671080172	0.333424984	-1.535352759	1.868777743	0.240511633	59.00179233
2	9	3	17	1	9	1	allows	3	2.56	424	1.88	2	0	188.6879813	88.27097407	100.4170072	188.9933548	98.86899689	-0.003088668	-1.018745855	1.015657187	90.97203705	77.56640655	13.4056305	88.92424808	7.671080172	0.266949233	-1.480605244	1.747554477	0.457351409	58.75385678
2	9	3	17	1	10	1	requires	0	0	0	0	0	0	188.9772789	73.42489774	115.5523811	188.9933548	98.86899689	-0.000162598	-1.168904922	1.168742324	91.18517365	74.37836935	16.8068043	88.92424808	7.671080172	0.294733665	-1.896196938	2.190930602	0.597675136	55.30533317
2	9	3	18	1	11	0	personal	1	0.93	248	1.43	1	0	245.193203	179.5840987	65.60910432	188.9933548	98.86899689	0.568427413	-0.095168925	0.663596338	95.25330212	89.86099347	5.392308651	88.92424808	7.671080172	0.825053825	0.122113883	0.702939942	0.491496307	58.54041357
2	9	3	18	1	12	0	group	1	0.93	54	0.31	1	0	191.2992199	183.2947906	8.004429282	188.9933548	98.86899689	0.023322428	-0.057637524	0.080959953	90.95624685	90.21626369	0.739983168	88.92424808	7.671080172	0.264890827	0.168426816	0.096464011	0.266574268	53.78145649
2	9	3	19	1	13	0	group	1	0.93	130	0.75	1	0	98.83558567	86.36841903	12.46716664	188.9933548	98.86899689	-0.911891209	-1.037989046	0.126097837	79.52555218	77.18918372	2.336368462	88.92424808	7.671080172	-1.225211533	-1.529779913	0.30456838	0.316556944	56.74467243
2	9	3	19	1	14	0	personal	2	1.87	272	1.57	1	0	229.2299451	68.88905287	160.3408922	188.9933548	98.86899689	0.406968732	-1.214782245	1.621750976	94.08782053	73.4378268	20.64999372	88.92424808	7.671080172	0.673121951	-2.018805818	2.691927769	0.443516292	55.38411947
2	10	1	1	1	1	0	blue	6	30	1428	34.53	4	1	208.1996267	182.3075572	25.89206957	207.60777	74.40939282	0.007954059	-0.340013698	0.347967757	92.42189627	90.12276667	2.299129592	91.47500663	5.489787063	0.172482034	-0.246319201	0.418801235	0.245469058	59.12713925
2	10	1	1	0	2	0	drum							180.2869311	171.7025203	8.584410755	207.60777	74.40939282	-0.367169223	-0.482536523	0.115367301	89.92990757	89.08520972	0.844697854	91.47500663	5.489787063	-0.281449725	-0.435316868	0.153867143	0.290926291	54.62698046
2	10	1	1	1	3	0	yellow	2	10	320	7.74	2	0	179.8399238	155.3864552	24.45346853	207.60777	74.40939282	-0.373176627	-0.701810791	0.328634164	89.88717801	87.3566033	2.530574711	91.47500663	5.489787063	-0.289233189	-0.750193639	0.460960449	0.348505453	56.50082273
2	10	1	1	0	4	0	drum							--undefined--	--undefined--	#VALUE!	207.60777	74.40939282	#VALUE!	#VALUE!	#VALUE!	--undefined--	--undefined--	#VALUE!	91.47500663	5.489787063	#VALUE!	#VALUE!	#VALUE!	0.230316647	51.38323445
2	10	1	2	0	1	0	blue							207.183542	186.7850253	20.39851673	207.60777	74.40939282	-0.00570127	-0.279840272	0.274139002	92.33725346	90.5428061	1.794447362	91.47500663	5.489787063	0.157063802	-0.169806319	0.326870121	0.192506357	62.16336624
2	10	1	2	1	2	0	drum	2	14.29	430	15.24	2	1	184.7119315	79.36974801	105.3421835	207.60777	74.40939282	-0.307700918	-1.723411751	1.415710833	90.34970779	76.53452008	13.81518771	91.47500663	5.489787063	-0.204980417	-2.721505658	2.516525241	0.335862155	56.86100841
2	10	1	2	0	3	0	blue							194.0532427	170.6643822	23.38886045	207.60777	74.40939282	-0.182161509	-0.496488231	0.314326722	91.20370477	88.97942544	2.224279328	91.47500663	5.489787063	-0.049419378	-0.454586155	0.405166777	0.151547558	58.55296783
2	10	1	2	1	4	0	ball	1	7.14	186	6.59	1	0	171.6370474	169.2627788	2.374268563	207.60777	74.40939282	-0.483416424	-0.515324608	0.031908184	89.07860614	88.8361553	0.24245084	91.47500663	5.489787063	-0.436519753	-0.480683732	0.044163979	0.264184256	55.44489682
2	10	1	3	0	1	0	gold							225.4453045	189.1211184	36.32418612	207.60777	74.40939282	0.239721543	-0.248445135	0.488166678	93.79960383	90.75801169	3.041592136	91.47500663	5.489787063	0.423440321	-0.130605237	0.554045559	0.224124089	62.26048701
2	10	1	3	1	2	0	sock	2	9.52	294	7.79	2	0	200.8809371	200.3653287	0.51560841	207.60777	74.40939282	-0.090403008	-0.097332353	0.006929346	91.80219193	91.75786891	0.04432302	91.47500663	5.489787063	0.059598905	0.051525182	0.008073723	0.303429536	58.2459486
2	10	1	3	0	3	0	gold							182.2019901	177.1824967	5.019493352	207.60777	74.40939282	-0.341432431	-0.408890224	0.067457793	90.11348206	89.62910738	0.484374675	91.47500663	5.489787063	-0.248010452	-0.336242413	0.088231961	0.141370579	60.53264006
2	10	1	3	1	4	0	star	1	4.76	176	4.66	1	0	--undefined--	--undefined--	#VALUE!	207.60777	74.40939282	#VALUE!	#VALUE!	#VALUE!	--undefined--	--undefined--	#VALUE!	91.47500663	5.489787063	#VALUE!	#VALUE!	#VALUE!	0.344806291	55.7673143
2	10	1	4	1	1	0	gold	3	15	694	15.37	2	1	198.3057948	186.2266639	12.07913092	207.60777	74.40939282	-0.125010766	-0.287344182	0.162333416	91.57933102	90.49106773	1.088263284	91.47500663	5.489787063	0.019003358	-0.179230795	0.198234153	0.190746343	62.25874792
2	10	1	4	0	2	0	sock							185.5671979	184.45437	1.112827904	207.60777	74.40939282	-0.296206853	-0.31116233	0.014955476	90.42915077	90.32544191	0.103708863	91.47500663	5.489787063	-0.190509368	-0.209400603	0.018891235	0.319389225	56.43624013
2	10	1	4	1	3	0	red	1	5	622	13.78	1	0	181.9961669	171.7937403	10.20242661	207.60777	74.40939282	-0.344198523	-0.481310603	0.13711208	90.0932294	89.0940571	0.999172304	91.47500663	5.489787063	-0.251699604	-0.433705261	0.182005657	0.115334998	56.45362356
2	10	1	4	0	4	0	sock							--undefined--	--undefined--	#VALUE!	207.60777	74.40939282	#VALUE!	#VALUE!	#VALUE!	--undefined--	--undefined--	#VALUE!	91.47500663	5.489787063	#VALUE!	#VALUE!	#VALUE!	0.381492686	53.94608663
2	10	1	5	0	1	1	yellow							207.4144097	180.696426	26.71798372	207.60777	74.40939282	-0.002598601	-0.361665954	0.359067353	92.35647341	89.97039901	2.386074396	91.47500663	5.489787063	0.160564839	-0.274073949	0.434638789	0.326091794	64.07213566
2	10	1	5	1	2	1	tree	0	0	0	0	0	0	180.3519417	170.504286	9.847655795	207.60777	74.40939282	-0.366295534	-0.49863979	0.132344256	89.93605859	88.96411111	0.971947482	91.47500663	5.489787063	-0.280329278	-0.457375758	0.177046481	0.361030201	55.6399788
2	10	1	5	0	3	1	yellow							173.7653533	75.82315183	97.94220145	207.60777	74.40939282	-0.454813773	-1.771075037	1.316261264	89.29203314	75.73845056	13.55358258	91.47500663	5.489787063	-0.397642653	-2.866514838	2.468872185	0.271743162	58.76345777
2	10	1	5	1	4	1	star	1	4.55	244	6.41	1	0	168.972175	166.7468691	2.225305902	207.60777	74.40939282	-0.51923008	-0.54913633	0.02990625	88.80679013	88.57819035	0.228599783	91.47500663	5.489787063	-0.486032786	-0.527673705	0.041640919	0.679357905	52.57516154
2	10	1	6	1	1	1	yellow	1	7.14	160	6.95	1	0	210.751781	186.6461173	24.10566369	207.60777	74.40939282	0.042252878	-0.281707079	0.323959957	92.63283685	90.53009717	2.102739679	91.47500663	5.489787063	0.210906216	-0.172121332	0.383027548	0.309871812	63.59587305
2	10	1	6	0	2	1	tree							186.0638375	175.8855639	10.17827363	207.60777	74.40939282	-0.289532433	-0.426319916	0.136787484	90.47584652	89.50193495	0.973911573	91.47500663	5.489787063	-0.182003437	-0.359407689	0.177404252	0.341927517	55.79095551
2	10	1	6	1	3	1	white	2	14.29	288	12.51	1	0	183.7730982	170.2091025	13.56399571	207.60777	74.40939282	-0.320318053	-0.502606809	0.182288757	90.26139663	88.9334013	1.32799533	91.47500663	5.489787063	-0.221066862	-0.462969748	0.241902885	0.181648993	54.42947691
2	10	1	6	0	4	1	tree							239.7202242	223.5260719	16.1941523	207.60777	74.40939282	0.431564524	0.213928663	0.217635861	94.86249382	93.65233715	1.210156664	91.47500663	5.489787063	0.617052565	0.396614749	0.220437816	0.338365772	51.58150907
2	10	1	7	0	1	1	brown							224.3163739	178.6651196	45.65125426	207.60777	74.40939282	0.22454966	-0.388965013	0.613514673	93.71762501	89.77337037	3.944254638	91.47500663	5.489787063	0.408507352	-0.309963983	0.718471335	0.315853811	59.37915546
2	10	1	7	1	2	1	angel	4	12.12	828	12.75	4	1	184.2942967	81.23569238	103.0586044	207.60777	74.40939282	-0.313313581	-1.69833502	1.385021439	90.31042399	76.91776085	13.39266314	91.47500663	5.489787063	-0.212136214	-2.651695888	2.439559674	0.494027756	57.04063471
2	10	1	7	0	3	1	brown							177.9785348	84.24795307	93.73058176	207.60777	74.40939282	-0.398192138	-1.657852756	1.259660618	89.70690037	76.75883675	12.94806362	91.47500663	5.489787063	-0.32207192	-2.680644934	2.358573014	0.257581161	54.97267179
2	10	1	7	1	4	1	egg	1	3.03	174	2.68	1	0	170.6297125	160.3314102	10.29830227	207.60777	74.40939282	-0.496954163	-0.635354732	0.138400569	88.97643196	87.89895934	1.077472618	91.47500663	5.489787063	-0.455131436	-0.6514	0.196268563	0.141729274	53.95405916
2	10	1	8	1	1	1	brown	4	22.22	444	12.79	3	0	211.6215303	180.9543846	30.66714571	207.60777	74.40939282	0.053941581	-0.358199206	0.412140787	92.70415659	89.9937993	2.710357291	91.47500663	5.489787063	0.223897566	-0.269811436	0.493709002	0.272877329	61.17012721
2	10	1	8	0	2	1	angel							195.9776872	89.63756881	106.3401184	207.60777	74.40939282	-0.156298585	-1.585420828	1.429122243	91.37441365	77.83263437	13.54177928	91.47500663	5.489787063	-0.018323658	-2.485045796	2.466722138	0.491686501	54.63537897
2	10	1	8	1	3	1	green	4	22.22	826	23.79	3	0	187.490512	175.9704912	11.52002074	207.60777	74.40939282	-0.270359121	-0.425178564	0.154819444	90.60809141	89.51027653	1.09781488	91.47500663	5.489787063	-0.15791418	-0.357888217	0.199974037	0.206607121	57.29668229
2	10	1	8	0	4	1	angel							92.62542183	91.31122988	1.31419195	207.60777	74.40939282	-1.545266583	-1.562928223	0.017661641	78.40022355	78.15264474	0.247578808	91.47500663	5.489787063	-2.381655779	-2.42675385	0.045098072	0.401519499	53.23061177
2	10	1	9	0	1	2	blue							208.4058506	185.0226472	23.38320346	207.60777	74.40939282	0.010725536	-0.303525159	0.314250695	92.43902363	90.37748095	2.061542678	91.47500663	5.489787063	0.175601893	-0.199921357	0.37552325	0.239003413	62.6136982
2	10	1	9	1	2	2	egg	1	6.67	194	6.49	1	0	179.7085263	169.1743228	10.53420347	207.60777	74.40939282	-0.374942499	-0.516513383	0.141570884	89.87324883	88.82840487	1.044843964	91.47500663	5.489787063	-0.291770479	-0.482095522	0.190325043	0.181023505	56.71982188
2	10	1	9	0	3	2	blue							178.0665438	171.9934338	6.073109972	207.60777	74.40939282	-0.397009371	-0.478626889	0.081617519	89.71527536	89.11454638	0.600728987	91.47500663	5.489787063	-0.320546362	-0.429973007	0.109426645	0.123740936	56.39501073
2	10	1	9	1	4	2	sock	3	20	662	22.16	3	0	172.5534617	172.2890728	0.26438892	207.60777	74.40939282	-0.471100583	-0.474653748	0.003553166	89.17079211	89.14424872	0.026543388	91.47500663	5.489787063	-0.419727486	-0.424562535	0.004835049	0.284041694	53.17315417
2	10	1	10	1	1	2	blue	1	8.33	336	12.03	1	0	201.5186128	187.0260377	14.49257507	207.60777	74.40939282	-0.08183318	-0.276601267	0.194768087	91.85724957	90.5651439	1.292105664	91.47500663	5.489787063	0.069628008	-0.165737345	0.235365353	0.189024612	62.68081751
2	10	1	10	0	2	2	egg							190.446157	156.6573742	33.78878283	207.60777	74.40939282	-0.230637724	-0.684730702	0.454092978	90.87879252	87.49776297	3.381029556	91.47500663	5.489787063	-0.108604233	-0.724480497	0.615876265	0.249032425	57.52971002
2	10	1	10	1	3	2	brown	3	25	886	31.71	2	0	177.2892119	168.487323	8.801888932	207.60777	74.40939282	-0.407456061	-0.525746086	0.118290024	89.63953139	88.75763561	0.881895778	91.47500663	5.489787063	-0.334343613	-0.494986598	0.160642985	0.195025393	55.85092113
2	10	1	10	0	4	2	egg							166.1371089	162.8547301	3.28237879	207.60777	74.40939282	-0.557330997	-0.601443423	0.044112426	88.51408212	88.16930176	0.344780364	91.47500663	5.489787063	-0.539351432	-0.60215539	0.062803959	0.192025002	51.3520964
2	10	1	11	0	1	2	green							207.1754191	181.234077	25.94134212	207.60777	74.40939282	-0.005810435	-0.354440374	0.348629939	92.33651861	90.02052524	2.315993365	91.47500663	5.489787063	0.156929944	-0.264943134	0.421873079	0.246570762	61.4126657
2	10	1	11	1	2	2	bell	1	8.33	346	10.61	1	0	181.0759232	176.0691662	5.00675705	207.60777	74.40939282	-0.356565829	-0.423852455	0.067286626	90.00576144	89.51999207	0.48576937	91.47500663	5.489787063	-0.267632455	-0.356118469	0.088486013	0.324847195	56.59325712
2	10	1	11	0	3	2	green							179.4396268	86.63987409	92.79975274	207.60777	74.40939282	-0.378556284	-1.625707338	1.247151054	89.84837621	77.24301898	12.60535723	91.47500663	5.489787063	-0.296301187	-2.592448029	2.296146842	0.160466687	55.62433223
2	10	1	11	1	4	2	egg	1	8.33	304	9.33	1	0	168.7434031	83.20528971	85.53811336	207.60777	74.40939282	-0.522304583	-1.671865279	1.149560696	88.7842475	76.54324013	12.24100737	91.47500663	5.489787063	-0.490139071	-2.719917245	2.229778174	0.250484584	52.48394587
2	10	1	12	1	1	2	green	4	23.53	672	17.4	4	2	207.26659	188.3264066	18.94018338	207.60777	74.40939282	-0.004585174	-0.259125396	0.254540222	92.34417512	90.68475026	1.659424856	91.47500663	5.489787063	0.158324627	-0.143950278	0.302274904	0.236601659	62.85724716
2	10	1	12	0	2	2	bell							196.1474404	178.2561581	17.89128232	207.60777	74.40939282	-0.154017244	-0.394461113	0.240443869	91.38894618	89.73369966	1.655246516	91.47500663	5.489787063	-0.015676464	-0.317190257	0.301513793	0.277749773	58.90771459
2	10	1	12	1	3	2	silver	3	17.65	658	17.04	3	2	196.2211972	142.9378093	53.28338782	207.60777	74.40939282	-0.153026014	-0.869110179	0.716084165	91.39604508	85.91229157	5.483753503	91.47500663	5.489787063	-0.014383354	-1.013284304	0.99890095	0.22974364	61.56601048
2	10	1	12	0	4	2	bell							150.1079259	142.3920294	7.715896463	207.60777	74.40939282	-0.772749809	-0.876445004	0.103695195	86.75827614	85.84458247	0.913693667	91.47500663	5.489787063	-0.859182777	-1.025617951	0.166435175	0.277749773	53.46137837
2	10	2	13	1	5	0	brother	5	38.46	1294	47.09	5	0	244.7817845	204.3267823	40.45500216	207.60777	74.40939282	0.499587661	-0.04409373	0.543681391	95.22422872	92.09831425	3.125914471	91.47500663	5.489787063	0.682944902	0.113539489	0.569405413	0.361966081	62.60685378
2	10	2	13	0	6	0	doctor							171.4235	159.9235205	11.49997953	207.60777	74.40939282	-0.486286323	-0.640836428	0.154550105	89.05705306	87.85485991	1.202193145	91.47500663	5.489787063	-0.440445785	-0.659432994	0.21898721	0.444114412	52.99640698
2	10	2	13	0	5	0	brother							204.0451032	189.8206433	14.22445987	207.60777	74.40939282	-0.047879262	-0.239044105	0.191164843	92.0729329	90.8219321	1.251000798	91.47500663	5.489787063	0.108916113	-0.118961724	0.227877837	0.315211557	63.06012087
2	10	2	13	1	6	0	doctor	4	28.57	844	33.87	2	0	211.4988166	207.5691822	3.929634473	207.60777	74.40939282	0.052292412	-0.000518588	0.052810999	92.69406937	92.36953737	0.324532007	91.47500663	5.489787063	0.222060114	0.162944524	0.05911559	0.414477075	52.8617755
2	10	2	14	0	5	0	He							215.5834376	204.8389844	10.74445313	207.60777	74.40939282	0.107186301	-0.037210163	0.144396464	93.02545341	92.14015771	0.885295706	91.47500663	5.489787063	0.282423846	0.121161544	0.161262302	0.078659479	64.84279533
2	10	2	14	1	6	0	study	1	6.25	112	3.24	1	0	190.0575217	175.0642201	14.99330164	207.60777	74.40939282	-0.235860657	-0.43735809	0.201497432	90.84350775	89.42088532	1.422622428	91.47500663	5.489787063	-0.11503158	-0.3741714	0.25913982	0.353967655	57.45568156
2	10	2	14	1	5	0	He	0	0	0	0	0	0	246.0520023	197.3815206	48.67048175	207.60777	74.40939282	0.516658325	-0.137432238	0.654090564	95.31383336	91.49811935	3.815714013	91.47500663	5.489787063	0.699266963	0.00421013	0.695056833	0.094260194	61.76599892
2	10	2	14	0	6	0	study							85.70714925	71.96690366	13.74024559	207.60777	74.40939282	-1.63824238	-1.822899787	0.184657408	77.05758378	74.0311402	3.026443578	91.47500663	5.489787063	-2.626226243	-3.177512394	0.551286151	0.323579771	56.01593618
2	10	2	15	0	5	0	three							254.7803853	184.1544323	70.62595298	207.60777	74.40939282	0.633960492	-0.315193241	0.949153733	95.91732484	90.29726773	5.620057108	91.47500663	5.489787063	0.809196815	-0.214532711	1.023729526	0.182525577	59.8655992
2	10	2	15	1	6	0	shirts	5	25	968	24.52	4	1	87.33260774	75.05794578	12.27466196	207.60777	74.40939282	-1.616397577	-1.781358767	0.16496119	77.40194987	74.75919481	2.642755056	91.47500663	5.489787063	-2.563497746	-3.044892567	0.481394821	0.457136129	53.13505325
2	10	2	15	1	5	0	three	5	26.32	956	24.91	4	0	210.7556397	195.6183696	15.13727013	207.60777	74.40939282	0.042304736	-0.161127513	0.203432249	92.63312913	91.34282453	1.290304599	91.47500663	5.489787063	0.210959457	-0.024077819	0.235037277	0.295982756	60.50865997
2	10	2	15	0	6	0	shirts							204.6849815	183.6283855	21.05659598	207.60777	74.40939282	-0.039279833	-0.32226287	0.282983038	92.12713728	90.24774335	1.879393928	91.47500663	5.489787063	0.118789789	-0.223553895	0.342343684	0.554554527	54.99777816
2	10	3	16	1	7	1	must	2	1.55	470	1.69	2	1	221.4683434	179.700001	41.76834242	207.60777	74.40939282	0.186274513	-0.375057072	0.561331585	93.49151177	89.87336955	3.618142222	91.47500663	5.489787063	0.367319372	-0.291748489	0.659067862	0.366259785	60.24473111
2	10	3	16	1	8	1	may	3	2.33	558	2	2	0	193.1943104	179.8070255	13.38728496	207.60777	74.40939282	-0.193704841	-0.373618752	0.179913911	91.12692832	89.88380899	1.243119328	91.47500663	5.489787063	-0.063404702	-0.289846878	0.226442176	0.192019693	56.85481837
2	10	3	17	1	9	1	allows	2	1.55	424	1.52	1	0	202.6675178	180.7862817	21.88123609	207.60777	74.40939282	-0.066392857	-0.360458368	0.294065511	91.9557444	89.97770093	1.978043472	91.47500663	5.489787063	0.087569475	-0.272743858	0.360313332	0.259582178	59.43995053
2	10	3	17	1	10	1	requires	3	2.33	424	1.52	2	0	240.7385332	180.8790185	59.8595147	207.60777	74.40939282	0.445249745	-0.359212063	0.804461808	94.93587925	89.9865751	4.949304155	91.47500663	5.489787063	0.630420193	-0.271127371	0.901547563	0.416042669	57.29995444
2	10	3	18	1	11	0	personal	4	3.15	616	2.22	1	0	291.7524904	112.6868709	179.0656195	207.60777	74.40939282	1.130834659	-1.275657488	2.406492147	98.26321392	82.56143719	15.70177673	91.47500663	5.489787063	1.23651559	-1.623663967	2.860179557	0.338250977	58.27864997
2	10	3	18	1	12	0	group	2	1.57	694	2.5	2	0	197.344441	191.2048512	6.139589772	207.60777	74.40939282	-0.137930557	-0.220441509	0.082510951	91.49489365	90.9479268	0.546966853	91.47500663	5.489787063	0.003622548	-0.096010979	0.099633527	0.198440573	57.14824055
2	10	3	19	1	13	0	group	1	0.79	500	1.8	1	0	206.5912893	194.8139482	11.77734117	207.60777	74.40939282	-0.013660651	-0.171938264	0.158277613	92.28762739	91.27143797	1.016189421	91.47500663	5.489787063	0.148024094	-0.03708134	0.185105435	0.270600782	54.86683607
2	10	3	19	1	14	0	personal	1	0.79	300	1.08	1	0	238.7471811	96.80928086	141.9379002	207.60777	74.40939282	0.418487639	-1.489039017	1.907526656	94.79207867	79.16488348	15.62719518	91.47500663	5.489787063	0.604225993	-2.242368057	2.84659405	0.396881147	55.38766777
